# Supplementary material for: Enantioselective Total Synthesis and Structural Revision of Dysiherbol A
Source: PubMed Central journal article supplement — Angew Chem Int Ed Engl. 2021 Jun 1;60(27):14915–20. doi: 10.1002/anie.202105733 (PMC8251742; doi:10.1002/anie.202105733), 2021-06-01
Supplement: ANIE-60-14915-s001.pdf [file ANIE-60-14915-s001.pdf]

Supporting Information

**Enantioselective Total Synthesis and Structural Revision of  
Dysiherbol A**

*Julian Baars, Isabelle Grimm, Dirk Blunk, Jörg-Martin Neudörfl, and Hans-Günther Schmalz\**

anie\_202105733\_sm\_miscellaneous\_information.pdf

**Table of Contents**

|                                                                                                                  |    |
|------------------------------------------------------------------------------------------------------------------|----|
| 1. Overview of the Reaction Sequences.....                                                                       | 3  |
| 2. General Experimental Information.....                                                                         | 5  |
| 3. Synthetic Procedures and Compound Data .....                                                                  | 7  |
| 4. Comparison of NMR Data of Natural (+)-dysiherbol A ( <i>ent</i> -31) and Synthetic (–)-dysiherbol A (31)..... | 33 |
| 5. Further Analytical Spectra of (–)-dysiherbol A (31).....                                                      | 37 |
| 6. NMR Spectra .....                                                                                             | 40 |
| 7. X-ray Crystallographic Data .....                                                                             | 69 |
| 8. Chiral HPLC Analysis of (2 <i>S</i> ,3 <i>R</i> )-2-(2,5-Dimethoxybenzyl)-2,3-dimethylcyclohexanone (11)..... | 82 |
| 9. References .....                                                                                              | 84 |

## 1. Overview of the Reaction Sequences

## 1.1. Total Synthesis of (-)-dysiherbol A (31)

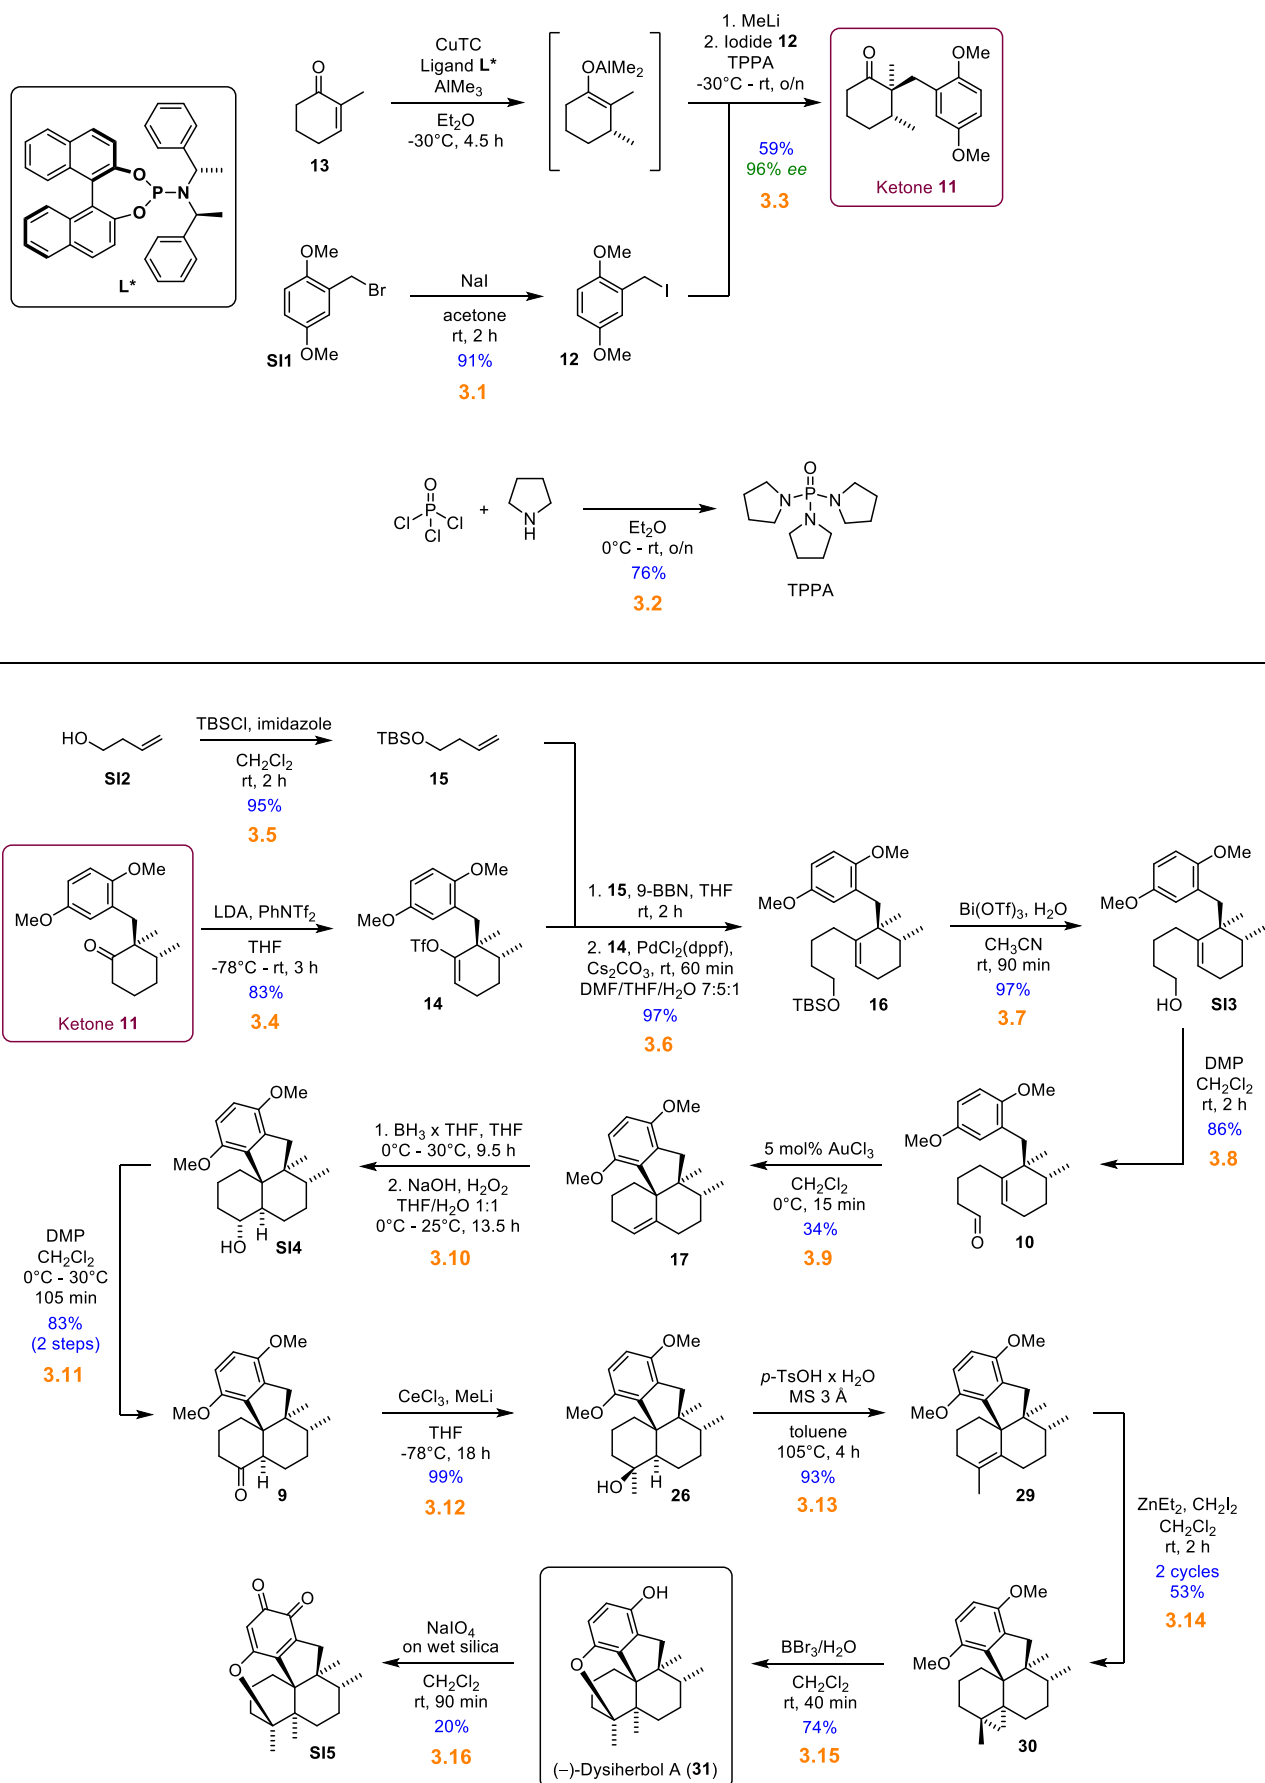

## 1.2. Synthesis of nor-(–)-dysiherbol A Derivatives

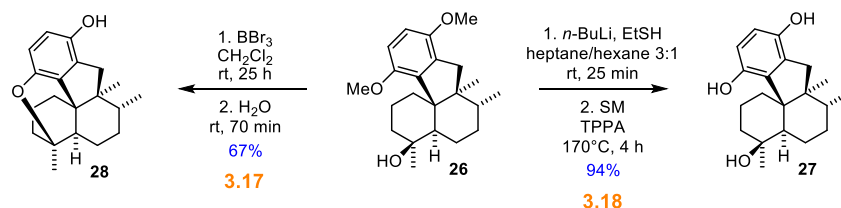

## 1.3. Stepwise Transformation of Cyclopropane 30 into (–)-dysiherbol A (31)

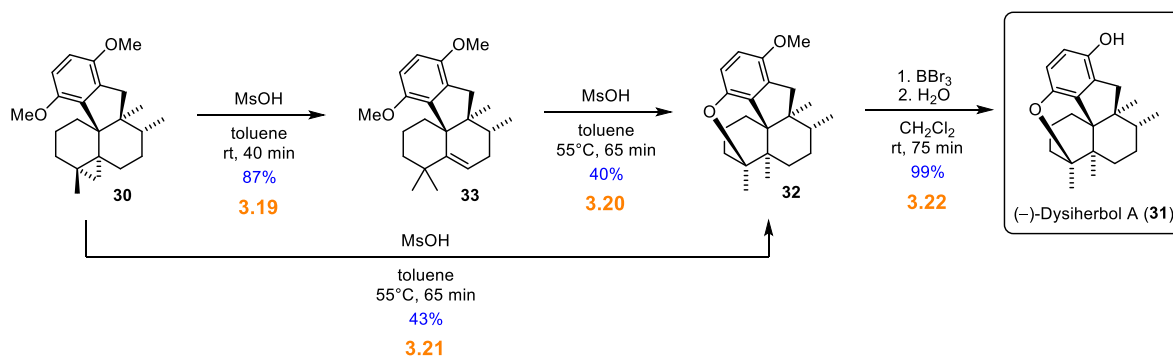

## 1.4. Further Approaches towards the Synthesis of (–)-dysiherbol A (31)

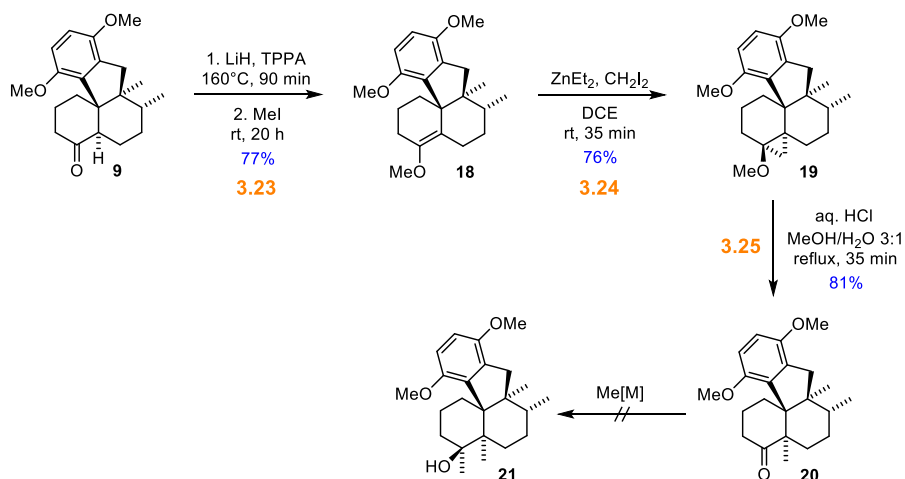1.5.  $\text{AuCl}_3$ -Catalyzed Cyclization of Allylic Alcohol 25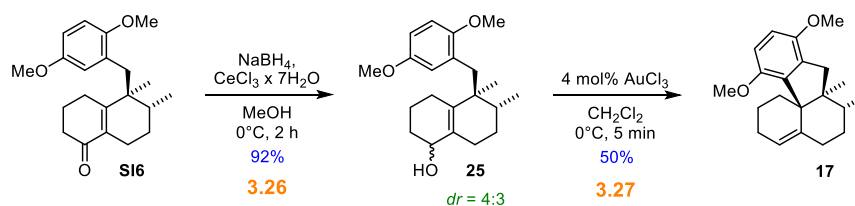

## 2. General Experimental Information

### 2.1. Reagents and Solvents

All reagents and reactants were purchased from *Acros Organics*, *Sigma-Aldrich*, *Merck*, *Alfa Aesar*, *Carbolution*, *ABCR*, *TCI Chemicals* or *Fluka* with a purity of  $\geq 95\%$  and used without further purification unless otherwise noted. The solvents were distilled before use. Dry THF, Et<sub>2</sub>O and toluene were obtained by distillation from sodium/benzophenone, dry CH<sub>2</sub>Cl<sub>2</sub> by distillation from CaH<sub>2</sub> under argon atmosphere. 2-Methylcyclohex-2-enone,<sup>[1]</sup> 2-bromomethyl-2,5-dimethoxybenzene<sup>[2]</sup> and the phosphoramidite ligand L\*<sup>[3]</sup> were synthesized on multi gram scale based on literature known procedures.

### 2.2. Working Techniques

Air sensitive reactions were performed in flame-dried glassware under argon using a *Schlenk* line. Substances were added through argon-flushed syringes via septa or by addition under an argon stream. Solvent evaporation was conducted using a *Büchi* Rotavapor RE 114 rotary evaporator at 40°C water bath temperature unless otherwise noted. Room temperature (r.t.) corresponds to 24±3 °C.

### 2.3. Chromatography

Reactions were monitored by thin layer chromatography (TLC) on plates from *Merck* (silica gel 60 F<sub>254</sub> on aluminum foil, layer thickness 0.25 mm). Compounds were visualized under UV light ( $\lambda = 254$  nm), with KMnO<sub>4</sub> or with ceric ammonium molybdate as staining agent. Flash column chromatography was carried out with silica gel (particle size: 35 – 70  $\mu\text{m}$ , pore size: 60 Å) or ultrapure silica gel (particle size: 40 – 60  $\mu\text{m}$ , pore size: 60 Å) purchased from *Acros Organics*.

### 2.4. Nuclear Magnetic Resonance (NMR) Spectroscopy

<sup>1</sup>H, <sup>13</sup>C (standard or DEPTQ), <sup>31</sup>P and <sup>19</sup>F NMR spectra were measured in CDCl<sub>3</sub> at r.t. on a *Bruker Avance 300* (300 MHz), *Bruker Avance II 300* (300 MHz), *Bruker Avance II 500* (500 MHz), *Bruker Avance III 500* (500 MHz) or *Bruker Avance II+ 600* (600 MHz) spectrometer. Chemical shifts  $\delta$  are given in parts per million (ppm) relative to tetramethylsilane (TMS; <sup>1</sup>H and <sup>13</sup>C), 85% phosphoric acid (<sup>31</sup>P) or CFC<sub>3</sub> (<sup>19</sup>F) using the residual solvent (<sup>1</sup>H NMR: 7.26 ppm, <sup>13</sup>C NMR: 77.16 ppm) or TMS (0.00 ppm) as a reference. The information in parentheses report fine structures (s = singlet, d = doublet, t = triplet, q = quartet, quint = quintet, m = multiplet, br = broad), scalar coupling constants (*J*, given in Hz), relative integration of signals and the signal assignment. The non-trivial assignments were determined with the help of 2D NMR experiments: <sup>1</sup>H,<sup>1</sup>H-COSY, <sup>1</sup>H,<sup>1</sup>H-NOESY, <sup>1</sup>H,<sup>13</sup>C-HSQCed and <sup>1</sup>H,<sup>13</sup>C-HMBC. Assignments of NMR signals refer to the given numbering and do not necessarily correspond to IUPAC nomenclature.

### 2.5. Fourier-Transform Infrared (FT-IR) Spectroscopy

IR spectra were obtained using a *PerkinElmer* Spectrum Two FT-IR instrument in the ATR mode at room temperature. Absorption bands are given in cm<sup>-1</sup> (abbreviations: s = strong, m = medium, w = weak, br = broad).

### 2.6. Gas-Chromatography – Mass Spectroscopy (GC-MS)

GC-MS analysis was performed on a gas chromatograph *Agilent* HP6890 coupled with a mass detector (MSD) 5937 N. Capillary column: Optima-1-MS (*Macherey-Nagel*), 30 m x 0.25 mm  $\varnothing$ . Carrier gas: H<sub>2</sub>, 30 mL/min, 1.2 bar. Temperature program: 50°C (2 min), 50°C – 300°C (10 min), 300°C (5 min).

### 2.7. High Resolution Electrospray Ionization – Mass Spectroscopy (HRMS)

High resolution mass spectra were recorded on a *Thermo Scientific* LTQ Orbitrap XL instrument. ESI conditions were set as 3.4 kV (spray voltage), 3.0 V (capillary voltage), 3.0 V (tube lens voltage) and 275°C (capillary temperature). For a stable electrospray, sheath gas and sweep gas were used (Nitrogen 5.0,  $\geq 99.999\%$ , *Linde*).

### 2.8. Specific Optical Rotation ( $[\alpha]_D^{25}$ )

Optical rotation values were determined using an *Anton Paar* MCP 200 polarimeter with a cell length of 10 cm. All compounds were measured in CHCl<sub>3</sub> or MeOH with given concentrations at room temperature.

### 2.9. Melting Point (M.p.)

Melting points were determined on a *Büchi* B-545 instrument in open capillary tubes.

**2.10. X-Ray Crystallography**

X-ray data were obtained using a *Bruker* D8 VENTURE (Kappa geometry, microfocus source (Cu anode),  $\lambda = 1.54178 \text{ \AA}$ ) apparatus with a PHOTON III M14 or PHOTON 100 detector. Structure solution and refinement were performed using SHELXT<sup>[4]</sup> software.

**2.11. Chiral High Performance Liquid Chromatography (Chiral HPLC)**

The enantiomeric excess (*ee*) was determined on a *VWR Hitachi* Chromaster HPLC system with a CHIRALPAK AD-H column (column temperature: 18°C, detection at 250 nm) using a racemic standard.

**2.12. UV Spectroscopy**

The UV spectrum of (–)-dysiherbol A was measured on a *PerkinElmer* Lambda 35 UV/VIS spectrometer in methanol ( $10^{-5}$  M solution).

**2.13. ECD Spectroscopy**

The ECD spectrum of (–)-dysiherbol A was measured on a *Jasco* j-715 CD spectropolarimeter in methanol ( $10^{-3}$  M solution).

### 3. Synthetic Procedures and Compound Data

#### 3.1. 2-(Iodomethyl)-1,4-dimethoxybenzene (**12**)<sup>[5]</sup>

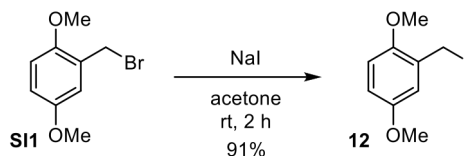

Note: Due to the light sensitivity of the product, all operations were performed under exclusion of sunlight in flasks wrapped with aluminum foil. To a solution of 45.8 g (198 mmol, 1.00 eq.) of 2-(bromomethyl)-1,4-dimethoxybenzene (**SI1**) in 280 mL of acetone were added 59.3 g (396 mmol, 2.00 eq.) of NaI and the suspension was stirred for 2 h at rt. Then, the precipitate was removed by filtration and the solution was concentrated under reduced pressure. The resulting pale yellow solid was immediately partitioned between 200 mL of sat. aqueous  $\text{Na}_2\text{S}_2\text{O}_3$  and 400 mL of  $\text{CH}_2\text{Cl}_2$  and the phases were separated. The organic layer was concentrated under reduced pressure to give 50.3 g (180 mmol, 91%) of **12** as a pale yellow solid. Alternative workup: Occasionally, the product crystallized during the first solvent removal. In this case, the flask was removed from the rotation evaporator and the crystallization process allowed to finished, before the crystals were washed with sat. aqueous  $\text{Na}_2\text{S}_2\text{O}_3$ , water and MeOH. The obtained colorless needles were finally dried *in vacuo*.

$\text{C}_9\text{H}_{11}\text{IO}_2$  ( $M = 278.09$  g/mol)

$R_f$  (*c*-Hex/EtOAc 9:1) = 0.53

**M.p.:** 59.5°C – 60.5°C

**$^1\text{H NMR}$**  (500 MHz,  $\text{CDCl}_3$ , 298 K):  $\delta$  [ppm] = 6.87 (d,  $J = 2.9$  Hz, 1H, 3-H), 6.80 (dd,  $J = 8.9, 2.9$  Hz, 1H, 5-H), 6.76 (d,  $J = 8.9$  Hz, 1H, 6-H), 4.46 (s, 2H, 7-H), 3.87 (s, 3H, 8-H), 3.76 (s, 3H, 9-H).

**$^{13}\text{C NMR}$**  (75 MHz,  $\text{CDCl}_3$ , 298 K):  $\delta$  [ppm] = 153.5 (C-4), 151.5 (C-1), 128.5 (C-2), 115.8 (C-3), 114.6 (C-5), 112.3 (C-6), 56.1 (C-8), 55.9 (C-9), 1.3 (C-7).

**FT-IR (ATR):**  $\tilde{\nu}$  [ $\text{cm}^{-1}$ ] = 3003 (w), 2988 (w), 2959 (w), 2934 (w), 2902 (w), 2832 (w), 1824 (w), 1605 (w), 1586 (w), 1491 (s), 1467 (m), 1439 (w), 1414 (m), 1318 (w), 1278 (m), 1263 (w), 1225 (s), 1185 (m), 1180 (m), 1148 (m), 1134 (m), 1084 (m), 1043 (s), 1019 (s), 927 (w), 875 (m), 825 (w), 801 (s), 757 (w), 730 (w), 714 (m), 576 (w), 550 (w).

**GC-MS** (70 eV):  $m/z$  (%) = 278 (4,  $[\text{M}]^+$ ), 151 (100), 137 (99), 121 (38), 91 (18), 77 (22), 66 (16), 39 (9).

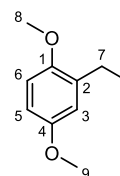

#### 3.2. Tris-(pyrrolidiny)-phosphoramidate (TPPA)<sup>[6]</sup>

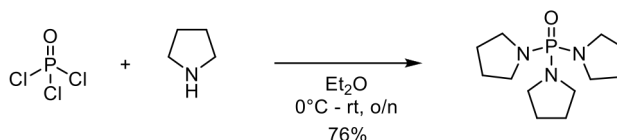

A 1000 mL three-necked round flask equipped with a 300 mL dropping funnel and a reflux condenser connected to a bubble counter (containing 1 M aqueous NaOH), was charged with 48.0 mL (79.0 g, 515 mmol, 1.00 eq.) of  $\text{POCl}_3$  dissolved in 250 mL of dry  $\text{Et}_2\text{O}$ . The magnetically stirred solution was cooled in an ice bath while 250 mL (213 g, 2.99 mol, 5.81 eq.) of pyrrolidine were added slowly over a period of 2 h through the dropping funnel. ((Note: Upon addition a white precipitate (pyrrolidine hydrochloride) forms immediately. As the reaction is exothermic, the dropping speed has to be controlled carefully). After complete addition, the stirred suspension was allowed to warm up to rt overnight. The white precipitate was separated off by filtration, washed with dry  $\text{Et}_2\text{O}$  and the combined organic solutions were concentrated under reduced pressure. To the resulting yellow oil were added several grams of

CaH<sub>2</sub> and the product was purified by fractional vacuum distillation (0.018 mbar, head temperature: 140°C) to provide 101 g (392 mmol, 76%) of TPPA as a colorless, viscous oil.

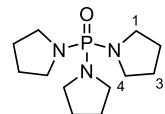

**C<sub>12</sub>H<sub>24</sub>N<sub>3</sub>OP** (**M** = 257.32 g/mol)

**<sup>1</sup>H NMR** (300 MHz, CDCl<sub>3</sub>, 298 K): δ [ppm] = 3.21 (td, *J* = 6.6, 4.2 Hz, 12H, 1-H, 4-H), 1.68 – 1.54 (m, 12H, 2-H, 3-H).

**<sup>13</sup>C NMR** (75 MHz, CDCl<sub>3</sub>, 298 K): δ [ppm] = 46.3 (d, *J*<sub>C,P</sub> = 4.4 Hz, C-1, C-4), 26.5 (d, *J*<sub>C,P</sub> = 8.0 Hz, C-2, C-3).

**<sup>31</sup>P NMR** (121 MHz, CDCl<sub>3</sub>, 298 K): δ [ppm] = 14.2

**FT-IR (ATR)**:  $\tilde{\nu}$  [cm<sup>-1</sup>] = 2960 (m), 2864 (m), 1490 (w), 1449 (w), 1345 (w), 1292 (w), 1222 (s), 1202 (s), 1126 (m), 1076 (s), 1008 (s), 956 (w), 912 (m), 873 (w), 765 (m), 573 (s), 512 (w).

**GC-MS** (70 eV): *m/z* (%) = 257 (25, [M]<sup>+</sup>), 187 (54), 145 (8), 118 (9), 89 (7), 70 (100), 41 (11).

### 3.3. (2*S*,3*R*)-2-(2,5-Dimethoxybenzyl)-2,3-dimethylcyclohexanone (**11**)

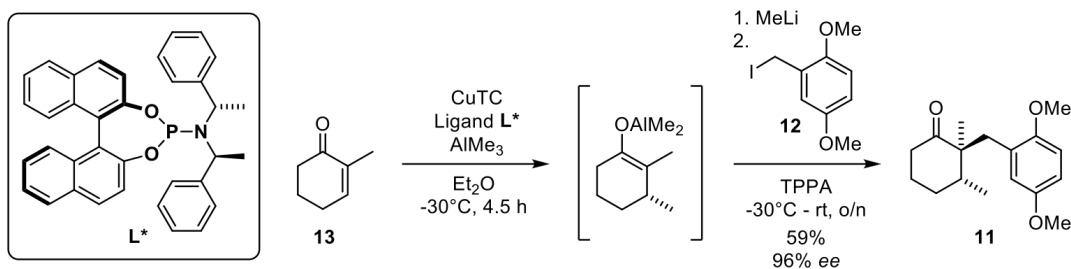

The reaction was performed in analogy to a literature procedure.<sup>[7]</sup> In a *Schlenk* flask a solution of 173 mg (0.908 mmol, 0.024 eq.) of CuTC and 980 mg (1.82 mmol, 0.047 eq.) of the phosphoramidite ligand **L\*** in 100 mL of dry Et<sub>2</sub>O was stirred at rt for 20 min. The salmon-colored solution was cooled to -30°C and 4.24 g (38.5 mmol, 1.00 eq.) of enone **13** were added. Then, 27.2 mL (54.5 mmol, 1.42 eq.) of AlMe<sub>3</sub> (2.0 M in heptane) were added via syringe over a period of 10 min. The reaction mixture was stirred at -30°C for 4.5 h, until TLC indicated full conversion of the starting material. The solvents were removed *in vacuo* at -30°C (using the *Schlenk* line) until a small volume remained, which was dissolved in 40 mL of TPPA before 34.1 mL (54.5 mmol, 1.42 eq.) of methylolithium (1.6 M in Et<sub>2</sub>O) were added over 5 min (still at -30 °C). Finally, 20.2 g (72.6 mmol, 1.89 eq.) of iodide **12** were added and the stirred suspension was allowed to slowly warm up to rt overnight. At this point, GC-MS analysis indicated full conversion of the 1,4-addition intermediate and a diastereoselectivity of *dr* = 5:1. The reaction mixture was carefully quenched by addition of 20 mL of sat. aqueous NH<sub>4</sub>Cl at 0°C before 200 mL of H<sub>2</sub>O and 100 mL of sat. aqueous Na K tartrate solution were added (to facilitate phase separation). The aqueous phase was extracted with 4 x 200 mL of *c*-Hex, the combined organic phases were dried over Na<sub>2</sub>SO<sub>4</sub> and the solvent was removed under reduced pressure. The crude product was purified by silica gel column chromatography (*c*-Hex/EtOAc 33:1) to give 6.34 g (22.9 mmol, 59%) of the pure *trans*-product **11** as a pale yellow solid. This product showed an enantiomeric excess of 96% *ee* as determined by chiral HPLC using a racemic standard (for details see section 8). In addition, a sample of the separated *cis*-byproduct *epi*-**11** was obtained and used for analytical characterization (see below).

#### Data of the *trans*-product **11**:

**C<sub>17</sub>H<sub>24</sub>O<sub>3</sub>** (**M** = 276.38 g/mol)

**R<sub>f</sub>** (*c*-Hex/EtOAc 9:1) = 0.32

**m.p.**: 50.4°C – 53.5°C

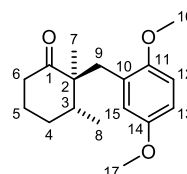



**<sup>1</sup>H NMR** (500 MHz, CDCl<sub>3</sub>, 298 K):  $\delta$  [ppm] = 6.72 (d,  $J$  = 8.9 Hz, 1H, 12-H), 6.70 – 6.66 (m, 2H, 13-H, 15-H), 3.72 (s, 3H, 17-H), 3.68 (s, 3H, 16-H), 3.17 (d,  $J$  = 13.6 Hz, 1H, 9-H<sub>a</sub>), 2.90 (d,  $J$  = 13.6 Hz, 1H, 9-H<sub>b</sub>), 2.72 (ddd,  $J$  = 14.5, 9.9, 6.6 Hz, 1H, 6-H<sub>a</sub>), 2.32 (dt,  $J$  = 14.5, 5.8 Hz, 1H, 6-H<sub>b</sub>), 2.08 (ddt,  $J$  = 13.7, 9.1, 4.4 Hz, 1H, 4-H<sub>a</sub>), 2.01 – 1.93 (m, 1H, 3-H), 1.88 (dtt,  $J$  = 14.6, 9.8, 5.0 Hz, 1H, 5-H<sub>a</sub>), 1.82 – 1.74 (m, 1H, 5-H<sub>b</sub>), 1.49 (dtd,  $J$  = 13.4, 6.5, 4.5 Hz, 1H, 4-H<sub>b</sub>), 0.91 (d,  $J$  = 7.0 Hz, 3H, 8-H), 0.89 (s, 3H, 7-H).

**<sup>13</sup>C NMR** (126 MHz, CDCl<sub>3</sub>, 298 K):  $\delta$  [ppm] = 216.2 (C-1), 153.1 (C-14), 152.3 (C-11), 128.2 (C-10), 118.5 (C-15), 111.8 (C-13), 111.2 (C-12), 55.7 (C-17), 55.5 (C-16), 53.6 (C-2), 40.2 (C-3), 38.4 (C-6), 37.2 (C-9), 28.7 (C-4), 23.0 (C-5), 18.9 (C-7), 16.4 (C-8).

**FT-IR (ATR):**  $\tilde{\nu}$  [cm<sup>-1</sup>] = 2988 (w), 2935 (m), 2871 (w), 2833 (w), 1700 (s), 1610 (w), 1589 (w), 1498 (s), 1462 (m), 1426 (w), 1382 (w), 1351 (w), 1313 (w), 1222 (s), 1179 (w), 1158 (w), 1122 (w), 1107 (w), 1091 (w), 1048 (s), 1027 (w), 946 (w), 918 (w), 874 (w), 800 (m), 716 (m), 623 (w), 588 (w), 557 (w), 532 (w).

**GC-MS** (70 eV):  $m/z$  (%) = 276 (29, [M]<sup>+</sup>), 151 (100), 121 (22), 91 (12), 77 (9), 65 (6), 55 (9).

|                    |                               |                               |
|--------------------|-------------------------------|-------------------------------|
| <b>HRMS</b> (ESI): | Calc. [amu]                   | Found [amu]                   |
|                    | 277.17982 [M+H] <sup>+</sup>  | 277.18007 [M+H] <sup>+</sup>  |
|                    | 299.16177 [M+Na] <sup>+</sup> | 299.16179 [M+Na] <sup>+</sup> |

$[\alpha]_D^{20}$  ( $c$  = 0.65 g/100 mL, CHCl<sub>3</sub>): + 76° (436 nm), + 35° (546 nm), + 29° (579 nm), + 27° (589 nm).

**X-ray crystal structure** (CCDC 2077905):

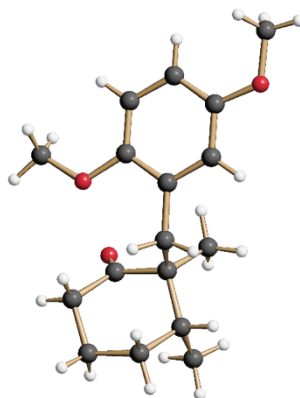

Data of the cis-product epi-11:

**C<sub>17</sub>H<sub>24</sub>O<sub>3</sub>** ( $M$  = 276.38 g/mol)

$R_f$  ( $c$ -Hex/EtOAc 9:1) = 0.25

**m.p.:** 61 °C – 63 °C

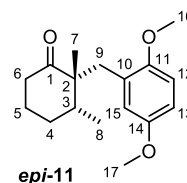

**<sup>1</sup>H NMR** (500 MHz, CDCl<sub>3</sub>, 298 K):  $\delta$  [ppm] = 6.70 – 6.64 (m, 2H, 12-H, 13-H), 6.57 (d,  $J$  = 2.6 Hz, 1H, 15-H), 3.71 (s, 3H, 17-H), 3.63 (s, 3H, 16-H), 3.22 (d,  $J$  = 13.5 Hz, 1H, 9-H<sub>a</sub>), 3.06 (td,  $J$  = 13.4, 6.4 Hz, 1H, 6-H<sub>a</sub>), 2.60 (d,  $J$  = 13.5 Hz, 1H, 9-H<sub>b</sub>), 2.36 – 2.30 (m, 1H, 6-H<sub>b</sub>), 2.02 (ddq,  $J$  = 9.3, 6.1, 3.1 Hz, 1H, 5-H<sub>a</sub>), 1.84 – 1.75 (m, 1H, 4-H<sub>a</sub>), 1.75 – 1.68 (m, 1H, 3-H), 1.68 – 1.60 (m, 2H, 4-H<sub>b</sub>, 5-H<sub>b</sub>), 1.10 (d,  $J$  = 6.4 Hz, 3H, 8-H), 0.88 (s, 3H, 7-H).

**<sup>13</sup>C NMR** (126 MHz, CDCl<sub>3</sub>, 298 K):  $\delta$  [ppm] = 214.9 (C-1), 153.0 (C-14), 152.1 (C-11), 127.5 (C-10), 118.5 (C-15), 111.6 (C-13), 110.9 (C-12), 55.7 (C-17), 55.2 (C-16), 53.1 (C-2), 44.7 (C-3), 38.5 (C-6), 31.8 (C-9), 29.8 (C-4), 26.4 (C-5), 19.9 (C-7), 16.1 (C-8).

**FT-IR (ATR):**  $\tilde{\nu}$  [cm<sup>-1</sup>] = 2964 (m), 2919 (m), 2859 (w), 2834 (w), 1696 (s), 1607 (w), 1501 (s), 1465 (m), 1450 (m), 1417 (w), 1382 (w), 1371 (w), 1356 (w), 1339 (w), 1323 (w), 1313 (w), 1297 (w), 1267 (w), 1222 (s), 1194 (w), 1179 (m), 1159 (w), 1125 (w), 1099 (w), 1089 (w), 1068 (w), 1037 (s), 1017 (m), 947 (w), 915 (w), 874 (m), 855 (w), 832 (w), 803 (m), 742 (w), 708 (m), 629 (w), 595 (w), 573 (w), 538 (w).

**GC-MS** (70 eV):  $m/z$  (%) = 276 (27, [M]<sup>+</sup>), 151 (100), 121 (24), 91 (14), 77 (11), 65 (8), 55 (12).

|                    |                               |                               |
|--------------------|-------------------------------|-------------------------------|
| <b>HRMS</b> (ESI): | Calc. [amu]                   | Found [amu]                   |
|                    | 277.17982 [M+H] <sup>+</sup>  | 277.17961 [M+H] <sup>+</sup>  |
|                    | 299.16177 [M+Na] <sup>+</sup> | 299.16133 [M+Na] <sup>+</sup> |

$[\alpha]_D^{20}$  ( $c = 0.53$  g/100 mL,  $\text{CHCl}_3$ ):  $-111^\circ$  (436 nm),  $-62^\circ$  (546 nm),  $-54^\circ$  (579 nm),  $-53^\circ$  (589 nm).

**X-ray crystal structure** (CCDC 2077912):

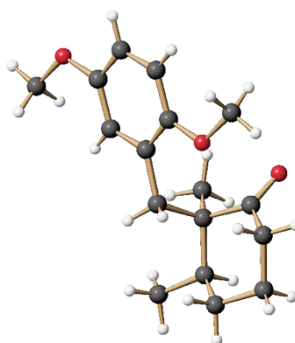

### 3.4. Synthesis of enol triflate **14**

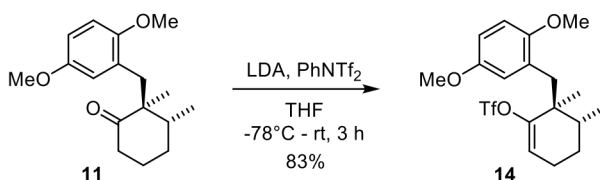

In a *Schlenk* flask a solution of 5.78 g (54.0 mmol, 1.70 eq.) of LDA in 250 mL of dry THF was cooled to  $-78^\circ\text{C}$  before 8.77 g (31.7 mmol, 1.00 eq.) of ketone **11** in 100 mL of dry THF were added. After stirring the mixture for 10 min at  $-78^\circ\text{C}$ , 19.3 g (54.0 mmol, 1.70 eq.) of  $\text{PhNTf}_2$  were added portionwise at that temperature. Stirred was continued at  $0^\circ\text{C}$  for 50 min and at rt for 2 h before excess reagents were quenched by addition of sat. aqueous  $\text{NH}_4\text{Cl}$ . After extracting with 3 x 200 mL of EtOAc the combined organic phases were washed with  $\text{H}_2\text{O}$ , dried over  $\text{Na}_2\text{SO}_4$  and the solvent was removed under reduced pressure. Purification of the crude product by silica gel column chromatography ( $c\text{-Hex/EtOAc}$  30:1  $\rightarrow$  20:1) afforded 10.7 g (26.2 mmol, 83%) of enol triflate **14** as a yellow, viscous oil.

$\text{C}_{18}\text{H}_{23}\text{F}_3\text{O}_5\text{S}$  ( $M = 408.43$  g/mol)

$R_f$  ( $c\text{-Hex/EtOAc}$  20:1) = 0.29

$^1\text{H NMR}$  (500 MHz,  $\text{CDCl}_3$ , 298 K):  $\delta$  [ppm] = 6.78 – 6.75 (m, 1H, 12-H), 6.75 – 6.71 (m, 2H, 13-H, 15-H), 5.77 (dd,  $J = 5.3, 3.0$  Hz, 1H, 6-H), 3.74 (s, 3H, 16-H), 3.73 (s, 3H, 17-H), 3.00 (d,  $J = 13.9$  Hz, 1H, 9- $\text{H}_a$ ), 2.70 (d,  $J = 13.8$  Hz, 1H, 9- $\text{H}_b$ ), 2.08 (dtd,  $J = 17.8, 5.4, 4.3$  Hz, 1H, 5- $\text{H}_a$ ), 1.94 (dddd,  $J = 17.8, 8.8, 5.6, 3.0$  Hz, 1H, 5- $\text{H}_b$ ), 1.64 (dq,  $J = 9.8, 6.8, 3.0$  Hz, 1H, 3-H), 1.60 – 1.53 (m, 1H, 4- $\text{H}_a$ ), 1.42 – 1.33 (m, 1H, 4- $\text{H}_b$ ), 1.11 (s, 3H, 7-H), 0.97 (d,  $J = 6.8$  Hz, 3H, 8-H).

$^{13}\text{C NMR}$  (126 MHz,  $\text{CDCl}_3$ , 298 K):  $\delta$  [ppm] = 154.5 (C-1), 153.3 (C-14), 152.7 (C-11), 127.2 (C-10), 118.6 (q,  $J_{\text{C,F}} = 319.3$  Hz, C-18), 118.0 (C-6), 117.1 (C-15), 112.7 (C-13), 111.3 (C-12), 55.74 (C-16), 55.65 (C-17), 43.9 (C-2), 35.2 (C-9), 34.6 (C-3), 26.2 (C-4), 23.3 (C-5), 20.1 (C-7), 16.2 (C-8).

$^{19}\text{F NMR}$  (282 MHz,  $\text{CDCl}_3$ , 298 K):  $\delta$  [ppm] =  $-75.0$

**FT-IR (ATR)**:  $\tilde{\nu}$  [ $\text{cm}^{-1}$ ] = 2935 (br), 2835 (w), 1674 (w), 1609 (w), 1589 (w), 1501 (m), 1465 (m), 1408 (m), 1386 (m), 1347 (w), 1314 (w), 1301 (w), 1284 (w), 1270 (w), 1245 (m), 1208 (s), 1189 (m), 1141 (m), 1103 (w), 1081 (w), 1049 (m), 1029 (m), 1012 (m), 983 (s), 959 (w), 918 (m), 904 (m), 869 (s), 855 (s), 802 (m), 773 (w), 756 (m), 737 (w), 716 (m), 709 (m), 689 (m), 689 (w), 648 (w), 605 (s).

**GC-MS** (70 eV):  $m/z$  (%) = 408 (20,  $[\text{M}]^+$ ), 151 (100), 121 (19), 91 (9), 69 (9), 55 (5).

**HRMS** (ESI):

Calc. [amu]  
431.11105  $[\text{M}+\text{Na}]^+$

Found [amu]  
431.11125  $[\text{M}+\text{Na}]^+$

$[\alpha]_D^{20}$  ( $c = 0.59$  g/100 mL,  $\text{CHCl}_3$ ):  $+44^\circ$  (436 nm),  $+26^\circ$  (546 nm),  $+23^\circ$  (579 nm),  $+23^\circ$  (589 nm).

3.5. But-3-en-1-yloxy(*tert*-butyl)dimethylsilane (**15**)<sup>[8]</sup>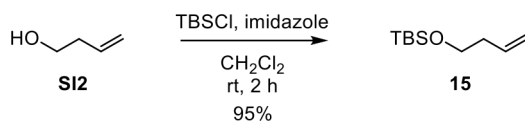

To a solution of 5.89 mL (4.94 g, 69.3 mmol, 1.00 eq.) of homoallylic alcohol (**12**) in 150 mL of dry  $\text{CH}_2\text{Cl}_2$  were added 9.44 g (139 mmol, 2.00 eq.) of imidazole and the resulting suspension was stirred under argon until a clear solution was obtained. Then, 11.5 g (76.3 mmol, 1.10 eq.) of TBSCl were added and stirring was continued for 2 h at rt before 200 mL of  $\text{H}_2\text{O}$  were added. The aqueous phase was extracted with 2 x 100 mL of  $\text{CH}_2\text{Cl}_2$ . The combined organic phases were dried over  $\text{Na}_2\text{SO}_4$  and the solvent was removed under reduced pressure. Filtration through a short plug of silica gel (*c*-Hex/EtOAc 5:1) afforded 12.3 g (66.0 mmol, 95%) of **15** as a volatile, colorless liquid.

$\text{C}_{10}\text{H}_{22}\text{OSi}$  ( $M = 186.37$  g/mol)

$R_f$  (*c*-Hex/EtOAc 3:1) = 0.90

$^1\text{H NMR}$  (500 MHz,  $\text{CDCl}_3$ , 298 K):  $\delta$  [ppm] = 5.81 (ddt,  $J = 17.1, 10.2, 6.9$  Hz, 1H, 2-H), 5.07 (dq,  $J = 17.2, 1.5$  Hz, 1H, 1-H<sub>a</sub>), 5.03 – 5.00 (m, 1H, 1-H<sub>b</sub>), 3.66 (t,  $J = 6.8$  Hz, 2H, 4-H), 2.28 (qt,  $J = 6.8, 1.2$  Hz, 2H, 3-H), 0.90 (s, 9H, 6-H, 7-H, 8-H), 0.05 (s, 6H, 9-H, 10-H).

$^{13}\text{C NMR}$  (75 MHz,  $\text{CDCl}_3$ , 298 K):  $\delta$  [ppm] = 135.5 (C-2), 116.4 (C-1), 62.9 (C-4), 37.6 (C-3), 26.1 (C-6, C-7, C-8), -5.1 (C-9, C-10).

**FT-IR (ATR)**:  $\tilde{\nu}$  [ $\text{cm}^{-1}$ ] = 3080 (w), 2955 (w), 2929 (m), 2897 (w), 2858 (m), 1642 (w), 1472 (w), 1463 (w), 1432 (w), 1408 (w), 1384 (w), 1361 (w), 1254 (m), 1228 (w), 1096 (s), 1005 (w), 986 (m), 938 (w), 909 (m), 833 (s), 810 (m), 733 (w), 678 (w), 664 (w), 626 (w).

**GC-MS** (70 eV):  $m/z$  (%) = 129 (66), 101 (100), 89 (18), 73 (30), 59 (16), 41 (18).

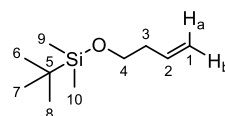3.6. Synthesis of silyl ether **16** through Suzuki cross coupling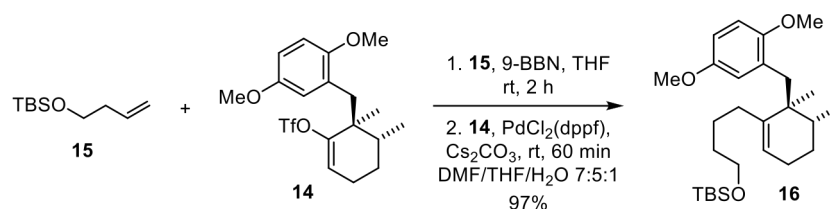

The reaction was performed in analogy to a literature protocol.<sup>[9]</sup> In a *Schlenk* flask, a solution of 7.14 g (38.3 mmol, 1.50 eq.) of olefin **15** in 55 mL of dry THF was cooled to 0 °C. Then, 92.0 mL (46.0 mmol, 1.80 eq.) of 9-BBN (0.5 M in THF) were added and the mixture was stirred at rt for 2 h. The solution was then cooled to 0 °C before 27.5 mL of  $\text{H}_2\text{O}$  were added and stirring was continued for 60 min at 0 °C. This borane solution was then transferred via needle to a second *Schlenk* flask charged with a solution of 625 mg (0.765 mmol, 0.030 eq.) of  $\text{PdCl}_2(\text{dppf}) \times \text{CH}_2\text{Cl}_2$ , 20.8 g (63.8 mmol, 2.50 eq.) of  $\text{Cs}_2\text{CO}_3$  and 10.4 g (25.5 mmol, 1.00 eq.) of the enol triflate **14** in 190 mL of dry DMF at rt. The black reaction mixture was stirred at rt for 60 min before 0.40 g of QuadraSil AP® were added as a metal scavenger and the suspension was stirred for further 30 min. Then the solids were separated by decantation and  $\text{H}_2\text{O}$  and brine were added to the product solution. After extraction with EtOAc (4x) the combined organic layers were washed with  $\text{H}_2\text{O}$ , dried over  $\text{Na}_2\text{SO}_4$  and the solvents were removed under reduced pressure. The residue was purified by silica gel column chromatography (*c*-Hex/EtOAc 20:1) to yield 11.1 g (24.8 mmol, 97%) of silyl ether **16** as a yellow, viscous oil.

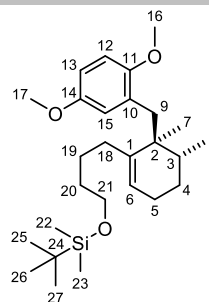

**C<sub>27</sub>H<sub>46</sub>O<sub>3</sub>Si** (**M** = 446.75 g/mol)

**R<sub>f</sub>** (*c*-Hex/EtOAc 15:1) = 0.42

**<sup>1</sup>H NMR** (500 MHz, CDCl<sub>3</sub>, 298 K):  $\delta$  [ppm] = 6.78 (d, *J* = 3.1 Hz, 1H, 15-H), 6.75 (d, *J* = 8.8 Hz, 1H, 12-H), 6.68 (dd, *J* = 8.8, 3.1 Hz, 1H, 13-H), 5.46 (t, *J* = 3.8 Hz, 1H, 6-H), 3.75 (s, 3H, 16-H), 3.72 (s, 3H, 17-H), 3.62 (t, *J* = 6.3 Hz, 2H, 21-H), 2.93 (d, *J* = 14.6 Hz, 1H, 9-H<sub>a</sub>), 2.66 (d, *J* = 14.6 Hz, 1H, 9-H<sub>b</sub>), 2.04 (t, *J* = 7.1 Hz, 2H, 18-H), 2.02 – 1.91 (m, 2H, 5-H), 1.78 (dtd, *J* = 12.9, 6.5, 3.2 Hz, 1H, 4-H<sub>a</sub>), 1.70 (quint of d, *J* = 7.0, 3.1 Hz, 1H, 3-H), 1.59 – 1.53 (m, 2H, 20-H), 1.53 – 1.42 (m, 2H, 19-H), 1.40 – 1.32 (m, 1H, 4-H<sub>b</sub>), 0.93 (s, 3H, 7-H), 0.90 (s, 9H, 25-H, 26-H, 27-H), 0.80 (d, *J* = 6.8 Hz, 3H, 8-H), 0.05 (s, 6H, 22-H, 23-H).

**<sup>13</sup>C NMR** (126 MHz, CDCl<sub>3</sub>, 298 K):  $\delta$  [ppm] = 153.1 (C-14), 152.6 (C-11), 143.3 (C-1), 129.6 (C-10), 121.4 (C-6), 117.3 (C-15), 111.24 (C-12), 111.19 (C-13), 63.5 (C-21), 56.0 (C-16), 55.7 (C-17), 42.0 (C-2), 36.3 (C-9), 33.8 (C-3), 33.3 (C-20), 31.3 (C-18), 26.5 (C-4), 26.1 (C-25, C-26, C-27), 25.5 (C-19), 23.9 (C-5), 21.8 (C-7), 18.5 (C-24), 16.1 (C-8), –5.1 (C-22, C-23).

**FT-IR (ATR):**  $\tilde{\nu}$  [cm<sup>-1</sup>] = 2951 (br), 2929 (m), 2906 (w), 2857 (w), 2833 (w), 1609 (w), 1588 (w), 1498 (m), 1463 (m), 1426 (w), 1380 (w), 1360 (w), 1298 (w), 1282 (w), 1254 (m), 1219 (s), 1179 (w), 1158 (w), 1099 (m), 1051 (m), 1030 (m), 1005 (w), 964 (w), 939 (w), 901 (w), 834 (s), 804 (m), 795 (m), 773 (s), 732 (w), 714 (m), 686 (w), 661 (w), 606 (w).

**GC-MS** (70 eV): *m/z* (%) = 446 (17, [M]<sup>+</sup>), 389 (17), 295 (8), 237 (7), 163 (100), 152 (48), 147 (10), 121 (22), 107 (16), 91 (15), 75 (14).

**HRMS** (ESI):

Calc. [amu]

Found [amu]

447.32889 [M+H]<sup>+</sup>

447.32930 [M+H]<sup>+</sup>

469.31084 [M+Na]<sup>+</sup>

469.31088 [M+Na]<sup>+</sup>

**[ $\alpha$ ]<sup>20</sup><sub>D</sub>** (*c* = 0.51 g/100 mL, CHCl<sub>3</sub>): – 51° (436 nm), – 27° (546 nm), – 24° (579 nm), – 21° (589 nm).

### 3.7. Synthesis of alcohol **S13**

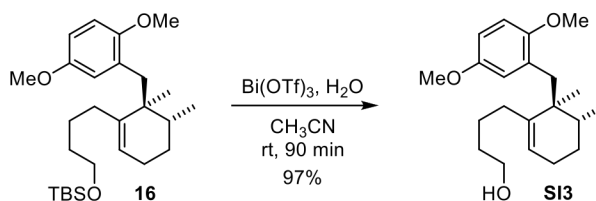

In an argon-flushed flask 11.1 g (24.8 mmol, 1.00 eq.) of silyl ether **16** were dissolved in 400 mL of CH<sub>3</sub>CN and 4.5 mL (4.5 g, 250 mmol, 10 eq.) of H<sub>2</sub>O. Then, 650 mg (0.99 mmol, 0.04 eq.) of Bi(OTf)<sub>3</sub> were added and the reaction mixture was stirred at rt for 90 min. 200 mL of H<sub>2</sub>O were added and the aqueous phase was extracted with 3 x 200 mL of CH<sub>2</sub>Cl<sub>2</sub>. The combined organic phases were washed with H<sub>2</sub>O, dried over MgSO<sub>4</sub> and the solvent was removed under reduced pressure. 7.98 g (24.0 mmol, 97%) of alcohol **S13**, together with 1.48 g of TBSOH/TBSOTBS were obtained as a pale yellow, viscous oil. The crude alcohol **S13** was used for the following reaction without further purification. For analytical characterization, a sample of was purified by silica gel column chromatography (*c*-Hex/MTBE 2:1).

**C<sub>21</sub>H<sub>32</sub>O<sub>3</sub>** (**M** = 332.48 g/mol)

**R<sub>f</sub>** (*c*-Hex/EtOAc 4:1) = 0.22

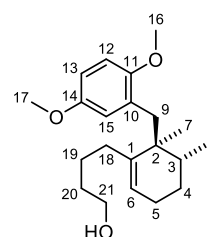

**<sup>1</sup>H NMR** (500 MHz, CDCl<sub>3</sub>, 298 K):  $\delta$  [ppm] = 6.77 (d,  $J$  = 3.5 Hz, 1H, 15-H), 6.76 (d,  $J$  = 9.1 Hz, 1H, 12-H), 6.68 (dd,  $J$  = 8.8, 3.1 Hz, 1H, 13-H), 5.47 (t,  $J$  = 3.6 Hz, 1H, 6-H), 3.75 (s, 3H, 16-H), 3.73 (s, 3H, 17-H), 3.65 (t,  $J$  = 6.4 Hz, 2H, 21-H), 2.92 (d,  $J$  = 14.6 Hz, 1H, 9-H<sub>a</sub>), 2.66 (d,  $J$  = 14.5 Hz, 1H, 9-H<sub>b</sub>), 2.07 – 2.02 (m, 2H, 18-H), 2.02 – 1.92 (m, 2H, 5-H), 1.79 (dtd,  $J$  = 13.0, 6.6, 3.2 Hz, 1H, 4-H<sub>a</sub>), 1.71 (quint of d,  $J$  = 7.0, 3.2 Hz, 1H, 3-H), 1.65 – 1.57 (m, 2H, 20-H), 1.57 – 1.44 (m, 2H, 19-H), 1.36 (td,  $J$  = 13.5, 6.3 Hz, 1H, 4-H<sub>b</sub>), 0.93 (s, 3H, 7-H), 0.81 (d,  $J$  = 6.9 Hz, 3H, 8-H).

**<sup>13</sup>C NMR** (126 MHz, CDCl<sub>3</sub>, 298 K):  $\delta$  [ppm] = 153.1 (C-14), 152.6 (C-11), 143.0 (C-1), 129.6 (C-10), 121.5 (C-6), 117.5 (C-15), 111.2 (C-12), 111.1 (C-13), 63.2 (C-21), 56.0 (C-16), 55.7 (C-17), 42.0 (C-2), 36.4 (C-9), 33.8 (C-3), 33.2 (C-20), 31.2 (C-18), 26.4 (C-4), 25.4 (C-19), 23.8 (C-5), 21.8 (C-7), 16.0 (C-8).

**FT-IR (ATR):**  $\tilde{\nu}$  [cm<sup>-1</sup>] = 3354 (br), 2933 (br), 2834 (w), 1611 (w), 1592 (w), 1499 (s), 1463 (m), 1379 (w), 1282 (w), 1271 (w), 1221 (s), 1179 (w), 1159 (w), 1126 (w), 1051 (m), 1045 (m), 1029 (m), 878 (w), 800 (w), 717 (w).

**GC-MS** (70 eV):  $m/z$  (%) = 332 (40, [M]<sup>+</sup>), 181 (43), 152 (79), 151 (65), 137 (29), 121 (100), 107 (56), 91 (73), 79 (47), 71 (29), 55 (40).

**HRMS (ESI):**

Calc. [amu]

Found [amu]

355.22437 [M+Na]<sup>+</sup>

355.22478 [M+Na]<sup>+</sup>

**[ $\alpha$ ]<sup>20</sup><sub>D</sub>** ( $c$  = 0.67 g/100 mL, CHCl<sub>3</sub>): – 59° (436 nm), – 30° (546 nm), – 26° (579 nm), – 25° (589 nm).

### 3.8. Synthesis of aldehyde 10

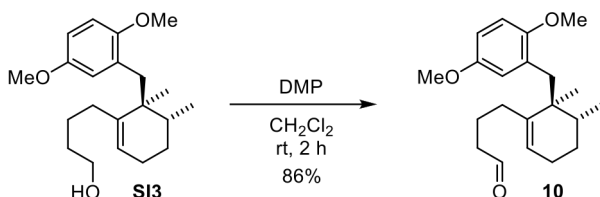

A solution of 7.98 g (24.0 mmol, 1.00 eq.) of alcohol **SI3** (in a mixture with 1.48 g of TBSOH/TBSOTBS) were dissolved in 630 mL of dry CH<sub>2</sub>Cl<sub>2</sub>. The solution was cooled to 0°C and 21.0 g (49.6 mmol, 2.00 eq.) of Dess Martin's reagent were added over 5 min and stirring was continued for 15 min at 0°C and 2 h at rt. Then, the mixture was cooled to 0°C before 200 mL of H<sub>2</sub>O were added. The phases were separated and the aqueous phase was extracted with 3 x 200 mL of CH<sub>2</sub>Cl<sub>2</sub>. The combined organic phases were washed with H<sub>2</sub>O, dried over Na<sub>2</sub>SO<sub>4</sub> and the solvent was removed under reduced pressure. The residue was purified by silica gel column chromatography (ultrapure SiO<sub>2</sub>, *c*-Hex/EtOAc 9:1) to provide 6.83 g (20.7 mmol, 86%) of aldehyde **10** as a yellowish viscous oil.

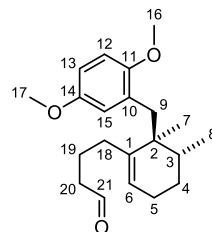

**C<sub>21</sub>H<sub>30</sub>O<sub>3</sub>** (**M** = 330.47 g/mol)

**R<sub>f</sub>** (*c*-Hex/EtOAc 9:1) = 0.27

**<sup>1</sup>H NMR** (500 MHz, CDCl<sub>3</sub>, 298 K):  $\delta$  [ppm] = 9.77 (t,  $J$  = 1.8 Hz, 1H, 21-H), 6.754 (d,  $J$  = 8.6 Hz, 1H, 12-H), 6.749 (d,  $J$  = 3.6 Hz, 1H, 15-H), 6.68 (dd,  $J$  = 8.9, 3.0 Hz, 1H, 13-H), 5.48 (t,  $J$  = 3.7 Hz, 1H, 6-H), 3.75 (s, 3H, 16-H), 3.73 (s, 3H, 17-H), 2.90 (d,  $J$  = 14.5 Hz, 1H, 9-H<sub>a</sub>), 2.64 (d,  $J$  = 14.4 Hz, 1H, 9-H<sub>b</sub>), 2.46 (td,  $J$  = 7.2, 1.6 Hz, 2H, 20-H), 2.09 – 2.02 (m, 2H, 18-H), 2.02 – 1.92 (m, 2H, 5-H), 1.90 – 1.77 (m, 3H, 4-H<sub>a</sub>, 19-H), 1.73 (qq,  $J$  = 7.0, 3.2 Hz, 1H, 3-H), 1.37 (ddt,  $J$  = 13.4, 7.5, 6.1 Hz, 1H, 4-H<sub>b</sub>), 0.92 (s, 3H, 7-H), 0.81 (d,  $J$  = 6.9 Hz, 3H, 8-H).

**<sup>13</sup>C NMR** (126 MHz, CDCl<sub>3</sub>, 298 K):  $\delta$  [ppm] = 203.0 (C-21), 153.1 (C-11), 152.6 (C-14), 142.3 (C-1), 129.4 (C-10), 122.1 (C-6), 117.6 (C-15), 111.2 (C-12/13), 111.1 (C-12/13), 56.0 (C-16), 55.7 (C-17), 44.1 (C-20), 42.0 (C-2), 36.6 (C-9), 33.8 (C-3), 30.9 (C-18), 26.3 (C-4), 23.7 (C-5), 21.8 (C-19), 21.7 (C-7), 16.0 (C-8).

**FT-IR (ATR):**  $\tilde{\nu}$  [ $\text{cm}^{-1}$ ] = 2932 (br), 2833 (w), 2718 (w), 1723 (m), 1608 (w), 1588 (w), 1497 (s), 1463 (m), 1425 (w), 1379 (w), 1283 (w), 1268 (w), 1218 (s), 1179 (m), 1158 (w), 1127 (w), 1074 (w), 1048 (s), 1028 (m), 952 (w), 940 (w), 909 (w), 873 (w), 849 (w), 799 (m), 757 (w), 732 (w), 714 (m), 687 (w), 637 (w).

**GC-MS** (70 eV):  $m/z$  (%) = 330 (30,  $[\text{M}]^+$ ), 207 (8), 179 (13), 161 (83), 151 (85), 135 (36), 121 (100), 105 (56), 91 (96), 77 (60), 55 (37).

**HRMS** (ESI):

|  |                                    |                                    |
|--|------------------------------------|------------------------------------|
|  | Calc. [amu]                        | Found [amu]                        |
|  | 353.20871 $[\text{M}+\text{Na}]^+$ | 353.20897 $[\text{M}+\text{Na}]^+$ |

$[\alpha]^{20}_D$  ( $c = 0.57$  g/100 mL,  $\text{CHCl}_3$ ):  $-80^\circ$  (436 nm),  $-41^\circ$  (546 nm),  $-34^\circ$  (579 nm),  $-32^\circ$  (589 nm).

### 3.9. Synthesis of olefin 17

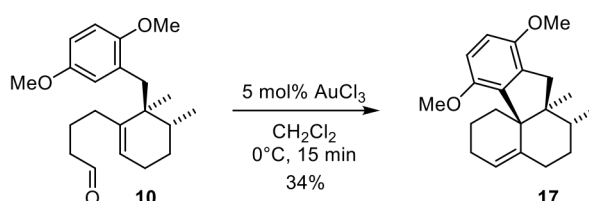

A solution of 2.00 g (6.05 mmol, 1.00 eq.) of aldehyde **10** in 600 mL of  $\text{CH}_2\text{Cl}_2$  (HPLC grade) was cooled to  $0^\circ\text{C}$  and 94 mg (0.31 mmol, 0.051 eq.) of  $\text{AuCl}_3$  were added. The dark green mixture was stirred for 15 min at  $0^\circ\text{C}$  before 620 mg of QuadraSil TA® (0.5 mmol/g) were added and the suspension was stirred for further 30 min at  $0^\circ\text{C}$  (discoloration). The solids were separated by filtration and the solvent was removed under reduced pressure. The resulting pale brown, viscous oil was purified by silica gel column chromatography ( $c$ -Hex/EtOAc 30:1) to give 825 mg of a colorless sticky oil, containing approximately 644 mg (2.06 mmol, 34%) of olefin **17** along with inseparable (at this stage) side products, as determined by integration of suitable  $^1\text{H}$  NMR signals. On a 100 mg scale a yield of 38% of **17** was obtained (37% for a 300 mg scale). The oil crystallizes very slowly at rt. A sample of the ketone side product **S18** (single diastereomer) was also obtained and characterized (see below).

#### Data of **17**:

**C**<sub>21</sub>**H**<sub>28</sub>**O**<sub>2</sub> (**M** = 312.45 g/mol)

**R**<sub>f</sub> ( $c$ -Hex/EtOAc 20:1) = 0.27

**m.p.**:  $86^\circ\text{C} - 88^\circ\text{C}$

**$^1\text{H}$  NMR** (500 MHz,  $\text{CDCl}_3$ , 298 K):  $\delta$  [ppm] = 6.63 (s, 2H, 12-H, 13-H), 5.61 (td,  $J = 3.9, 1.7$  Hz, 1H, 18-H), 3.78 (s, 3H, 16-H), 3.68 (s, 3H, 17-H), 2.83 (d,  $J = 15.8$  Hz, 1H, 9-H<sub>a</sub>), 2.54 (d,  $J = 15.8$  Hz, 1H, 9-H<sub>b</sub>), 2.09 (dt,  $J = 13.1, 3.3$  Hz, 1H, 5-H<sub>a</sub>), 2.05 – 2.01 (m, 2H, 19-H), 2.01 – 1.95 (m, 1H, 5-H<sub>b</sub>), 1.92 (ddd,  $J = 12.8, 9.5, 2.9$  Hz, 1H, 21-H<sub>a</sub>), 1.64 (ddtd,  $J = 12.6, 9.4, 6.4, 2.9$  Hz, 1H, 20-H<sub>a</sub>), 1.57 – 1.49 (m, 1H, 20-H<sub>b</sub>), 1.49 – 1.42 (m, 2H, 3-H, 21-H<sub>b</sub>), 1.36 (dq,  $J = 12.7, 3.5$  Hz, 1H, 4-H<sub>a</sub>), 1.18 (qd,  $J = 12.9, 3.9$  Hz, 1H, 4-H<sub>b</sub>), 1.00 (s, 3H, 7-H), 0.83 (d,  $J = 6.7$  Hz, 3H, 8-H).

**$^{13}\text{C}$  NMR** (126 MHz,  $\text{CDCl}_3$ , 298 K):  $\delta$  [ppm] = 151.6 (C-14), 150.9 (C-11), 141.2 (C-15), 138.3 (C-6), 131.8 (C-10), 122.5 (C-18), 110.3 (C-13), 108.8 (C-12), 56.0 (C-17), 55.8 (C-16), 55.4 (C-1), 52.2 (C-2), 38.4 (C-9), 36.3 (C-3), 35.0 (C-5), 32.5 (C-21), 32.3 (C-4), 25.9 (C-19), 20.3 (C-20), 18.2 (C-8), 14.2 (C-7).

**FT-IR (ATR):**  $\tilde{\nu}$  [ $\text{cm}^{-1}$ ] = 2924 (br), 2851 (m), 2830 (m), 1596 (w), 1491 (s), 1462 (m), 1437 (m), 1379 (w), 1323 (w), 1278 (w), 1254 (s), 1189 (w), 1157 (w), 1141 (w), 1110 (w), 1095 (m), 1070 (m), 1055 (m), 1012 (w), 972 (w), 914 (w), 883 (w), 865 (w), 788 (m), 715 (w), 669 (w), 638 (w).

**GC-MS** (70 eV):  $m/z$  (%) = 312 (100,  $[\text{M}]^+$ ), 297 (38), 255 (16), 241 (15), 227 (16), 165 (17), 115 (16), 55 (15).

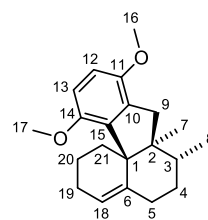

**HRMS (ESI):**

Calc. [amu]

Found [amu]

313.21620 [M+H]<sup>+</sup>313.21688 [M+H]<sup>+</sup>[ $\alpha$ ]<sup>20</sup><sub>D</sub> (c = 0.45 g/100 mL, CHCl<sub>3</sub>): + 249° (436 nm), + 131° (546 nm), + 113° (579 nm), + 107° (589 nm).**X-ray crystal structure (CCDC 2077903):**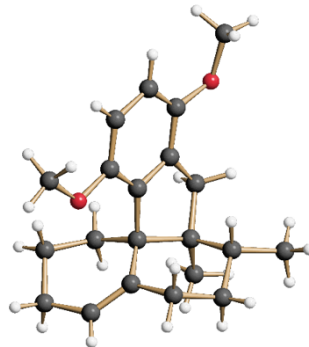Data of the ketone side product **SI8**:**C<sub>21</sub>H<sub>30</sub>O<sub>3</sub>** (M = 330.47 g/mol)**R<sub>f</sub>** (c-Hex/EtOAc 5:1) = 0.36

**<sup>1</sup>H NMR** (500 MHz, CDCl<sub>3</sub>, 298 K):  $\delta$  [ppm] = 6.74 (d, *J* = 8.8 Hz, 1H, 12-H), 6.71 (dd, *J* = 8.8, 2.9 Hz, 1H, 13-H), 6.68 (d, *J* = 2.8 Hz, 1H, 15-H), 3.74 (s, 3H, 17-H), 3.71 (s, 3H, 16-H), 2.82 (d, *J* = 14.0 Hz, 1H, 9-H<sub>a</sub>), 2.62 (d, *J* = 14.0 Hz, 1H, 9-H<sub>b</sub>), 2.46 – 2.41 (m, 1H, 21-H<sub>a</sub>), 2.35 (ddt, *J* = 13.6, 4.2, 2.1 Hz, 1H, 19-H<sub>a</sub>), 2.30 – 2.22 (m, 1H, 19-H<sub>b</sub>), 2.15 – 2.07 (m, 2H, 6-H, 20-H<sub>a</sub>), 1.73 (dq, *J* = 13.5, 3.1 Hz, 1H, 5-H<sub>a</sub>), 1.53 – 1.49 (m, 1H, 20-H<sub>b</sub>), 1.49 – 1.43 (m, 2H, 4-H<sub>a</sub>, 21-H<sub>b</sub>), 1.38 – 1.30 (m, 1H, 3-H), 1.23 – 1.18 (m, 1H, 1-H), 1.18 – 1.10 (m, 1H, 4-H<sub>b</sub>), 1.10 – 1.04 (m, 1H, 5-H<sub>b</sub>), 1.02 (d, *J* = 6.5 Hz, 3H, 8-H), 0.89 (s, 3H, 7-H).

**<sup>13</sup>C NMR** (126 MHz, CDCl<sub>3</sub>, 298 K):  $\delta$  [ppm] = 214.2 (C-18), 152.9 (C-14), 152.8 (C-11), 127.9 (C-10), 119.0 (C-15), 111.3 (C-13), 110.9 (C-12), 55.7 (C-17), 55.5 (C-16), 51.3 (C-6), 47.7 (C-1), 42.1 (C-19), 41.8 (C-2), 35.6 (C-9), 35.3 (C-3), 29.9 (C-4), 27.6 (C-21), 26.1 (C-20), 25.2 (C-5), 17.6 (C-8), 14.9 (C-7).

**FT-IR (ATR):**  $\tilde{\nu}$  [cm<sup>-1</sup>] = 2927 (s), 2855 (m), 2837 (w), 1734 (w), 1709 (m), 1590 (w), 1498 (s), 1464 (s), 1400 (w), 1379 (w), 1260 (s), 1221 (s), 1179 (w), 1159 (w), 1090 (m), 1049 (s), 1028 (m), 870 (w), 799 (s), 715 (w).

**GC-MS** (70 eV): *m/z* (%) = 330 (72, [M]<sup>+</sup>), 161 (15), 151 (100), 121 (24), 105 (13), 91 (27), 77 (17).

**HRMS (ESI):**

Calc. [amu]

Found [amu]

353.20872 [M+Na]<sup>+</sup>353.20896 [M+Na]<sup>+</sup>[ $\alpha$ ]<sup>20</sup><sub>D</sub> (c = 0.25 g/100 mL, CHCl<sub>3</sub>): – 2.7° (436 nm), + 4.7° (546 nm), + 2.7° (579 nm), – 2.7° (589 nm).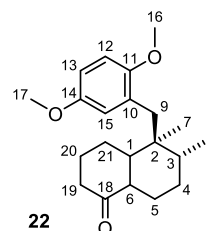

3.10. Synthesis of alcohol **SI4**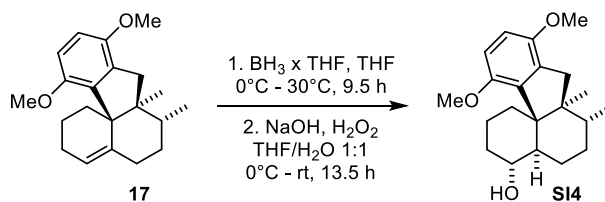

A solution of 644 mg (2.06 mmol, 1.00 eq.) of olefin **17** in 60 mL of dry THF was cooled to 0 °C and 13.5 mL (13.5 mmol, 6.55 eq.) of BH<sub>3</sub> x THF (1.0 M in THF) were added. The mixture was stirred at 0 °C for 2 h and at 30 °C for 7.5 h. Then, the solution was cooled to 0 °C before 20 mL of 10% (w/w) aqueous NaOH and 40 mL of aqueous 30% (w/v) H<sub>2</sub>O<sub>2</sub> were slowly added successively (CAUTION: The reaction with NaOH is exothermic!). The stirred mixture was left in the cooling bath overnight to slowly reach 25 °C (14 h). After re-cooling to 0 °C and careful addition of sat. aqueous Na<sub>2</sub>S<sub>2</sub>O<sub>3</sub> the mixture was allowed to reach rt before the aqueous phase was extracted three times with CH<sub>2</sub>Cl<sub>2</sub>. The combined organic phases were washed with water and brine, dried over MgSO<sub>4</sub> and the solvent was removed under reduced pressure to give a colorless, viscous oil. The crude alcohol **SI4** was used for the following reaction without further purification. For analytical characterization, a sample of the crude product was purified by silica gel column chromatography (CH<sub>2</sub>Cl<sub>2</sub>/c-Hex 4:1). The configuration of the two newly formed stereocenters was verified by <sup>1</sup>H,<sup>1</sup>H-NOESY NMR analysis.

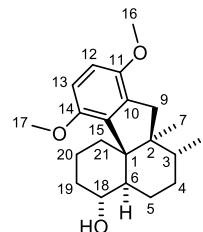

**C**<sub>21</sub>**H**<sub>30</sub>**O**<sub>3</sub> (**M** = 330.47 g/mol)

**R**<sub>f</sub> (c-Hex/EtOAc 4:1) = 0.41

**<sup>1</sup>H NMR** (500 MHz, CDCl<sub>3</sub>, 298 K): δ [ppm] = 6.67 (s, 2H, 12-H, 13-H), 4.50 (td, *J* = 10.0, 5.9 Hz, 1H, 18-H), 3.77 (s, 3H, 16-H), 3.75 (s, 3H, 17-H), 2.77 (d, *J* = 15.9 Hz, 1H, 9-H<sub>a</sub>), 2.43 (d, *J* = 15.9 Hz, 1H, 9-H<sub>b</sub>), 2.17 – 2.10 (m, 1H, 19-H<sub>a</sub>), 1.97 – 1.92 (m, 1H, 5-H<sub>a</sub>), 1.53 – 1.46 (m, 1H, 21-H<sub>a</sub>), 1.46 – 1.39 (m, 3H, 4-H<sub>a</sub>, 20-H<sub>a</sub>, 21-H<sub>b</sub>), 1.35 – 1.28 (m, 3H, 3-H, 6-H, 20-H<sub>b</sub>), 1.22 – 1.10 (m, 3H, 4-H<sub>b</sub>, 5-H<sub>b</sub>, 19-H<sub>b</sub>), 1.02 (s, 3H, 7-H), 0.77 (d, *J* = 6.7 Hz, 3H, 8-H).

**<sup>13</sup>C NMR** (126 MHz, CDCl<sub>3</sub>, 298 K): δ [ppm] = 151.3 (C-11), 150.8 (C-14), 138.8 (C-15), 132.9 (C-10), 109.7 (C-12), 109.2 (C-13), 71.1 (C-18), 59.4 (C-1), 55.8 (C-16), 55.1 (C-17), 50.9 (C-2), 47.4 (C-6), 37.7 (C-9), 36.5 (C-19), 35.2 (C-3), 35.1 (C-21), 32.0 (C-4), 25.6 (C-5), 20.9 (C-20), 18.1 (C-8), 13.3 (C-7).

**FT-IR (ATR):**  $\tilde{\nu}$  [cm<sup>-1</sup>] = 3363 (br), 2931 (s), 2854 (m), 2043 (w), 1971 (w), 1735 (br), 1594 (w), 1492 (s), 1462 (m), 1380 (w), 1324 (w), 1281 (w), 1255 (s), 1171 (w), 1148 (w), 1071 (m), 1047 (w), 1034 (w), 1004 (w), 968 (w), 941 (w), 873 (w), 848 (w), 790 (w), 719 (w).

**GC-MS** (70 eV): *m/z* (%) = 330 (52, [M]<sup>+</sup>), 312 (100), 297 (34), 258 (18), 255 (22), 243 (25), 227 (18), 203 (23), 189 (21).

|                    |                               |                               |
|--------------------|-------------------------------|-------------------------------|
| <b>HRMS</b> (ESI): | Calc. [amu]                   | Found [amu]                   |
|                    | 353.20872 [M+Na] <sup>+</sup> | 353.20865 [M+Na] <sup>+</sup> |

**[α]<sup>20</sup><sub>D</sub>** (*c* = 0.76 g/100 mL, CHCl<sub>3</sub>): – 75° (436 nm), – 44° (546 nm), – 39° (579 nm), – 37° (589 nm).



## 3.11. Synthesis of ketone 9

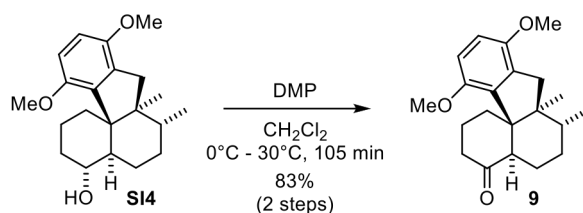

A solution of the crude alcohol **14** of the previous reaction ( $\leq 2.06$  mmol) in 72 mL of  $\text{CH}_2\text{Cl}_2$  (HPLC grade) was cooled to  $0^\circ\text{C}$  before 2.46 g (5.80 mmol, 2.82 eq.) of DMP were added over 5 min. The mixture was stirred at  $0^\circ\text{C}$  for 30 min and at  $30^\circ\text{C}$  for 75 min. After addition of  $\text{H}_2\text{O}$ , the phases were separated and the aqueous phase was extracted three times with  $\text{CH}_2\text{Cl}_2$ . The combined organic layers were washed with sat. aqueous  $\text{NaHCO}_3$  and  $\text{H}_2\text{O}$ , dried over  $\text{MgSO}_4$  and the solvent was removed under reduced pressure. The residue was purified by silica gel column chromatography (c-Hex/EtOAc 9:1) to provide 559 mg (1.70 mmol, 83% over 2 steps) of ketone **9** as a yellow sticky oil, which crystallized very slowly at rt.

$\text{C}_{21}\text{H}_{28}\text{O}_3$  ( $M = 328.45$  g/mol)

$R_f$  (c-Hex/EtOAc 9:1) = 0.24

m.p.:  $127^\circ\text{C} - 128^\circ\text{C}$

$^1\text{H NMR}$  (500 MHz,  $\text{CDCl}_3$ , 298 K):  $\delta$  [ppm] = 6.65 (d,  $J = 8.7$  Hz, 1H, 12-H), 6.61 (d,  $J = 8.8$  Hz, 1H, 13-H), 3.77 (s, 3H, 16/17-H), 3.56 (s, 3H, 16/17-H), 2.82 (d,  $J = 15.8$  Hz, 1H, 9-H<sub>a</sub>), 2.53 (d,  $J = 15.8$  Hz, 1H, 9-H<sub>b</sub>), 2.47 (ddt,  $J = 16.6, 5.0, 1.7$  Hz, 1H, 19-H<sub>a</sub>), 2.24 – 2.19 (m, 1H, 5-H<sub>a</sub>), 2.19 – 2.13 (m, 1H, 19-H<sub>b</sub>), 2.09 – 2.05 (m, 1H, 6-H), 1.81 – 1.74 (m, 1H, 21-H<sub>a</sub>), 1.74 – 1.65 (m, 2H, 20-H<sub>a</sub>, 21-H<sub>b</sub>), 1.63 – 1.53 (m, 1H, 20-H<sub>b</sub>), 1.47 – 1.41 (m, 1H, 4-H<sub>a</sub>), 1.28 – 1.20 (m, 1H, 3-H), 1.13 – 1.06 (m, 1H, 4-H<sub>b</sub>), 1.05 (s, 3H, 7-H), 1.04 – 0.98 (m, 1H, 5-H<sub>b</sub>), 0.81 (d,  $J = 6.7$  Hz, 3H, 8-H).

$^{13}\text{C NMR}$  (126 MHz,  $\text{CDCl}_3$ , 298 K):  $\delta$  [ppm] = 209.6 (C-18), 151.3 (C-11/14), 151.2 (C-11/14), 136.7 (C-15), 131.8 (C-10), 109.4 (C-12), 109.2 (C-13), 58.4 (C-1), 55.8 (C-16/17), 53.8 (C-16/17), 51.9 (C-6), 50.9 (C-2), 40.4 (C-19), 38.0 (C-9), 35.2 (C-3), 33.4 (C-21), 30.9 (C-4), 22.6 (C-5), 21.1 (C-20), 18.1 (C-8), 12.7 (C-7).

**FT-IR (ATR):**  $\tilde{\nu}$  [ $\text{cm}^{-1}$ ] = 2924 (br), 2851 (m), 1706 (s), 1597 (w), 1493 (s), 1460 (m), 1381 (w), 1354 (w), 1320 (w), 1293 (w), 1279 (m), 1259 (s), 1251 (s), 1187 (w), 1171 (w), 1146 (w), 1129 (w), 1094 (m), 1083 (m), 1068 (m), 1051 (m), 1024 (w), 1007 (w), 967 (w), 954 (w), 898 (w), 879 (w), 842 (w), 792 (m), 738 (w), 716 (w), 678 (w), 648 (w).

**GC-MS** (70 eV):  $m/z$  (%) = 328 (100,  $[\text{M}]^+$ ), 297 (97), 285 (100), 258 (31), 243 (49), 227 (18), 201 (22), 189 (20), 115 (21), 91 (12), 55 (16).

**HRMS** (ESI):

Calc. [amu]

Found [amu]

329.21112  $[\text{M}+\text{H}]^+$

329.21094  $[\text{M}+\text{H}]^+$

351.19307  $[\text{M}+\text{Na}]^+$

351.19257  $[\text{M}+\text{Na}]^+$

$[\alpha]^{20}_D$  ( $c = 0.55$  g/100 mL,  $\text{CHCl}_3$ ):  $-39^\circ$  (436 nm),  $-20^\circ$  (546 nm),  $-17^\circ$  (579 nm),  $-17^\circ$  (589 nm).

**X-ray crystal structure** (CCDC 2077914):

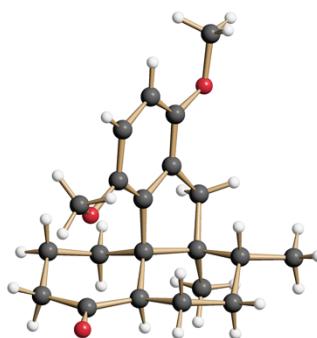

3.12. Synthesis of alcohol **26**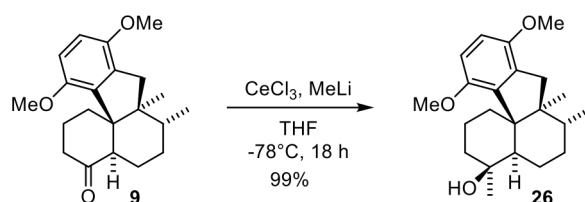

According to *Imamoto*,<sup>[10]</sup> a suspension of 311 mg (1.26 mmol, 2.30 eq.) of  $\text{CeCl}_3$  in 7.2 mL of dry THF was stirred at rt for 2.5 h (activation). Then, the mixture was cooled to  $-78^\circ\text{C}$  and 0.88 mL (1.1 mmol, 2.1 eq.) of MeLi (1.3 M in  $\text{Et}_2\text{O}$ ) were added over 2 min. After stirring at  $-78^\circ\text{C}$  for 35 min, 180 mg (0.548 mmol, 1.00 eq.) of ketone **9** in 1.8 mL of dry THF were added over 1 min. and the mixture was stirred for further 18 h at  $-78^\circ\text{C}$  the allowed to reach rt over 20 min. After additional 30 min excess reagent was quenched by addition of 20 mL of sat. aqueous  $\text{NH}_4\text{Cl}$  and 70 mL of  $\text{H}_2\text{O}$ . After extraction with 3 x 50 mL of MTBE the combined organic phases were dried over  $\text{Na}_2\text{SO}_4$  and the solvent was removed under reduced pressure to give 189 mg (0.548 mmol, 99%) of alcohol **26** as a colorless, crystalline solid.

**C<sub>22</sub>H<sub>32</sub>O** (M = 344.50 g/mol)

$R_f$  (c-Hex/EtOAc 3:1) = 0.35

m.p.:  $149^\circ\text{C} - 151^\circ\text{C}$

<sup>1</sup>H NMR (500 MHz,  $\text{CDCl}_3$ , 298 K):  $\delta$  [ppm] = 6.74 (d,  $J = 8.9$  Hz, 1H, 13-H), 6.70 (d,  $J = 8.8$  Hz, 1H, 12-H), 6.33 (s, 1H, OH), 3.85 (s, 3H, 17-H), 3.78 (s, 3H, 16-H), 2.76 (d,  $J = 16.0$  Hz, 1H, 9-H<sub>a</sub>), 2.40 (d,  $J = 16.0$  Hz, 1H, 9-H<sub>b</sub>), 1.92 – 1.83 (m, 2H, 5-H<sub>a</sub>, 19-H<sub>a</sub>), 1.60 – 1.55 (m, 1H, 6-H), 1.54 – 1.49 (m, 1H, 4-H<sub>a</sub>), 1.49 – 1.44 (m, 3H, 19-H<sub>b</sub>, 21-H), 1.44 – 1.37 (m, 1H, 20-H<sub>a</sub>), 1.37 – 1.28 (m, 2H, 3-H, 20-H<sub>b</sub>), 1.25 (d,  $J = 1.1$  Hz, 3H, 22-H), 1.24 – 1.16 (m, 2H, 4-H<sub>b</sub>, 5-H<sub>b</sub>), 0.99 (s, 3H, 7-H), 0.76 (d,  $J = 6.7$  Hz, 3H, 8-H).

<sup>13</sup>C NMR (126 MHz,  $\text{CDCl}_3$ , 298 K):  $\delta$  [ppm] = 152.0 (C-11), 149.5 (C-14), 139.6 (C-15), 133.6 (C-10), 110.2 (C-13), 109.2 (C-12), 69.8 (C-18), 59.5 (C-1), 56.2 (C-17), 55.8 (C-16), 52.2 (C-2), 47.5 (C-6), 42.7 (C-19), 37.2 (C-9), 35.8 (C-21), 35.3 (C-3), 33.5 (C-4), 31.2 (C-22), 24.6 (C-5), 19.1 (C-20), 18.0 (C-8), 13.6 (C-7).

FT-IR (ATR):  $\tilde{\nu}$  [ $\text{cm}^{-1}$ ] = 3462 (br), 2930 (s), 2873 (w), 2848 (w), 1588 (w), 1490 (s), 1462 (m), 1385 (w), 1374 (w), 1359 (w), 1317 (w), 1298 (w), 1266 (w), 1253 (s), 1190 (w), 1171 (w), 1162 (w), 1149 (w), 1077 (m), 1047 (m), 997 (w), 962 (m), 923 (w), 898 (w), 863 (w), 789 (m), 726 (m), 665 (w), 647 (w), 580 (w), 537 (w).

GC-MS (70 eV):  $m/z$  (%) = 344 (21,  $[\text{M}]^+$ ), 326 (11), 269 (19), 259 (100), 243 (8), 203 (22), 189 (16), 71 (9), 55 (13).

HRMS (ESI):

Calc. [amu]

Found [amu]

367.22437  $[\text{M}+\text{Na}]^+$

367.22418  $[\text{M}+\text{Na}]^+$

$[\alpha]^{20}_\lambda$  (c = 0.40 g/100 mL,  $\text{CHCl}_3$ ):  $-72^\circ$  (436 nm),  $-42^\circ$  (546 nm),  $-36^\circ$  (579 nm),  $-35^\circ$  (589 nm).

X-ray crystal structure (CCDC 2077910):

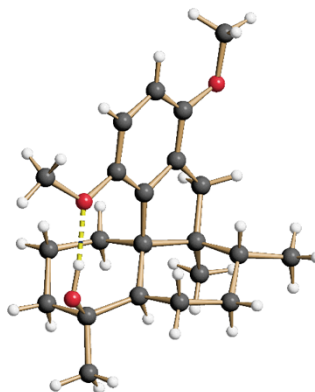

3.13. Synthesis of olefin **29**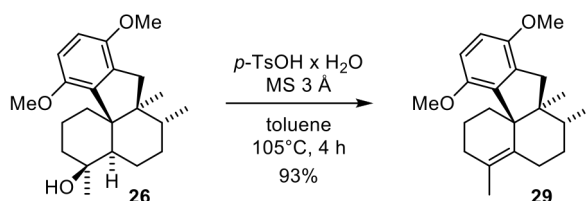

A *Schlenk* flask was charged with 2.2 g of freshly activated MS 3 Å powder before a solution of 504 mg (1.46 mmol, 1.00 eq.) of alcohol **26** in 42 mL of toluene (HPLC grade) and 2.93 g (15.4 mmol, 10.5 eq.) of  $p\text{-TsOH} \times \text{H}_2\text{O}$  were added. Then, the mixture was stirred at 105°C for 4 h. After cooling to rt and addition of sat. aqueous  $\text{NaHCO}_3$  the phases were separated and the aqueous phase was extracted twice with EtOAc. The combined organic phases were washed with  $\text{H}_2\text{O}$ , dried over  $\text{MgSO}_4$  and the solvent was removed under reduced pressure. The crude product was purified by silica gel column chromatography (*c*-Hex/EtOAc 50:1) to afford 442 mg (1.35 mmol, 93%) of olefin **29** as a colorless, crystalline solid.

**C<sub>22</sub>H<sub>30</sub>O<sub>2</sub>** (**M** = 326.48 g/mol)

**R<sub>f</sub>** (*c*-Hex/EtOAc 49:1) = 0.39

**m.p.**: 80 °C

**<sup>1</sup>H NMR** (500 MHz,  $\text{CDCl}_3$ , 298 K):  $\delta$  [ppm] = 6.61 (s, 2H, 12-H, 13-H), 3.77 (s, 3H, 16-H), 3.64 (s, 3H, 17-H), 2.80 (d,  $J$  = 15.8 Hz, 1H, 9-H<sub>a</sub>), 2.61 (dt,  $J$  = 13.8, 3.3 Hz, 1H, 5-H<sub>a</sub>), 2.52 (d,  $J$  = 15.8 Hz, 1H, 9-H<sub>b</sub>), 2.08 – 1.99 (m, 1H, 19-H<sub>a</sub>), 1.99 – 1.92 (m, 1H, 19-H<sub>b</sub>), 1.88 (ddd,  $J$  = 13.0, 10.1, 3.1 Hz, 1H, 21-H<sub>a</sub>), 1.71 (s, 3H, 22-H), 1.65 – 1.59 (m, 1H, 5-H<sub>b</sub>), 1.59 – 1.56 (m, 1H, 20-H<sub>a</sub>), 1.55 – 1.47 (m, 1H, 20-H<sub>b</sub>), 1.47 – 1.39 (m, 2H, 3-H, 21-H<sub>b</sub>), 1.33 (dq,  $J$  = 12.8, 3.5 Hz, 1H, 4-H<sub>a</sub>), 1.10 (dtd,  $J$  = 13.9, 12.6, 3.4 Hz, 1H, 4-H<sub>b</sub>), 0.96 (s, 3H, 7-H), 0.82 (d,  $J$  = 6.8 Hz, 3H, 8-H).

**<sup>13</sup>C NMR** (126 MHz,  $\text{CDCl}_3$ , 298 K):  $\delta$  [ppm] = 151.7 (C-14), 150.9 (C-11), 142.0 (C-15), 131.7 (C-10), 130.0 (C-6), 126.8 (C-18), 110.4 (C-13), 108.7 (C-12), 56.3 (C-17), 56.1 (C-1), 55.8 (C-16), 52.1 (C-2), 38.5 (C-9), 36.4 (C-3), 33.1 (C-19), 32.9 (C-21), 31.5 (C-4), 27.9 (C-5), 20.3 (C-20), 20.2 (C-22), 18.2 (C-8), 14.3 (C-7).

**FT-IR (ATR)**:  $\tilde{\nu}$  [ $\text{cm}^{-1}$ ] = 2951 (w), 2931 (m), 2908 (m), 2871 (w), 2852 (m), 2829 (m), 2044 (w), 1973 (w), 1595 (w), 1492 (s), 1463 (m), 1437 (m), 1379 (w), 1325 (w), 1255 (s), 1194 (w), 1172 (w), 1157 (w), 1142 (w), 1125 (w), 1094 (m), 1074 (m), 1057 (m), 1011 (w), 971 (w), 945 (w), 897 (w), 866 (w), 789 (m), 715 (m), 665 (w).

**GC-MS** (70 eV):  $m/z$  (%) = 326 (100,  $[\text{M}]^+$ ), 311 (69), 267 (19), 258 (24), 241 (27), 227 (11), 225 (11), 211 (13), 175 (15), 165 (11), 152 (10), 115 (11), 91 (11), 71 (13), 55 (15).

**HRMS** (ESI):

| Calc. [amu]                        | Found [amu]                        |
|------------------------------------|------------------------------------|
| 327.23186 $[\text{M}+\text{H}]^+$  | 327.23177 $[\text{M}+\text{H}]^+$  |
| 349.21380 $[\text{M}+\text{Na}]^+$ | 349.21378 $[\text{M}+\text{Na}]^+$ |

$[\alpha]^{20}_D$  ( $c$  = 0.49 g/100 mL,  $\text{CHCl}_3$ ): + 338° (436 nm), + 180° (546 nm), + 156° (579 nm), + 149° (589 nm).

**X-ray crystal structure** (CCDC 2077904):

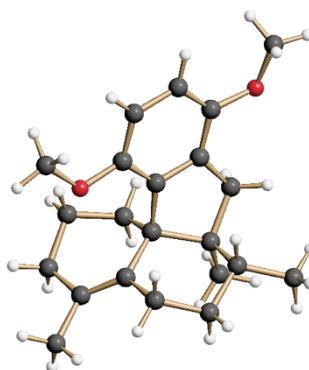

## 3.14. Synthesis of cyclopropane 30

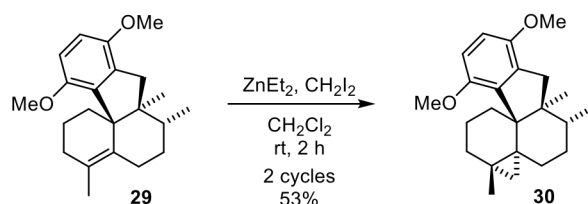

In a flame-dried *Schlenk* flask 105 mg (0.322 mmol, 1.00 eq.) of olefin **29** were dissolved in 750  $\mu\text{L}$  of  $\text{CH}_2\text{Cl}_2$  (HPLC grade). Then, 430  $\mu\text{L}$  (0.387 mmol, 1.20 eq.) of  $\text{ZnEt}_2$  (0.9 M in hexane) and 32.0  $\mu\text{L}$  (106 mg, 0.396 mmol, 1.23 eq.) of  $\text{CH}_2\text{I}_2$  were simultaneously added at rt and the addition procedure (same amounts) was repeated 3 more times with an interval of 20 minutes. The mixture was stirred for further 60 min at rt before excess reagent was quenched by addition of  $\text{H}_2\text{O}$  and sat. aqueous  $\text{NaHCO}_3$ . After extraction with  $\text{EtOAc}$  (2x) and  $\text{CH}_2\text{Cl}_2$  the combined organic phases were dried over  $\text{MgSO}_4$  and the solvent was removed under reduced pressure. The residue was purified by silica gel column chromatography (*c*-Hex/toluene 8:1  $\rightarrow$  4:1) to provide 48 mg (0.14 mmol, 44%) of cyclopropane **30** besides 40 mg (0.12 mmol, 38%) of reisolated olefin **29** which again subjected to the same cyclopropanation procedure. After the two cycles, 58 mg (0.17 mmol, 53%) of cyclopropane **30** were obtained as a colorless sticky oil, which solidified very slowly at rt.

$\text{C}_{23}\text{H}_{32}\text{O}_2$  ( $M = 340.51$  g/mol)

$R_f$  (*c*-Hex/toluene 1:1) = 0.62

m.p.: 76  $^\circ\text{C}$  – 80  $^\circ\text{C}$

$^1\text{H NMR}$  (500 MHz,  $\text{CDCl}_3$ , 298 K):  $\delta$  [ppm] = 6.66 (d,  $J = 8.9$  Hz, 1H, 13-H), 6.64 (d,  $J = 8.8$  Hz, 1H, 12-H), 3.78 (s, 3H, 17-H), 3.77 (s, 3H, 16-H), 2.70 (d,  $J = 15.7$  Hz, 1H, 9-H<sub>a</sub>), 2.46 (d,  $J = 15.7$  Hz, 1H, 9-H<sub>b</sub>), 1.73 (ddd,  $J = 13.9, 11.1, 8.6$  Hz, 1H, 19-H<sub>a</sub>), 1.62 (dd,  $J = 13.8, 8.7$  Hz, 1H, 19-H<sub>b</sub>), 1.58 – 1.47 (m, 2H, 5-H<sub>a</sub>, 21-H<sub>a</sub>), 1.41 – 1.23 (m, 4H, 3-H, 4-H<sub>a</sub>, 5-H<sub>b</sub>, 20-H<sub>a</sub>), 1.20 (ddd,  $J = 9.8, 4.6, 3.5$  Hz, 1H, 20-H<sub>b</sub>), 1.14 (s, 3H, 22-H), 1.13 – 1.06 (m, 2H, 4-H<sub>b</sub>, 21-H<sub>b</sub>), 1.01 (s, 3H, 7-H), 0.81 (d,  $J = 6.2$  Hz, 3H, 8-H), 0.72 (dd,  $J = 4.3, 1.7$  Hz, 1H, 23-H<sub>a</sub>), –0.01 (d,  $J = 4.4$  Hz, 1H, 23-H<sub>b</sub>).

$^{13}\text{C NMR}$  (126 MHz,  $\text{CDCl}_3$ , 298 K):  $\delta$  [ppm] = 152.4 (C-14), 151.1 (C-11), 139.7 (C-15), 132.3 (C-10), 108.8 (C-12), 108.7 (C-13), 55.7 (C-17), 55.6 (C-16), 55.0 (C-1), 51.0 (C-2), 38.5 (C-9), 36.1 (C-3), 31.4 (C-19), 30.5 (C-5), 30.3 (C-4), 28.5 (C-6), 28.1 (C-21), 23.6 (C-23), 23.4 (C-22), 20.7 (C-18), 18.6 (C-20), 18.2 (C-8), 14.0 (C-7).

**FT-IR (ATR)**:  $\tilde{\nu}$  [ $\text{cm}^{-1}$ ] = 3676 (br), 3053 (w), 2946 (w), 2928 (s), 2904 (w), 2849 (w), 2830 (w), 1594 (w), 1492 (s), 1462 (m), 1438 (w), 1407 (w), 1395 (w), 1380 (w), 1322 (w), 1255 (s), 1175 (w), 1147 (w), 1085 (m), 1062 (m), 978 (w), 893 (br), 808 (w), 788 (w), 716 (w), 649 (w).

**GC-MS** (70 eV):  $m/z$  (%) = 340 (100,  $[\text{M}]^+$ ), 272 (26), 258 (40), 257 (51), 255 (37), 243 (27), 215 (31), 201 (29), 189 (38), 55 (30).

$[\alpha]^{20}_\lambda$  ( $c = 1.00$  g/100 mL,  $\text{CHCl}_3$ ): + 132 $^\circ$  (436 nm), + 73 $^\circ$  (546 nm), + 63 $^\circ$  (579 nm), + 60 $^\circ$  (589 nm).

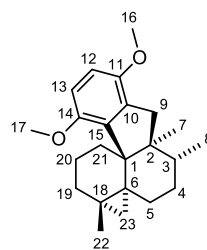

## 3.15. Synthesis of (–)-dysiherbol A (31)

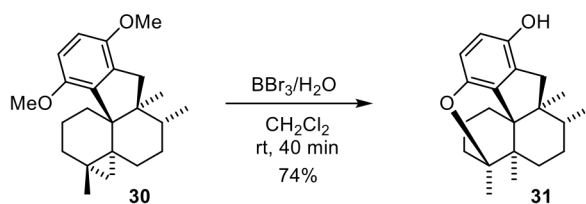

To solution of 43 mg (0.13 mmol, 1.0 eq.) of cyclopropane **30** in 1.6 mL of CH<sub>2</sub>Cl<sub>2</sub> were added 23 μL (23 mg, 1.3 mmol, 10 eq.) of H<sub>2</sub>O and 1.6 mL (1.3 mmol, 10 eq.) of BBr<sub>3</sub> (0.78 M in heptane) and the mixture was stirred at rt for 40 min. After addition of H<sub>2</sub>O the aqueous phase was extracted three times with CH<sub>2</sub>Cl<sub>2</sub>. The combined organic phases were dried over MgSO<sub>4</sub> and the solvent was removed under reduced pressure. The crude product was purified by silica gel column chromatography (*c*-Hex/EtOAc 20:1) to provide 29 mg (0.092 mmol, 74%) of (–)-dysiherbol A (**31**) as a yellow, sticky oil. Slow evaporation of an Et<sub>2</sub>O/MeOH solution of **31** at rt delivered crystalline (–)-dysiherbol A (as MeOH complex) as a yellowish, crystalline solid.

**C**<sub>21</sub>**H**<sub>28</sub>**O**<sub>2</sub> (**M** = 312.45 g/mol)

**R**<sub>f</sub> (*c*-Hex/EtOAc 9:1) = 0.31

**m.p.**: 97 °C – 100 °C

**<sup>1</sup>H NMR** (500 MHz, CDCl<sub>3</sub>, 298 K): δ [ppm] = 6.49 (d, *J* = 8.5 Hz, 1H, 18-H), 6.43 (d, *J* = 8.5 Hz, 1H, 19-H), 4.20 (br, 1H, OH), 2.57 (d, *J* = 15.2 Hz, 1H, 15-H<sub>a</sub>), 2.54 (d, *J* = 15.0 Hz, 1H, 15-H<sub>b</sub>), 1.96 (td, *J* = 14.1, 6.5 Hz, 1H, 3-H<sub>a</sub>), 1.85 (td, *J* = 12.7, 4.4 Hz, 1H, 1-H<sub>a</sub>), 1.68 (dd, *J* = 14.6, 5.8 Hz, 1H, 3-H<sub>b</sub>), 1.54 – 1.47 (m, 1H, 2-H<sub>a</sub>), 1.41 – 1.37 (m, 1H, 6-H<sub>a</sub>), 1.37 – 1.27 (m, 4H, 1-H<sub>b</sub>, 2-H<sub>b</sub>, 6-H<sub>b</sub>, 7-H<sub>a</sub>), 1.25 – 1.17 (m, 2H, 7-H<sub>b</sub>, 8-H), 1.22 (s, 3H, 11-H), 1.21 (s, 3H, 12-H), 1.08 (s, 3H, 14-H), 0.83 (d, *J* = 6.6 Hz, 3H, 13-H).

**<sup>13</sup>C NMR** (126 MHz, CDCl<sub>3</sub>, 298 K): δ [ppm] = 148.5 (C-20), 145.7 (C-17), 133.2 (C-21), 126.0 (C-16), 114.4 (C-18), 111.2 (C-19), 82.6 (C-4), 52.0 (C-9), 49.3 (C-10), 39.5 (C-15), 37.4 (C-5), 35.8 (C-3), 35.6 (C-8), 30.1 (C-6), 26.6 (C-7), 26.5 (C-1), 22.1 (C-11), 19.9 (C-2), 18.6 (C-12), 17.9 (C-13), 15.0 (C-14).

**FT-IR (ATR)**:  $\tilde{\nu}$  [cm<sup>-1</sup>] = 3389 (br), 2929 (s), 2870 (m), 2856 (m), 1710 (br), 1633 (w), 1489 (s), 1461 (s), 1382 (m), 1349 (w), 1324 (w), 1312 (w), 1263 (s), 1196 (m), 1183 (s), 1164 (m), 1131 (w), 1106 (s), 1087 (w), 1061 (w), 1045 (w), 1027 (w), 1010 (w), 988 (w), 959 (s), 937 (w), 911 (w), 887 (w), 869 (s), 800 (s), 763 (w), 738 (m), 704 (w), 594 (w).

**GC-MS** (70 eV): *m/z* (%) = 312 (100, [M]<sup>+</sup>), 243 (9), 225 (9), 213 (8), 199 (8), 187 (10), 173 (33), 161 (8), 119 (15), 115 (8), 55 (14).

**[α]<sup>20</sup><sub>D</sub>** (*c* = 0.50 g/100 mL, MeOH): – 27° (546 nm), – 24° (579 nm), – 23° (589 nm).

**X-ray crystal structure** (CCDC 2077913):

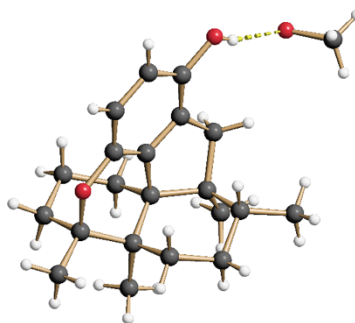

3.16. Synthesis of quinone **SI5**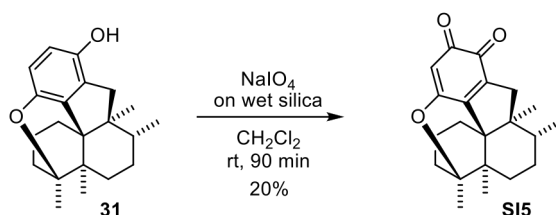

According to a procedure of Baran,<sup>[11]</sup> a solution of 10 mg (0.032 mmol, 1.0 eq.) of (–)-dysiherbol A (**31**) in 1.1 mL of dry CH<sub>2</sub>Cl<sub>2</sub> was cooled to 0°C before 0.13 g (0.083 mmol, 2.6 eq.) of NaIO<sub>4</sub> on wet silica gel were added (preparation:<sup>[12]</sup> A solution of 2.59 g (12.1 mmol) of NaIO<sub>4</sub> in 6.0 mL of H<sub>2</sub>O was heated to 70°C to give an almost clear solution. To the hot solution were added 10 g of silica gel and the mixture was shaken vigorously until a homogenous, free-flowing powder (0.65 mmol NaIO<sub>4</sub>/g) was obtained). The stirred reaction mixture was allowed to warm to rt and stirred for 90 min. The red suspension was filtered and the solvent was removed under reduced pressure. The residue was purified by silica gel column chromatography (c-Hex/EtOAc 5:1) to provide 2.1 mg (20%) of quinone **SI5** as a dark red, viscous oil.

**C**<sub>21</sub>**H**<sub>26</sub>**O**<sub>3</sub> (**M** = 326.44 g/mol)

**R**<sub>f</sub> (c-Hex/EtOAc 4:1) = 0.23

**<sup>1</sup>H NMR** (500 MHz, CDCl<sub>3</sub>, 298 K): δ [ppm] = 5.61 (s, 1H, 13-H), 2.50 (d, *J* = 17.0 Hz, 1H, 9-H<sub>a</sub>), 2.37 (d, *J* = 16.8 Hz, 1H, 9-H<sub>b</sub>), 2.04 (ddd, *J* = 14.9, 13.2, 6.3 Hz, 1H, 17-H<sub>a</sub>), 1.92 – 1.83 (m, 1H, 19-H<sub>a</sub>), 1.79 – 1.70 (m, 2H, 17-H<sub>b</sub>, 18-H<sub>a</sub>), 1.64 – 1.50 (m, 3H, 5-H<sub>a</sub>, 18-H<sub>b</sub>, 19-H<sub>b</sub>), 1.45 – 1.32 (m, 4H, 3-H, 4-H, 5-H<sub>b</sub>), 1.30 (s, 3H, 20-H), 1.19 (s, 3H, 21-H), 1.05 (s, 3H, 7-H), 0.87 (d, *J* = 6.5 Hz, 3H, 8-H).

**<sup>13</sup>C NMR** (126 MHz, CDCl<sub>3</sub>, 298 K): δ [ppm] = 181.3 (C-11), 178.7 (C-12), 166.1 (C-14), 156.3 (C-15), 138.2 (C-10), 102.8 (C-13), 88.0 (C-16), 52.2 (C-1), 50.8 (C-2), 39.6 (C-9), 39.5 (C-6), 36.3 (C-3), 33.9 (C-17), 30.5 (C-5), 27.1 (C-19), 25.8 (C-4), 21.7 (C-20), 19.5 (C-18), 18.8 (C-21), 17.7 (C-8), 15.0 (C-7).

**FT-IR (ATR):**  $\tilde{\nu}$  [cm<sup>-1</sup>] = 2952 (w), 2926 (s), 2872 (m), 2856 (m), 1723 (w), 1677 (m), 1646 (s), 1578 (s), 1458 (m), 1395 (s), 1351 (w), 1293 (w), 1262 (w), 1235 (m), 1196 (w), 1178 (m), 1129 (w), 1102 (w), 1078 (w), 1041 (w), 1028 (w), 1015 (w), 965 (w), 920 (w), 912 (w), 856 (w), 836 (w), 798 (w), 777 (w), 731 (w), 680 (w).

**HRMS (ESI):**

Calc. [amu]

Found [amu]

327.19547 [M+H]<sup>+</sup>

327.19532 [M+H]<sup>+</sup>

349.17742 [M+Na]<sup>+</sup>

349.17730 [M+Na]<sup>+</sup>

**[α]<sup>20</sup><sub>D</sub>** (c = 0.02 g/100 mL, MeOH): + 125° (579 nm), + 107° (589 nm).

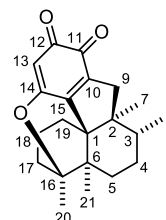

3.17. Synthesis of triol **27**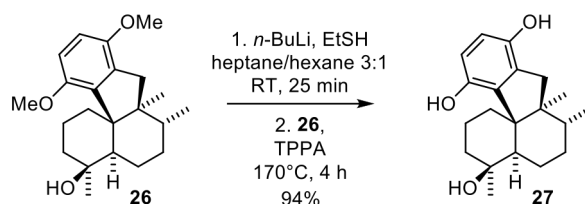

In a *Schlenk* flask, 0.40 mL (0.88 mmol, 10 eq.) of *n*-BuLi (2.2 M in hexane) were diluted with 1.2 mL of heptane and the solution was cooled to 0 °C before 77  $\mu$ L (65 mg, 1.0 mmol, 12 eq.) of EtSH were added.<sup>[13]</sup> The resulting suspension was stirred for 5 min at 0 °C and for 25 min at rt. Then, the solvents were removed *in vacuo* and the residual colorless solid was dried for 45 min before 0.45 mL of TPPA and 30 mg (0.087 mmol, 1.0 eq.) of alcohol **26** were added and the stirred mixture was heated to 170 °C for 4 h under argon. After cooling to 25 °C, 3 mL of sat. aqueous NH<sub>4</sub>Cl and 35 mL of H<sub>2</sub>O were added and the aqueous phase was extracted with 3 x 25 mL of MTBE. The combined organic layers were washed with 80 mL of H<sub>2</sub>O, dried over Na<sub>2</sub>SO<sub>4</sub> and the solvent was removed under reduced pressure. Purification of the crude product by silica gel column chromatography (*c*-Hex/EtOAc 4:1) afforded 26 mg (0.082 mmol, 94%) of triol **27** as a colorless solid. Slow evaporation of an Et<sub>2</sub>O solution of **27** at rt delivered the triol (as Et<sub>2</sub>O complex) as a colorless, crystalline solid.

**C**<sub>20</sub>**H**<sub>28</sub>**O**<sub>3</sub> (**M** = 316.44 g/mol)

**R**<sub>f</sub> (*c*-Hex/EtOAc 2:1) = 0.44

**m.p.**: 116 °C – 118 °C

**<sup>1</sup>H NMR** (500 MHz, CDCl<sub>3</sub>, 298 K):  $\delta$  [ppm] = 6.58 (d, *J* = 8.6 Hz, 1H, 18-H), 6.54 (d, *J* = 8.6 Hz, 1H, 19-H), 4.51 (br, 1H, OH), 2.66 (d, *J* = 15.3 Hz, 1H, 15-H<sub>a</sub>), 2.42 (d, *J* = 15.3 Hz, 1H, 15-H<sub>b</sub>), 1.92 – 1.87 (m, 1H, 3-H<sub>a</sub>), 1.87 – 1.82 (m, 1H, 6-H<sub>a</sub>), 1.64 – 1.50 (m, 5H, 1-H<sub>a</sub>, 2-H<sub>a</sub>, 3-H<sub>b</sub>, 5-H, 7-H<sub>a</sub>), 1.50 – 1.46 (m, 1H, 1-H<sub>b</sub>), 1.46 – 1.40 (m, 2H, 2-H<sub>b</sub>, 8-H), 1.39 (s, 3H, 11-H), 1.33 (td, *J* = 12.6, 3.3 Hz, 1H, 6-H<sub>b</sub>), 1.19 (qd, *J* = 12.8, 3.9 Hz, 1H, 7-H<sub>b</sub>), 0.99 (s, 3H, 14-H), 0.76 (d, *J* = 6.7 Hz, 3H, 13-H).

**<sup>13</sup>C NMR** (126 MHz, CDCl<sub>3</sub>, 298 K):  $\delta$  [ppm] = 148.2 (C-20), 145.6 (C-17), 134.9 (C-21), 129.4 (C-16), 116.5 (C-19), 115.0 (C-18), 72.7 (C-4), 58.1 (C-10), 52.0 (C-9), 46.9 (C-5), 41.6 (C-3), 36.8 (C-15), 35.6 (C-1), 34.9 (C-8), 33.1 (C-7), 31.5 (C-11), 24.2 (C-6), 19.0 (C-2), 17.9 (C-13), 13.5 (C-14).

**FT-IR (ATR)**:  $\tilde{\nu}$  [cm<sup>-1</sup>] = 3319 (br), 2930 (s), 2874 (m), 2853 (m), 2678 (br), 2248 (br), 1701 (br), 1648 (w), 1619 (w), 1592 (w), 1485 (w), 1461 (s), 1376 (m), 1329 (w), 1301 (w), 1262 (m), 1230 (s), 1185 (m), 1167 (m), 1125 (w), 1087 (w), 1053 (w), 1022 (m), 996 (w), 957 (w), 907 (s), 871 (m), 826 (w), 804 (m), 785 (w), 758 (w), 731 (s), 648 (w), 591 (w), 531 (w), 512 (w).

**GC-MS** (70 eV): *m/z* (%) = 316 (4, [M]<sup>+</sup>), 298 (100), 283 (18), 255 (82), 239 (10), 213 (13), 173 (15), 161 (9), 115 (8), 55 (11).

**HRMS** (ESI):

Calc. [amu]

Found [amu]

339.19307 [M+Na]<sup>+</sup>

339.19383 [M+Na]<sup>+</sup>

**[ $\alpha$ ]<sup>20</sup><sub>D</sub>** (*c* = 1.00 g/100 mL, MeOH): – 24° (546 nm), – 22° (579 nm), – 22° (589 nm).

**X-ray crystal structure** (CCDC 2082956):

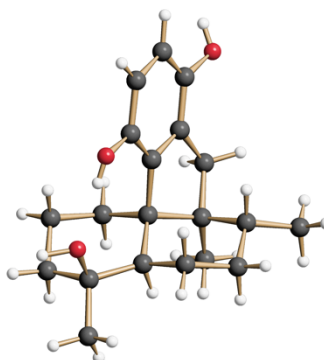

3.18. Synthesis of nor-(–)-dysiherbol A (**28**)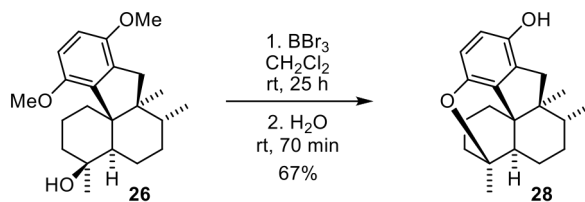

A solution of 26 mg (0.075 mmol, 1.0 eq.) of alcohol **26** in 1.0 mL of dry  $\text{CH}_2\text{Cl}_2$  was cooled to  $0^\circ\text{C}$  before 0.29 mL (0.29 mmol, 3.9 eq.) of  $\text{BBr}_3$  (1.0 M in  $\text{CH}_2\text{Cl}_2$ ) were added over 1 min. The solution was then stirred for 5 min at  $0^\circ\text{C}$  and for 25 h at rt before, 3 drops of  $\text{H}_2\text{O}$  were added causing discoloration. The suspension was stirred for further 70 min at rt, before it was hydrolyzed by addition 3 mL of sat. aqueous  $\text{NaHCO}_3$  and 15 mL of  $\text{H}_2\text{O}$ . The aqueous phase was extracted with 3 x 15 mL of MTBE, the combined organic phases were dried over  $\text{Na}_2\text{SO}_4$  and the solvent was removed under reduced pressure. The crude product was purified by silica gel column chromatography (*c*-Hex/EtOAc 10:1) to provide 15 mg (0.050 mmol, 67%) of **28** as a colorless solid.

$\text{C}_{20}\text{H}_{26}\text{O}_2$  ( $M = 298.43$  g/mol)

$R_f$  (*c*-Hex/EtOAc 3:1) = 0.66

$m.p.$ :  $67^\circ\text{C} - 69^\circ\text{C}$

$^1\text{H NMR}$  (500 MHz,  $\text{CDCl}_3$ , 298 K):  $\delta$  [ppm] = 6.50 (d,  $J = 8.5$  Hz, 1H, 18-H), 6.45 (d,  $J = 8.5$  Hz, 1H, 19-H), 4.24 (s, 1H, OH), 2.64 (d,  $J = 15.1$  Hz, 1H, 15- $\text{H}_a$ ), 2.59 (d,  $J = 15.0$  Hz, 1H, 15- $\text{H}_b$ ), 1.95 – 1.89 (m, 1H, 3- $\text{H}_a$ ), 1.69 – 1.62 (m, 2H, 6- $\text{H}_a$ , 1- $\text{H}_a$ ), 1.59 (dd,  $J = 12.4, 5.1$  Hz, 1H, 5-H), 1.56 – 1.46 (m, 2H, 3- $\text{H}_b$ , 2- $\text{H}_a$ ), 1.43 (dd,  $J = 12.4, 3.6$  Hz, 1H, 1- $\text{H}_b$ ), 1.39 – 1.33 (m, 1H, 2- $\text{H}_b$ ), 1.31 (s, 3H, 11-H), 1.30 – 1.28 (m, 1H, 7- $\text{H}_a$ ), 1.16 – 1.10 (m, 1H, 8-H), 1.08 (dd,  $J = 12.6, 2.7$  Hz, 1H, 7- $\text{H}_b$ ), 1.03 (s, 3H, 14-H), 0.91 – 0.84 (m, 1H, 6- $\text{H}_b$ ), 0.82 (d,  $J = 6.5$  Hz, 3H, 13-H).

$^{13}\text{C NMR}$  (126 MHz,  $\text{CDCl}_3$ , 298 K):  $\delta$  [ppm] = 148.9 (C-20), 145.6 (C-17), 131.1 (C-21), 126.5 (C-16), 114.5 (C-18), 111.4 (C-19), 79.2 (C-4), 51.8 (C-9), 47.8 (C-10), 42.7 (C-5), 41.3 (C-3), 38.8 (C-15), 35.7 (C-8), 33.5 (C-1), 29.4 (C-7), 26.0 (C-11), 23.3 (C-6), 20.5 (C-2), 18.0 (C-13), 13.1 (C-14).

**FT-IR (ATR)**:  $\tilde{\nu}$  [ $\text{cm}^{-1}$ ] = 3370 (br), 2928 (s), 2872 (w), 2849 (w), 2246 (w), 1630 (w), 1486 (s), 1462 (s), 1377 (m), 1351 (w), 1332 (w), 1308 (w), 1277 (m), 1263 (w), 1242 (s), 1213 (m), 1189 (s), 1175 (w), 1148 (w), 1137 (w), 1114 (m), 1074 (w), 1036 (w), 1023 (w), 1013 (w), 994 (w), 956 (m), 942 (m), 910 (m), 895 (w), 880 (w), 871 (m), 797 (s), 762 (w), 733 (s), 648 (w), 593 (w).

**GC-MS** (70 eV):  $m/z$  (%) = 298 (100,  $[\text{M}]^+$ ), 283 (15), 255 (74), 239 (11), 213 (12), 173 (11), 161 (7), 115 (8), 91 (7), 55 (9).

**HRMS** (ESI):

| Calc. [amu]                       | Found [amu]                       |
|-----------------------------------|-----------------------------------|
| 299.20056 $[\text{M}+\text{H}]^+$ | 299.20111 $[\text{M}+\text{H}]^+$ |

$[\alpha]_D^{20}$  ( $c = 0.68$  g/100 mL,  $\text{CHCl}_3$ ):  $-66^\circ$  (436 nm),  $-40^\circ$  (546 nm),  $-35^\circ$  (579 nm),  $-33^\circ$  (589 nm).

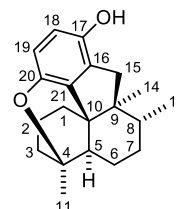



## 3.19. Synthesis of olefin 33

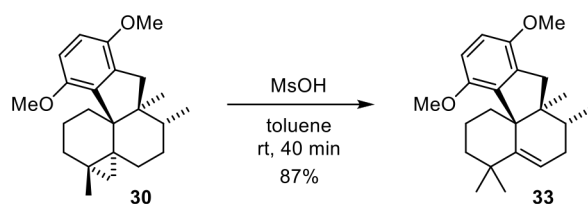

To a solution of 15 mg (0.044 mmol, 1.0 eq.) of cyclopropane **30** in 1.1 mL toluene were added 5.7  $\mu$ L (8.5 mg, 0.088 mmol, 2.0 eq.) of MsOH and the mixture was stirred for 40 min at rt. After addition of 3 mL of sat. aqueous NaHCO<sub>3</sub> and 30 mL of H<sub>2</sub>O the aqueous phase was extracted with 3 x 20 mL of MTBE. The combined organic phases were dried over Na<sub>2</sub>SO<sub>4</sub> and the solvent was removed under reduced pressure. The crude product was purified by silica gel column chromatography (c-Hex/toluene 2:1) to give 13 mg (0.038 mmol, 87%) of olefin **33** as a colorless, crystalline solid.

**C<sub>23</sub>H<sub>32</sub>O<sub>2</sub>** (**M** = 340.51 g/mol)

**R<sub>f</sub>** (toluene) = 0.63

**m.p.:** 166 °C – 168 °C

**<sup>1</sup>H NMR** (500 MHz, CDCl<sub>3</sub>, 298 K):  $\delta$  [ppm] = 6.61 (s, 2H, 12-H, 13-H), 5.68 (t,  $J$  = 3.6 Hz, 1H, 5-H), 3.77 (s, 3H, 16-H), 3.68 (s, 3H, 17-H), 2.83 (d,  $J$  = 16.0 Hz, 1H, 9-H<sub>a</sub>), 2.59 (d,  $J$  = 16.0 Hz, 1H, 9-H<sub>b</sub>), 2.16 (ddd,  $J$  = 13.3, 12.0, 6.1 Hz, 1H, 19-H<sub>a</sub>), 2.03 (dt,  $J$  = 17.7, 4.8 Hz, 1H, 4-H<sub>a</sub>), 1.83 (td,  $J$  = 13.3, 6.7 Hz, 1H, 21-H<sub>a</sub>), 1.70 – 1.56 (m, 3H, 3-H, 4-H<sub>b</sub>, 20-H<sub>a</sub>), 1.48 (ddd,  $J$  = 13.1, 6.4, 2.0 Hz, 1H, 21-H<sub>b</sub>), 1.37 – 1.30 (m, 1H, 20-H<sub>b</sub>), 1.30 – 1.24 (m, 1H, 19-H<sub>b</sub>), 1.21 (s, 3H, 22-H), 1.18 (s, 3H, 23-H), 0.87 (s, 3H, 7-H), 0.79 (d,  $J$  = 6.5 Hz, 3H, 8-H).

**<sup>13</sup>C NMR** (126 MHz, CDCl<sub>3</sub>, 298 K):  $\delta$  [ppm] = 151.9 (C-14), 151.2 (C-11), 145.5 (C-6), 142.5 (C-15), 131.2 (C-10), 120.8 (C-5), 109.6 (C-13), 108.8 (C-12), 55.8 (C-16), 55.63 (C-1), 55.56 (C-17), 50.1 (C-2), 38.3 (C-23), 36.6 (C-9), 34.8 (C-18), 32.9 (C-4), 32.5 (C-19), 31.8 (C-22), 30.4 (C-3), 27.2 (C-21), 17.0 (C-8), 16.8 (C-20), 12.3 (C-7).

**FT-IR (ATR):**  $\tilde{\nu}$  [cm<sup>-1</sup>] = 3676 (br), 3001 (w), 2954 (s), 2913 (w), 2899 (w), 2864 (w), 2835 (w), 1606 (w), 1492 (s), 1461 (m), 1441 (w), 1380 (w), 1357 (w), 1321 (w), 1279 (w), 1254 (s), 1178 (w), 1148 (w), 1114 (w), 1090 (m), 1075 (w), 1058 (m), 1042 (w), 1030 (w), 985 (w), 967 (w), 952 (w), 832 (w), 789 (m), 718 (w), 680 (w), 630 (w), 517 (w).

**GC-MS** (70 eV):  $m/z$  (%) = 340 (41, [M]<sup>+</sup>), 271 (100), 253 (18), 239 (32), 201 (97), 189 (24), 173 (15), 152 (67), 119 (66), 83 (16), 55 (20).

**HRMS** (ESI):

| Calc. [amu]                   | Found [amu]                   |
|-------------------------------|-------------------------------|
| 341.24751 [M+H] <sup>+</sup>  | 341.24765 [M+H] <sup>+</sup>  |
| 363.22945 [M+Na] <sup>+</sup> | 363.22941 [M+Na] <sup>+</sup> |

**[ $\alpha$ ]<sup>20</sup><sub>D</sub>** ( $c$  = 0.50 g/100 mL, CHCl<sub>3</sub>): + 106° (436 nm), + 57° (546 nm), + 49° (579 nm), + 47° (589 nm).

**X-ray crystal structure** (CCDC 2077909):

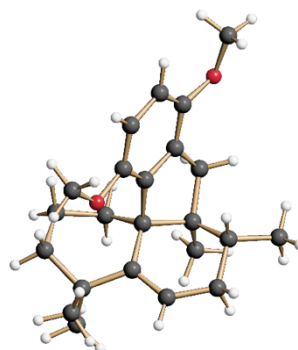

3.20. Synthesis of (–)-dysiherbol A methyl ether (**32**) from olefin **33**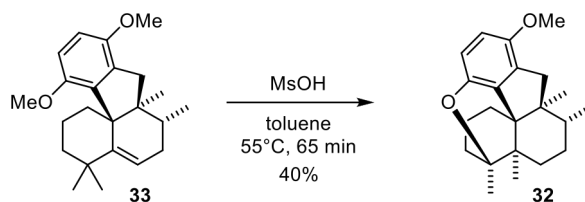

To a solution of 12 mg (0.035 mmol, 1.0 eq.) of olefin **33** in 0.90 mL dry toluene was added 46  $\mu\text{L}$  (68 mg, 0.70 mmol, 20 eq.) of MsOH and the mixture was stirred at 55 °C for 65 min under argon. After cooling to rt 3 mL of sat. aqueous  $\text{NaHCO}_3$  and 35 mL of  $\text{H}_2\text{O}$  the aqueous phase was extracted with 3 x 25 mL of MTBE, the combined organic phases were dried over  $\text{Na}_2\text{SO}_4$  and the solvent was removed under reduced pressure. The crude product was purified by silica gel column chromatography (c-Hex/toluene 1:1) to provide 4.6 mg (0.014 mmol, 40%) of **32** as a colorless viscous oil, which crystallized upon slowly evaporation of a pentane solution at rt to form needles.

**C<sub>22</sub>H<sub>30</sub>O<sub>2</sub>** (**M** = 326.48 g/mol)

**R<sub>f</sub>** (c-Hex/toluene 1:1) = 0.22

**m.p.:** 83 °C – 86 °C

**<sup>1</sup>H NMR** (500 MHz,  $\text{CDCl}_3$ , 298 K):  $\delta$  [ppm] = 6.56 (d,  $J$  = 8.6 Hz, 1H, 12-H), 6.48 (d,  $J$  = 8.6 Hz, 1H, 13-H), 3.75 (s, 3H, 16-H), 2.62 (d,  $J$  = 15.4 Hz, 1H, 9-H<sub>a</sub>), 2.57 (d,  $J$  = 15.4 Hz, 1H, 9-H<sub>b</sub>), 1.96 (td,  $J$  = 14.0, 6.5 Hz, 1H, 18-H<sub>a</sub>), 1.84 (td,  $J$  = 12.8, 4.6 Hz, 1H, 20-H<sub>a</sub>), 1.68 (dd,  $J$  = 14.5, 5.8 Hz, 1H, 18-H<sub>b</sub>), 1.53 – 1.46 (m, 1H, 19-H<sub>a</sub>), 1.42 – 1.35 (m, 2H, 5-H<sub>a</sub>, 20-H<sub>b</sub>), 1.35 – 1.28 (m, 3H, 4-H<sub>a</sub>, 5-H<sub>b</sub>, 19-H<sub>b</sub>), 1.24 – 1.17 (m, 2H, 3-H, 4-H<sub>b</sub>), 1.22 (s, 3H, 21-H), 1.21 (s, 3H, 22-H), 1.07 (s, 3H, 7-H), 0.83 (d,  $J$  = 6.7 Hz, 3H, 8-H).

**<sup>13</sup>C NMR** (126 MHz,  $\text{CDCl}_3$ , 298 K):  $\delta$  [ppm] = 150.2 (C-11), 148.7 (C-14), 133.6 (C-15), 128.2 (C-10), 110.4 (C-13), 110.3 (C-12), 82.6 (C-17), 56.1 (C-16), 51.6 (C-2), 49.2 (C-1), 40.1 (C-9), 37.4 (C-6), 35.9 (C-18), 35.7 (C-3), 30.1 (C-5), 26.60 (C-4), 26.57 (C-20), 22.1 (C-21), 19.9 (C-19), 18.7 (C-22), 18.0 (C-8), 15.0 (C-7).

**FT-IR (ATR):**  $\tilde{\nu}$  [ $\text{cm}^{-1}$ ] = 2933 (s), 2871 (w), 2832 (w), 1725 (w), 1623 (w), 1492 (s), 1457 (m), 1382 (w), 1348 (w), 1340 (w), 1325 (w), 1313 (w), 1297 (w), 1261 (s), 1229 (w), 1185 (w), 1164 (w), 1140 (w), 1126 (w), 1106 (m), 1068 (m), 1031 (w), 1011 (w), 966 (w), 925 (w), 911 (w), 888 (w), 862 (w), 794 (m), 758 (w), 720 (w), 658 (w), 632 (w), 587 (w), 505 (w).

**GC-MS** (70 eV):  $m/z$  (%) = 326 (100,  $[\text{M}]^+$ ), 257 (16), 201 (8), 187 (38), 175 (7), 119 (18), 115 (8), 91 (7), 83 (7), 69 (6), 55 (16).

**HRMS** (ESI):

Calc. [amu]

Found [amu]

349.21380  $[\text{M}+\text{Na}]^+$

349.21371  $[\text{M}+\text{Na}]^+$

**$[\alpha]^{20}_\lambda$**  ( $c$  = 0.50 g/100 mL,  $\text{CHCl}_3$ ): – 79° (436 nm), – 43° (546 nm), – 36° (579 nm), – 35° (589 nm).

**X-ray crystal structure** (CCDC 2077906):

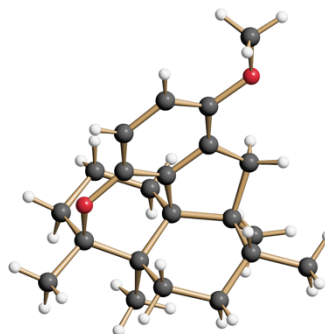

**3.21. Synthesis of (–)-dysiherbol A methyl ether (32) from cyclopropane 30**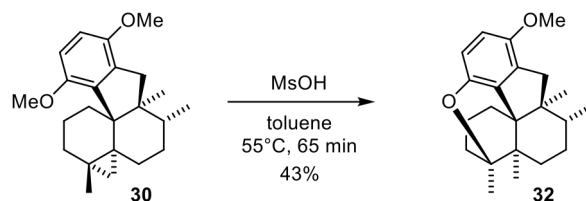

To a solution of 16 mg (0.047 mmol, 1.0 eq.) of cyclopropane **30** in 1.2 mL of dry toluene were added 61  $\mu$ L (90 mg, 0.94 mmol, 20 eq.) of MsOH and the mixture was stirred at 55 °C for 65 min. After cooling to rt, 3 mL of sat. aqueous NaHCO<sub>3</sub> and 25 mL of H<sub>2</sub>O were added and the aqueous phase was extracted with 3 x 20 mL of MTBE. The combined organic phases were dried over Na<sub>2</sub>SO<sub>4</sub> and the solvent was removed under reduced pressure. The crude product was purified by silica gel column chromatography (*c*-Hex/toluene 1:1) to provide 6.6 mg (0.020 mmol, 43%) of **32** as a pale yellow viscous oil, which crystallized upon slow evaporation of a pentane solution at rt to form needles.

The analytical data were identical to those given above (section **3.20**).

**3.22. Synthesis of (–)-dysiherbol A (31) from its methyl ether 32**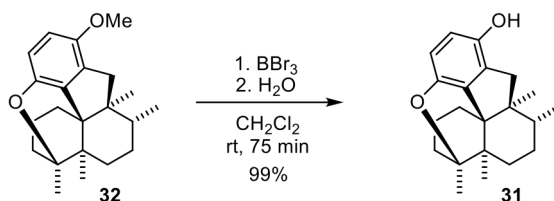

A solution of 15 mg (0.046 mmol, 1.0 eq.) of **32** in 0.6 mL of dry CH<sub>2</sub>Cl<sub>2</sub> was cooled to 0 °C before 0.13 mL (0.098 mmol, 2.1 eq.) of BBr<sub>3</sub> (0.78 M in heptane) were added via syringe over 20 s. After stirring the mixture for 75 min at rt, 0.10 mL of H<sub>2</sub>O were added and stirred was continued for 10 min at rt before excess reagent was hydrolyzed by addition of 3 mL of sat. aqueous NaHCO<sub>3</sub> and 20 mL of H<sub>2</sub>O. The aqueous phase was extracted with 3 x 20 mL of MTBE, the combined organic phases were dried over Na<sub>2</sub>SO<sub>4</sub> and the solvent was removed under reduced pressure. The crude product was purified by silica gel column chromatography (*c*-Hex/EtOAc 10:1) to provide 15 mg (0.046 mmol, 99%) of (–)-dysiherbol A (**31**) as a yellow, sticky oil.

The analytical data were identical to those given above (section **3.15**).

## 3.23. Synthesis of enol ether 18

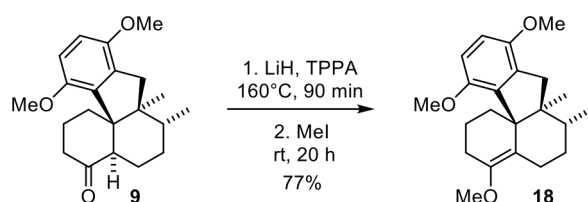

To a solution of 80 mg (0.24 mmol, 1.0 eq.) of ketone **9** in 1.1 mL of TPPA were added 43 mg (5.4 mmol, 22 eq.) of LiH and the stirred suspension was heated to 160°C for 90 min. Then, the mixture was cooled to 0° C and 0.30 mL (0.69 g, 4.9 mmol, 20 eq.) of Mel were added. The mixture was allowed to reach rt and stirred for another 20 h, before excess LiH was carefully quenched with 5 mL of 25% aqueous NH<sub>4</sub>OH. After addition of 45 mL of H<sub>2</sub>O and extraction with 3 x 20 mL of MTBE the combined organic phases were dried over Na<sub>2</sub>SO<sub>4</sub> and the solvent was removed under reduced pressure. The crude product was purified by silica gel column chromatography (*c*-Hex/EtOAc 20:1) to provide 64 mg (0.19 mmol, 77%) of enol ether **18** as a colorless, crystalline solid.

**C**<sub>22</sub>**H**<sub>30</sub>**O**<sub>3</sub> (**M** = 342.48 g/mol)

**R**<sub>f</sub> (*c*-Hex/EtOAc 9:1) = 0.64

**m.p.**: 78 °C – 80 °C

**<sup>1</sup>H NMR** (500 MHz, CDCl<sub>3</sub>, 298 K): δ [ppm] = 6.62 (s, 2H, 12-H, 13-H), 3.77 (s, 3H, 16-H), 3.67 (s, 3H, 17-H), 3.54 (s, 3H, 22-H), 2.90 (dt, *J* = 13.6, 3.3 Hz, 1H, 5-H<sub>a</sub>), 2.84 (d, *J* = 15.8 Hz, 1H, 9-H<sub>a</sub>), 2.52 (d, *J* = 15.8 Hz, 1H, 9-H<sub>b</sub>), 2.22 – 2.09 (m, 2H, 19-H), 1.84 (ddd, *J* = 13.2, 10.0, 3.6 Hz, 1H, 21-H<sub>a</sub>), 1.72 – 1.58 (m, 2H, 20-H), 1.50 (tq, *J* = 13.7, 2.9 Hz, 1H, 5-H<sub>b</sub>), 1.45 – 1.37 (m, 2H, 3-H, 21-H<sub>b</sub>), 1.34 (dq, *J* = 13.2, 3.7 Hz, 1H, 4-H<sub>a</sub>), 1.12 (qd, *J* = 12.7, 3.7 Hz, 1H, 4-H<sub>b</sub>), 0.97 (s, 3H, 7-H), 0.82 (d, *J* = 6.7 Hz, 3H, 8-H).

**<sup>13</sup>C NMR** (126 MHz, CDCl<sub>3</sub>, 298 K): δ [ppm] = 151.7 (C-14), 150.8 (C-11), 149.0 (C-18), 140.7 (C-15), 131.7 (C-10), 120.3 (C-6), 109.9 (C-13), 108.8 (C-12), 56.8 (C-22), 55.8 (C-16), 55.7 (C-1), 55.6 (C-17), 51.7 (C-2), 38.5 (C-9), 36.0 (C-3), 32.2 (C-21), 31.0 (C-4), 25.7 (C-19), 24.1 (C-5), 20.1 (C-20), 18.2 (C-8), 14.1 (C-7).

**FT-IR (ATR)**:  $\tilde{\nu}$  [cm<sup>-1</sup>] = 2930 (m), 2909 (w), 2874 (w), 2850 (w), 2830 (m), 1708 (w), 1673 (m), 1595 (w), 1491 (s), 1462 (m), 1437 (m), 1380 (w), 1360 (w), 1326 (w), 1305 (w), 1282 (w), 1253 (s), 1208 (m), 1170 (m), 1149 (m), 1125 (m), 1111 (w), 1093 (m), 1070 (m), 1056 (m), 1022 (m), 971 (m), 945 (w), 936 (w), 907 (w), 871 (w), 854 (w), 789 (m), 737 (w), 715 (m), 666 (w), 646 (w), 518 (w).

**GC-MS** (70 eV): *m/z* (%) = 342 (30, [M]<sup>+</sup>), 311 (100), 295 (22), 285 (9), 283 (9), 255 (4), 241 (9), 227 (4).

**HRMS** (ESI):

| Calc. [amu]                   | Found [amu]                   |
|-------------------------------|-------------------------------|
| 343.22677 [M+H] <sup>+</sup>  | 343.22754 [M+H] <sup>+</sup>  |
| 365.20872 [M+Na] <sup>+</sup> | 365.20848 [M+Na] <sup>+</sup> |

**[α]<sub>D</sub><sup>20</sup>** (*c* = 0.50 g/100 mL, CHCl<sub>3</sub>): + 346° (436 nm), + 185° (546 nm), + 159° (579 nm), + 152° (589 nm).

**X-ray crystal structure** (CCDC 2077907):

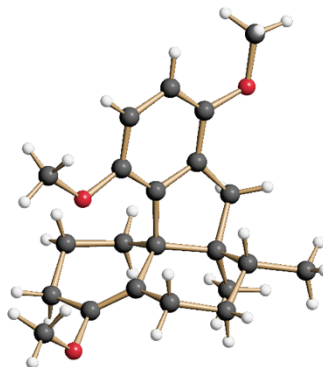

## 3.24. Synthesis of cyclopropane 19

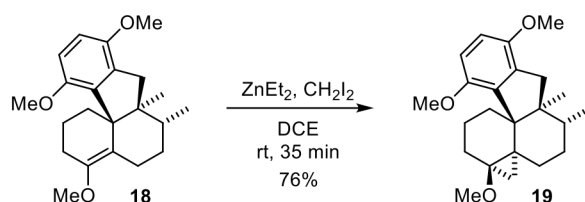

In an argon-flushed flask 61 mg (0.18 mmol, 1.0 eq.) of enol ether **18** were dissolved in 4.0 mL of dry DCE. The solution was cooled to 0°C and 0.71 mL (0.71 mmol, 4.0 eq.) of  $\text{ZnEt}_2$  (1.0 M in hexanes) were added over 20 s. Then, 0.12 mL (0.38 g, 1.4 mmol, 8.0 eq.) of  $\text{CH}_2\text{Cl}_2$  were added and the arising milk-like suspension was allowed to reach rt and stirred for 35 min. Excess reagent was quenched with 3 mL of sat. aqueous  $\text{NaHCO}_3$ . After addition of 55 mL of  $\text{H}_2\text{O}$  and extraction with 3 x 25 mL of MTBE the combined organic phases were dried over  $\text{Na}_2\text{SO}_4$  and the solvent was removed under reduced pressure. The crude product was purified by silica gel column chromatography (*c*-Hex/EtOAc 50:1) to provide 48 mg (0.14 mmol, 76%) of cyclopropane **19** as a colorless sticky oil, crystallizing upon repetitive dissolving in  $\text{CH}_2\text{Cl}_2$  and solvent removal *in vacuo*.

**C**<sub>23</sub>**H**<sub>32</sub>**O**<sub>3</sub> (**M** = 356.51 g/mol)

**R**<sub>f</sub> (*c*-Hex/EtOAc 19:1) = 0.37

**m.p.**: 87 °C – 90 °C

**<sup>1</sup>H NMR** (600 MHz,  $\text{CDCl}_3$ , 298 K):  $\delta$  [ppm] = 6.66 (d,  $J$  = 8.9 Hz, 1H, 13-H), 6.64 (d,  $J$  = 8.8 Hz, 1H, 12-H), 3.78 (s, 3H, 17-H), 3.77 (s, 3H, 16-H), 3.32 (s, 3H, 23-H), 2.72 (d,  $J$  = 15.6 Hz, 1H, 9-H<sub>a</sub>), 2.44 (d,  $J$  = 15.7 Hz, 1H, 9-H<sub>b</sub>), 2.10 – 2.00 (m, 2H, 19-H), 1.56 – 1.49 (m, 1H, 5-H<sub>a</sub>), 1.44 – 1.31 (m, 6H, 3-H, 4-H, 5-H<sub>b</sub>, 20-H<sub>a</sub>, 21-H<sub>a</sub>), 1.28 – 1.22 (m, 1H, 20-H<sub>b</sub>), 1.12 (dd,  $J$  = 9.3, 3.6 Hz, 1H, 21-H<sub>b</sub>), 1.00 (s, 3H, 7-H), 0.82 (d,  $J$  = 5.9 Hz, 3H, 8-H), 0.65 (dd,  $J$  = 5.2, 1.9 Hz, 1H, 22-H<sub>a</sub>), 0.41 (dd,  $J$  = 5.1, 1.4 Hz, 1H, 22-H<sub>b</sub>).

**<sup>13</sup>C NMR** (151 MHz,  $\text{CDCl}_3$ , 298 K):  $\delta$  [ppm] = 152.4 (C-14), 151.1 (C-11), 139.0 (C-15), 132.1 (C-10), 109.0 (C-13), 108.9 (C-12), 65.1 (C-18), 55.8 (C-17), 55.5 (C-16), 54.7 (C-1), 53.8 (C-23), 50.9 (C-2), 38.5 (C-9), 36.1 (C-3), 32.3 (C-6), 30.4 (C-4), 29.0 (C-5), 27.9 (C-19), 27.5 (C-21), 21.3 (C-22), 18.2 (C-8), 17.1 (C-20), 14.0 (C-7).

**FT-IR (ATR)**:  $\tilde{\nu}$  [ $\text{cm}^{-1}$ ] = 3061 (w), 2991 (w), 2931 (m), 2902 (w), 2874 (w), 2847 (w), 2829 (w), 1595 (w), 1492 (s), 1459 (m), 1437 (w), 1379 (w), 1353 (w), 1324 (w), 1300 (w), 1282 (w), 1255 (s), 1214 (w), 1201 (w), 1174 (m), 1160 (w), 1135 (w), 1097 (m), 1081 (w), 1049 (m), 1016 (w), 998 (w), 985 (w), 970 (w), 951 (w), 915 (w), 886 (w), 838 (w), 822 (w), 789 (m), 759 (w), 738 (w), 716 (m), 649 (w), 635 (w), 510 (w).

**GC-MS** (70 eV):  $m/z$  (%) = 356 (100,  $[\text{M}]^+$ ), 324 (28), 309 (26), 271 (51), 257 (25), 255 (26), 216 (29), 215 (42), 201 (26), 189 (26), 85 (18).

**HRMS** (ESI):

Calc. [amu]

Found [amu]

379.22437  $[\text{M}+\text{Na}]^+$

379.22467  $[\text{M}+\text{Na}]^+$

**$[\alpha]^{20}_\lambda$**  (*c* = 1.00 g/100 mL,  $\text{CHCl}_3$ ): + 71° (436 nm), + 38° (546 nm), + 34° (579 nm), + 30° (589 nm).

**X-ray crystal structure** (CCDC 2077911):

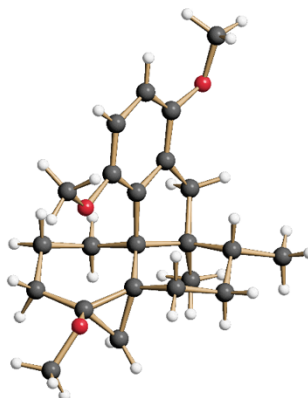

3.25. Synthesis of ketone **20**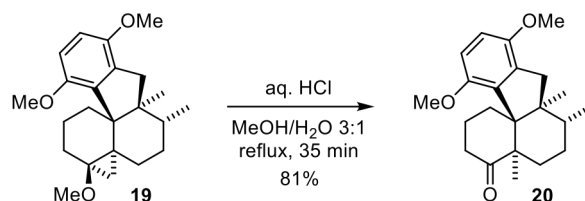

In an argon-flushed flask 46 mg (0.13 mmol, 1.0 eq.) of cyclopropane **19** were dissolved in 4.5 mL of MeOH (under gentle warming), 1.5 mL of conc. HCl<sub>(aq)</sub> were added and the mixture was refluxed for 35 min. The solution was allowed to cool to rt, before it was neutralized with 20 mL of sat. aqueous NaHCO<sub>3</sub>. The aqueous phase was extracted with 3 x 15 mL of MTBE, the combined organic phases were dried over Na<sub>2</sub>SO<sub>4</sub> and the solvent was removed under reduced pressure. The crude product was purified by silica gel column chromatography (*c*-Hex/EtOAc 10:1) to provide 36 mg (0.11 mmol, 81%) of ketone **20** as a colorless, crystalline solid.

**C<sub>22</sub>H<sub>30</sub>O<sub>3</sub>** (*M* = 342.48 g/mol)

*R<sub>f</sub>* (*c*-Hex/EtOAc 9:1) = 0.24

*m.p.*: 125 °C – 128 °C

**<sup>1</sup>H NMR** (500 MHz, CDCl<sub>3</sub>, 298 K): δ [ppm] = 6.64 (d, *J* = 8.7 Hz, 1H, 12-H), 6.59 (d, *J* = 8.7 Hz, 1H, 13-H), 3.76 (s, 3H, 16-H), 3.55 (s, 3H, 17-H), 2.72 (d, *J* = 15.9 Hz, 1H, 9-H<sub>a</sub>), 2.56 – 2.46 (m, 1H, 19-H<sub>a</sub>), 2.50 (d, *J* = 15.8 Hz, 1H, 9-H<sub>b</sub>), 2.27 (dd, *J* = 17.2, 6.0 Hz, 1H, 19-H<sub>b</sub>), 2.17 (td, *J* = 13.5, 4.2 Hz, 1H, 21-H<sub>a</sub>), 1.99 – 1.90 (m, 1H, 5-H<sub>a</sub>), 1.76 – 1.68 (m, 1H, 20-H<sub>a</sub>), 1.57 – 1.46 (m, 1H, 20-H<sub>b</sub>), 1.46 – 1.37 (m, 4H, 4-H, 5-H<sub>b</sub>, 21-H<sub>b</sub>), 1.37 – 1.32 (m, 1H, 3-H), 1.31 (s, 3H, 22-H), 1.15 (s, 3H, 7-H), 0.84 (d, *J* = 6.5 Hz, 3H, 8-H).

**<sup>13</sup>C NMR** (126 MHz, CDCl<sub>3</sub>, 298 K): δ [ppm] = 212.2 (C-18), 151.4 (C-14), 151.1 (C-11), 138.3 (C-15), 131.7 (C-10), 109.20 (C-12), 109.18 (C-13), 59.7 (C-1), 55.7 (C-16), 53.2 (C-17), 50.7 (C-2), 50.3 (C-6), 40.1 (C-9), 36.4 (C-19), 35.1 (C-3), 28.8 (C-5), 27.3 (C-21), 27.2 (C-4), 22.8 (C-22), 20.7 (C-20), 17.7 (C-8), 17.4 (C-7).

**FT-IR (ATR)**:  $\tilde{\nu}$  [cm<sup>-1</sup>] = 3028 (w), 2935 (m), 2881 (w), 2833 (w), 1701 (s), 1595 (w), 1493 (s), 1460 (m), 1415 (w), 1386 (w), 1347 (w), 1321 (w), 1277 (w), 1256 (s), 1194 (w), 1172 (w), 1151 (w), 1128 (w), 1115 (w), 1091 (m), 1065 (w), 1056 (w), 1045 (m), 1023 (w), 1005 (w), 974 (m), 957 (w), 927 (w), 853 (w), 827 (w), 798 (m), 720 (m), 676 (w), 648 (w), 578 (w), 560 (w), 523 (w).

**GC-MS** (70 eV): *m/z* (%) = 342 (100, [M]<sup>+</sup>), 286 (12), 271 (8), 257 (11), 232 (10), 217 (9), 203 (8), 189 (8), 175 (7), 109 (7).

**HRMS** (ESI):

| Calc. [amu]                   | Found [amu]                   |
|-------------------------------|-------------------------------|
| 343.22677 [M+H] <sup>+</sup>  | 343.22720 [M+H] <sup>+</sup>  |
| 365.20872 [M+Na] <sup>+</sup> | 365.20884 [M+Na] <sup>+</sup> |

[α]<sub>D</sub><sup>20</sup> (*c* = 0.50 g/100 mL, CHCl<sub>3</sub>): + 8.6° (436 nm), + 0.9° (546 nm), + 0.4° (579 nm), + 0.0° (589 nm).

**X-ray crystal structure** (CCDC 2077908):

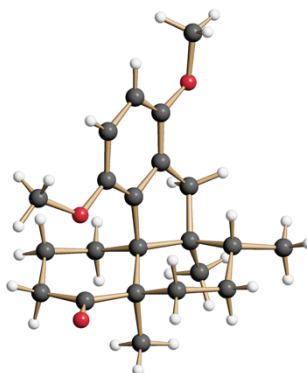

3.26. Synthesis of allylic alcohol **25**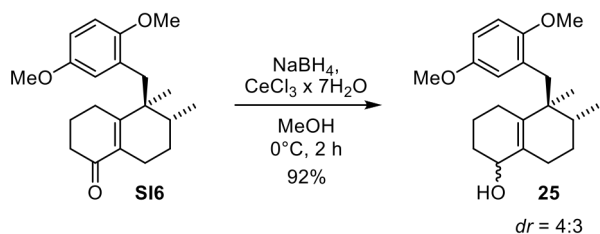

A solution of 27 mg (0.082 mmol, 1.0 eq.) of enone **16** in 0.80 mL of MeOH was cooled to 0°C before 37 mg (0.099 mmol, 1.2 eq.) of  $\text{CeCl}_3 \times 7 \text{H}_2\text{O}$  and 8.0 mg (0.21 mmol, 2.6 eq.) of  $\text{NaBH}_4$  were added and the mixture allowed to stir for 2 h at 0°C. After addition of  $\text{H}_2\text{O}$  and extraction with 3x EtOAc the combined organic phases were washed with  $\text{H}_2\text{O}$ , dried over  $\text{MgSO}_4$  and the solvent was removed under reduced pressure to give 25 mg (0.076 mmol, 92%) of a diastereomeric mixture ( $dr = 4:3$ ) of allylic alcohol **25** as a pale yellow oil.

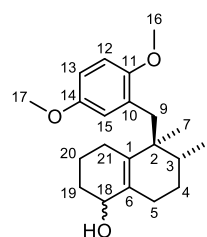

**C<sub>21</sub>H<sub>30</sub>O<sub>3</sub>** (**M** = 330.47 g/mol)

**R<sub>f</sub>** (*c*-Hex/EtOAc 1:1) = 0.61 (single spot for both diastereomers)

**<sup>1</sup>H NMR** (500 MHz,  $\text{CDCl}_3$ , 298 K): Major diastereomer:  $\delta$  [ppm] = 6.77 (d,  $J = 3.6$  Hz, 1H, 15-H), 6.77 – 6.75 (m, 1H, 12-H), 6.70 – 6.66 (m, 1H, 13-H), 3.97 (t,  $J = 4.0$  Hz, 1H, 18-H), 3.76 (s, 3H, 17-H), 3.69 (s, 3H, 16-H), 2.96 (d,  $J = 15.5$  Hz, 1H, 9-H<sub>a</sub>), 2.64 (d,  $J = 15.5$  Hz, 1H, 9-H<sub>b</sub>), 2.43 – 2.37 (m, 1H, 5-H<sub>a</sub>), 2.17 – 2.14 (m, 1H, 4-H<sub>a</sub>), 2.06 – 1.98 (m, 1H, 4-H<sub>b</sub>)\*, 1.91 – 1.85 (m, 1H, 21-H<sub>a</sub>)\*, 1.77 – 1.68 (m, 2H, 19-H), 1.74 – 1.70 (m, 2H, 3-H, 5-H<sub>b</sub>), 1.67 – 1.54 (m, 2H, 20-H), 1.42 – 1.37 (m, 1H, 21-H<sub>b</sub>)\*, 0.96 (s, 3H, 7-H), 0.81 (d,  $J = 6.4$  Hz, 3H, 8-H). Minor diastereomer:  $\delta$  [ppm] = 6.77 – 6.75 (m, 0.8H, 12-H), 6.75 (d,  $J = 3.5$  Hz, 0.8H, 15-H), 6.70 – 6.66 (m, 0.8H, 13-H), 3.90 (t,  $J = 4.0$  Hz, 0.8H, 18-H), 3.753 (s, 2.3H, 17-H), 3.749 (s, 2.3H, 16-H), 2.95 (d,  $J = 14.3$  Hz, 0.8H, 9-H<sub>a</sub>), 2.61 (d,  $J = 14.3$  Hz, 0.8H, 9-H<sub>b</sub>), 2.06 – 1.98 (m, 0.8H, 4-H<sub>a</sub>)\*, 1.95 – 1.89 (m, 0.8H, 4-H<sub>b</sub>)\*, 1.91 – 1.85 (m, 0.8H, 21-H<sub>a</sub>)\*, 1.77 – 1.68 (m, 1.6H, 19-H), 1.71 – 1.66 (m, 0.8H, 5-H<sub>a</sub>)\*, 1.70 – 1.67 (m, 0.8H, 3-H), 1.67 – 1.54 (m, 1.6H, 20-H), 1.46 – 1.42 (m, 0.8H, 5-H<sub>b</sub>)\*, 1.42 – 1.37 (m, 0.8H, 21-H<sub>b</sub>)\*, 0.92 (s, 2.3H, 7-H), 0.80 (d,  $J = 6.5$  Hz, 2.3H, 8-H). \*Assignments possibly interconvertible.

**<sup>13</sup>C NMR** (126 MHz,  $\text{CDCl}_3$ , 298 K): Major diastereomer:  $\delta$  [ppm] = 153.21 (C-14), 152.5 (C-11), 138.9 (C-1), 131.1 (C-6), 129.5 (C-10), 116.1 (C-15), 111.33 (C-12), 111.31 (C-13), 69.3 (C-18), 56.1 (C-17), 55.7 (C-16), 41.4 (C-2), 34.4 (C-9), 33.6 (C-3), 32.3 (C-19), 26.7 (C-5), 26.6 (C-21), 25.6 (C-4), 22.2 (C-7), 19.1 (C-20), 16.2 (C-8). Minor diastereomer:  $\delta$  [ppm] = 153.16 (C-14), 152.6 (C-11), 138.1 (C-1), 130.7 (C-6), 129.6 (C-10), 117.4 (C-15), 111.6 (C-12), 111.2 (C-13), 69.7 (C-18), 56.2 (C-17), 55.8 (C-16), 41.8 (C-2), 36.8 (C-9), 34.0 (C-3), 32.1 (C-19), 26.2 (C-5), 26.1 (C-21), 25.8 (C-4), 21.5 (C-7), 19.0 (C-20), 16.1 (C-8).

**FT-IR (ATR)**:  $\tilde{\nu}$  [ $\text{cm}^{-1}$ ] = 3407 (br), 2926 (s), 2856 (w), 2834 (w), 1730 (br), 1607 (w), 1589 (w), 1499 (s), 1464 (m), 1380 (m), 1346 (w), 1325 (w), 1274 (w), 1222 (s), 1179 (m), 1159 (w), 1123 (w), 1050 (m), 1030 (w), 996 (w), 926 (w), 880 (w), 868 (w), 803 (m), 715 (m).

**GC-MS** (70 eV):  $m/z$  (%) = 330 (1, [M]<sup>+</sup>), 312 (15), 179 (45), 161 (100), 152 (62), 137 (61), 119 (38), 105 (38), 91 (52).

**HRMS** (ESI):

| Calc. [amu]                   | Found [amu]                   |
|-------------------------------|-------------------------------|
| 353.20872 [M+Na] <sup>+</sup> | 353.20907 [M+Na] <sup>+</sup> |

**[ $\alpha$ ]<sub>D</sub><sup>20</sup>** (*c* = 0.50 g/100 mL,  $\text{CHCl}_3$ ): + 0.3° (436 nm), + 0.7° (546 nm), + 0.4° (579 nm), + 0.1° (589 nm).

3.27. Synthesis of olefin **17** from allylic alcohol **25**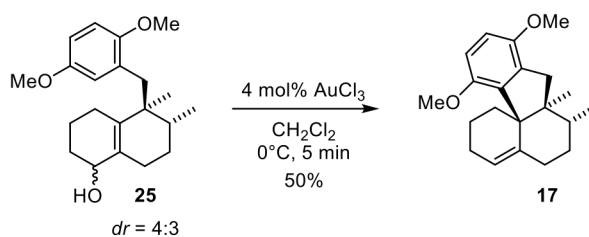

In an argon-flushed flask 20 mg (0.061 mmol, 1.0 eq.) of a diastereomeric mixture ( $dr = 4:3$ ) of allylic alcohol **25** were dissolved in 6.0 mL of  $\text{CH}_2\text{Cl}_2$ . The solution was cooled to  $0^\circ\text{C}$ , 0.73 mg (0.0024 mmol, 0.039 eq.) of  $\text{AuCl}_3$  in 0.66 mL of  $\text{CH}_2\text{Cl}_2$  were added and the green reaction mixture was stirred for 5 min at that temperature. 5 mg of QuadraSil TA® were added and the suspension was stirred for further 15 min at  $0^\circ\text{C}$ . The solids were separated by filtration and the solvent was removed under reduced pressure. The crude product was purified by silica gel column chromatography (*c*-Hex/EtOAc 30:1) to give 11 mg as a colorless sticky oil, containing approximately 9.4 mg (0.030 mmol, 50%) of olefin **17** along with inseparable side products, which was determined by integration of suitable  $^1\text{H-NMR}$  signals.

The analytical data of **17** were identical to those given above (section 3.9).



#### 4. Comparison of NMR Data of Natural (+)-dysiherbol A (*ent*-**31**) and Synthetic (–)-dysiherbol A (**31**)

##### 4.1. Comparison of <sup>1</sup>H NMR spectroscopic data

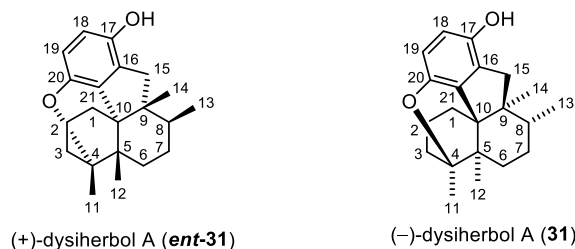

| Position   | Natural (+)-dysiherbol A<br>( <i>ent</i> - <b>31</b> ) <sup>[14]</sup> | Synthetic (–)-dysiherbol A<br>( <b>31</b> )       | $\Delta\delta_{\text{H}}$ |
|------------|------------------------------------------------------------------------|---------------------------------------------------|---------------------------|
|            | $\delta_{\text{H}}$ (CDCl <sub>3</sub> , 600 MHz)                      | $\delta_{\text{H}}$ (CDCl <sub>3</sub> , 500 MHz) |                           |
| 1 $\alpha$ | 1.84, td (12.6, 4.8 Hz)                                                | 1.85, td (12.7, 4.4 Hz)                           | +0.01                     |
| 1 $\beta$  | 1.37, m                                                                | 1.35, m                                           | –0.02                     |
| 2          | 1.49, m                                                                | 1.50, m                                           | +0.01                     |
|            | 1.30, m                                                                | 1.30, m                                           | 0.00                      |
| 3 $\alpha$ | 1.95, td (13.8, 6.6 Hz)                                                | 1.96, td (14.1, 6.5 Hz)                           | +0.01                     |
| 3 $\beta$  | 1.68, dd (14.4, 6.0 Hz)                                                | 1.68, dd (14.6, 5.8 Hz)                           | 0.00                      |
| 4          |                                                                        |                                                   |                           |
| 5          |                                                                        |                                                   |                           |
| 6 $\alpha$ | 1.36, td (13.2, 4.2 Hz)                                                | 1.39, m                                           | +0.03                     |
| 6 $\beta$  | 1.28, m                                                                | 1.32, m                                           | +0.04                     |
| 7 $\alpha$ | 1.32, m                                                                | 1.32, m                                           | 0.00                      |
| 7 $\beta$  | 1.22, m                                                                | 1.23, m                                           | +0.01                     |
| 8          | 1.24, m                                                                | 1.22, m                                           | –0.02                     |
| 9          |                                                                        |                                                   |                           |
| 10         |                                                                        |                                                   |                           |
| 11         | 1.22, s                                                                | 1.22, s                                           | 0.00                      |
| 12         | 1.21, s                                                                | 1.21, s                                           | 0.00                      |
| 13         | 0.83, d (6.6 Hz)                                                       | 0.83, d (6.6 Hz)                                  | 0.00                      |
| 14         | 1.07, s                                                                | 1.08, s                                           | +0.01                     |
| 15         | 2.57, d (14.4 Hz)                                                      | 2.57, d (15.2 Hz)                                 | 0.00                      |
|            | 2.54, d (14.4 Hz)                                                      | 2.54, d (15.0 Hz)                                 | 0.00                      |
| 16         |                                                                        |                                                   |                           |
| 17         |                                                                        |                                                   |                           |
| 17-OH      | 4.23, br                                                               | 4.20, br                                          | –0.03                     |
| 18         | 6.49, d (8.4 Hz)                                                       | 6.49, d (8.5 Hz)                                  | 0.00                      |
| 19         | 6.43, d (8.4 Hz)                                                       | 6.43, d (8.5 Hz)                                  | 0.00                      |
| 20         |                                                                        |                                                   |                           |
| 21         |                                                                        |                                                   |                           |

4.2. Comparison of  $^1\text{H}$  NMR Spectra (top: natural (+)-dysiherbol A (*ent*-31)<sup>[14]</sup>, bottom: synthetic (-)-dysiherbol A (31))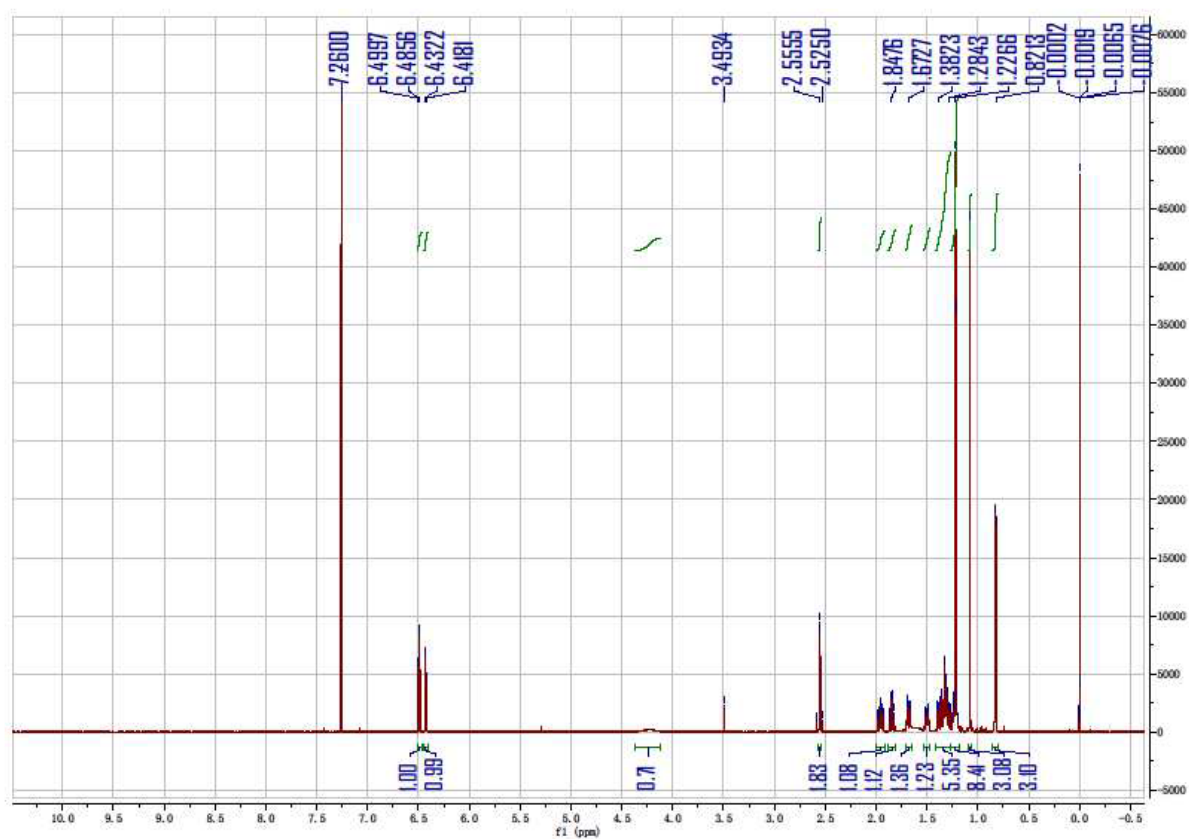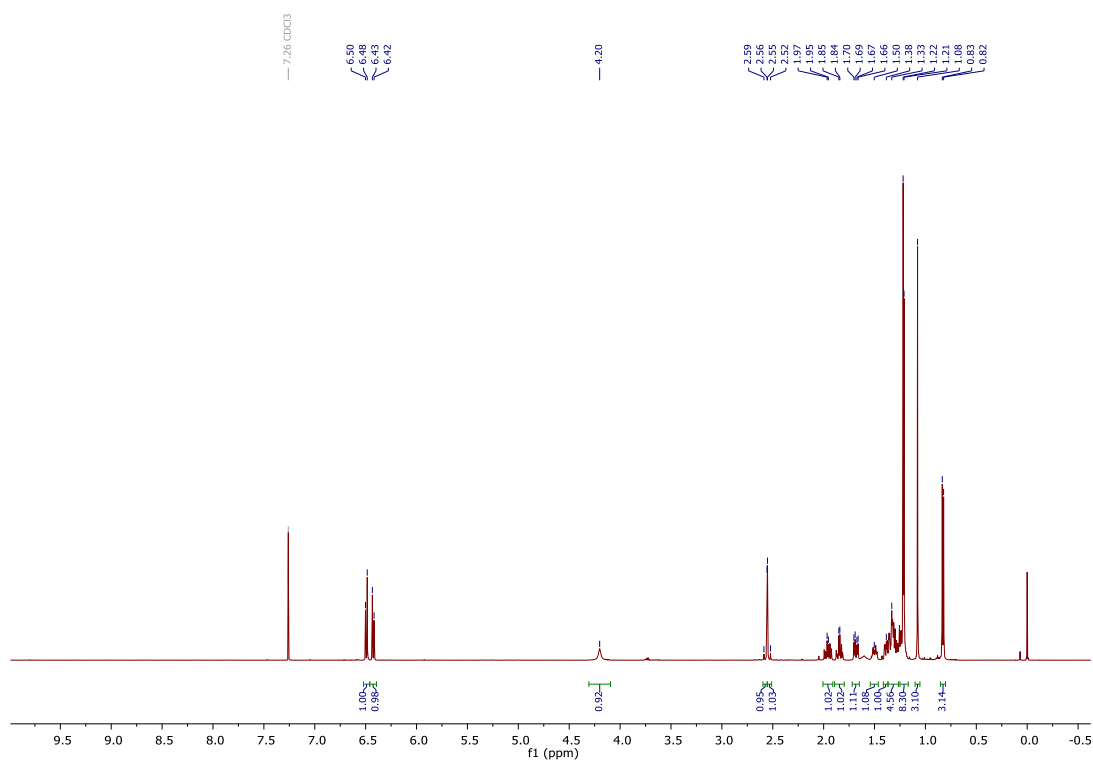

4.3. Comparison of  $^{13}\text{C}$  NMR Spectroscopic Data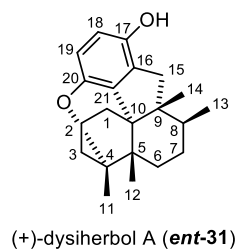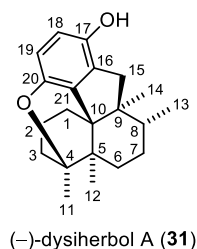

| Position | Natural (+)-dysiherbol A<br>( <i>ent</i> - <b>31</b> ) <sup>[14]</sup><br>$\delta_{\text{C}}$ (CDCl <sub>3</sub> , 150 MHz) | Synthetic (-)-dysiherbol A ( <b>31</b> )<br>$\delta_{\text{C}}$ (CDCl <sub>3</sub> , 126 MHz) |                                  | $\Delta\delta_{\text{C}}$ |
|----------|-----------------------------------------------------------------------------------------------------------------------------|-----------------------------------------------------------------------------------------------|----------------------------------|---------------------------|
|          | $\delta_{\text{CDCl}_3} = 77.00$                                                                                            | $\delta_{\text{CDCl}_3} = 77.16$                                                              | $\delta_{\text{CDCl}_3} = 77.00$ |                           |
| 1        | 26.36                                                                                                                       | 26.5                                                                                          | 26.36                            | 0.0                       |
| 2        | 19.7                                                                                                                        | 19.9                                                                                          | 19.7                             | 0.0                       |
| 3        | 35.7                                                                                                                        | 35.8                                                                                          | 35.7                             | 0.0                       |
| 4        | 82.4                                                                                                                        | 82.6                                                                                          | 82.4                             | 0.0                       |
| 5        | 37.2                                                                                                                        | 37.4                                                                                          | 37.2                             | 0.0                       |
| 6        | 29.9                                                                                                                        | 30.1                                                                                          | 29.9                             | 0.0                       |
| 7        | 26.41                                                                                                                       | 26.6                                                                                          | 26.41                            | 0.0                       |
| 8        | 35.5                                                                                                                        | 35.6                                                                                          | 35.5                             | 0.0                       |
| 9        | 51.9                                                                                                                        | 52.0                                                                                          | 51.8                             | -0.1                      |
| 10       | 49.1                                                                                                                        | 49.3                                                                                          | 49.1                             | 0.0                       |
| 11       | 21.9                                                                                                                        | 22.1                                                                                          | 21.9                             | 0.0                       |
| 12       | 18.5                                                                                                                        | 18.6                                                                                          | 18.5                             | 0.0                       |
| 13       | 17.8                                                                                                                        | 17.9                                                                                          | 17.8                             | 0.0                       |
| 14       | 14.9                                                                                                                        | 15.0                                                                                          | 14.9                             | 0.0                       |
| 15       | 39.3                                                                                                                        | 39.5                                                                                          | 39.3                             | 0.0                       |
| 16       | 125.8                                                                                                                       | 126.0                                                                                         | 125.8                            | 0.0                       |
| 17       | 145.5                                                                                                                       | 145.7                                                                                         | 145.5                            | 0.0                       |
| 18       | 114.2                                                                                                                       | 114.4                                                                                         | 114.2                            | 0.0                       |
| 19       | 111.1                                                                                                                       | 111.2                                                                                         | 111.1                            | 0.0                       |
| 20       | 148.3                                                                                                                       | 148.5                                                                                         | 148.3                            | 0.0                       |
| 21       | 133.1                                                                                                                       | 133.2                                                                                         | 133.1                            | 0.0                       |

4.4. Comparison of  $^{13}\text{C}$  NMR Spectra (top: natural (+)-dysiherbol A (*ent*-31)<sup>[14]</sup>, bottom: synthetic (-)-dysiherbol A (31))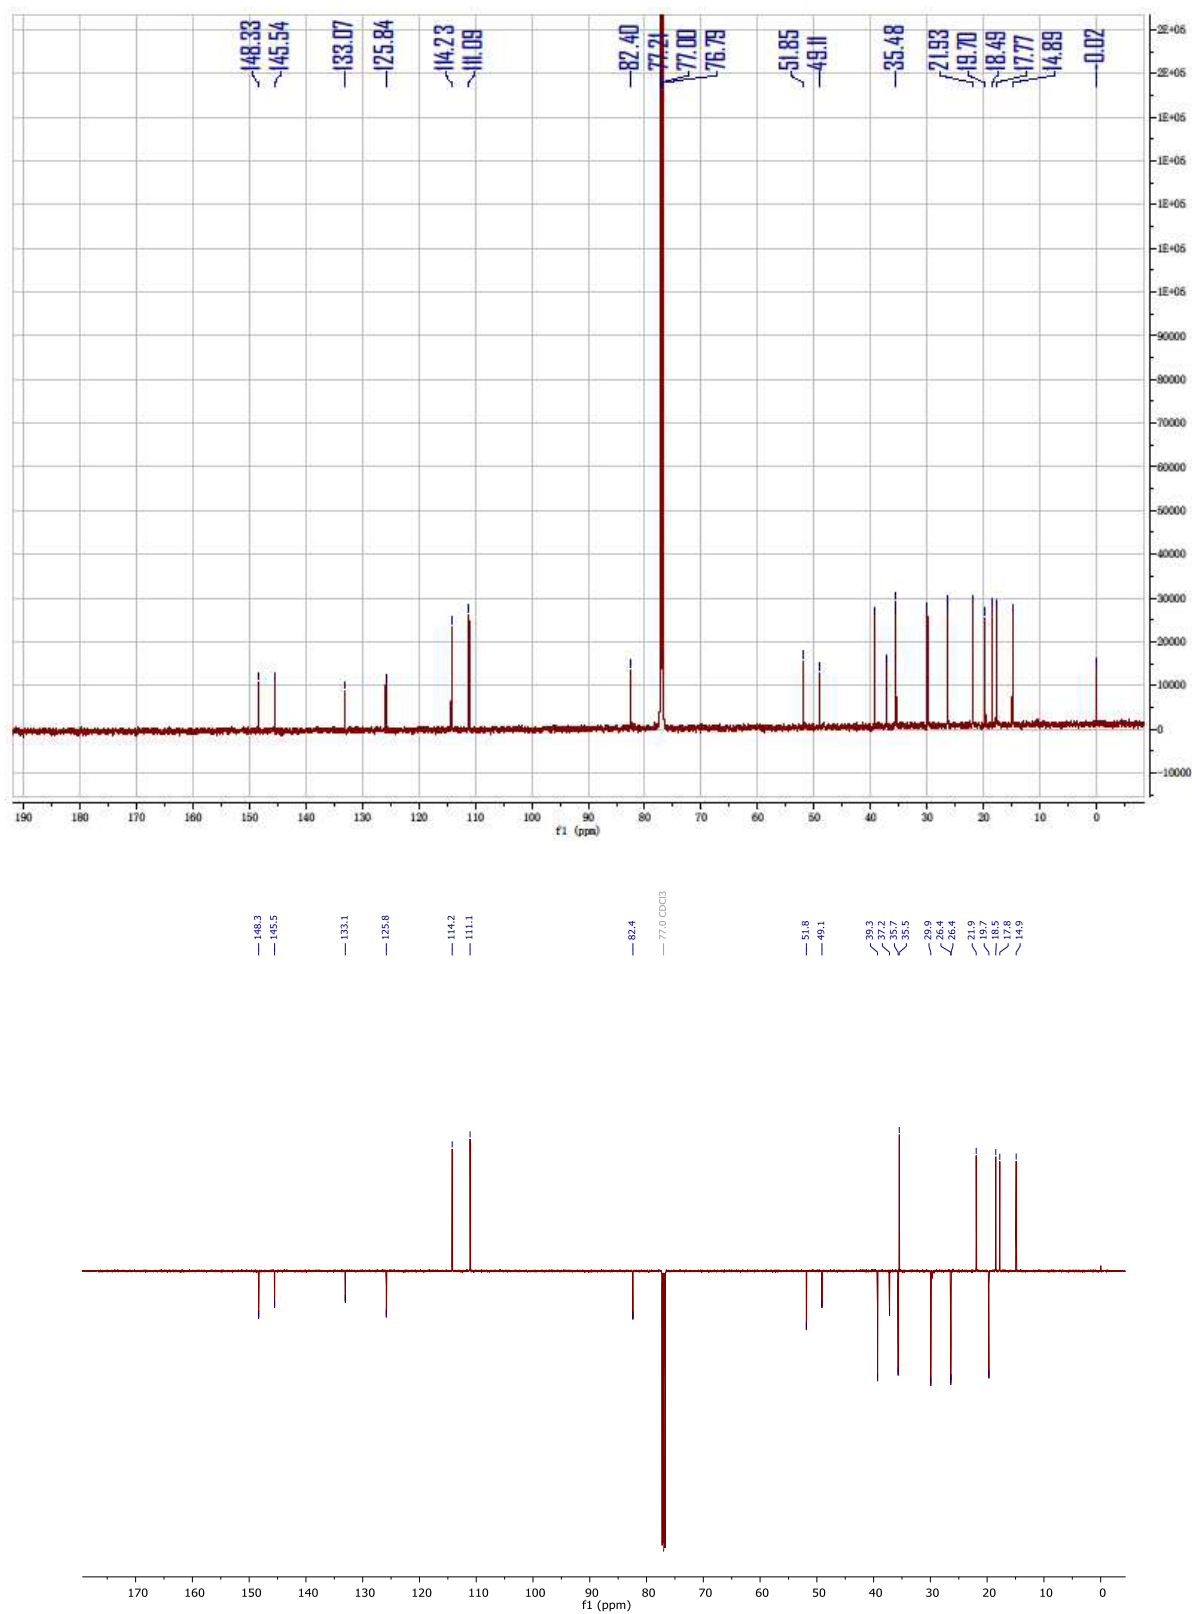

## 5. Further Analytical Spectra of (-)-dysiherbol A (31)

5.1.  $^1\text{H}$ ,  $^{13}\text{C}$ -HSQCed and  $^1\text{H}$ ,  $^{13}\text{C}$ -HMBC spectra of (-)-dysiherbol A (31)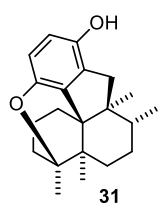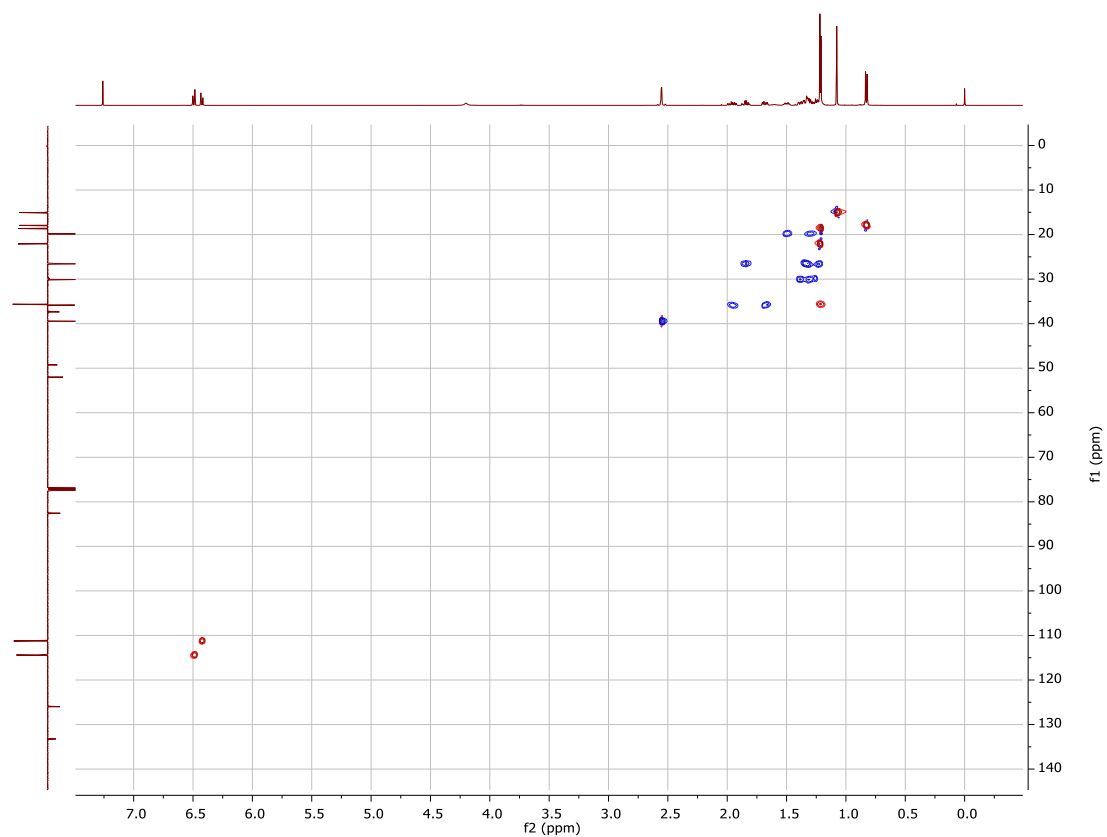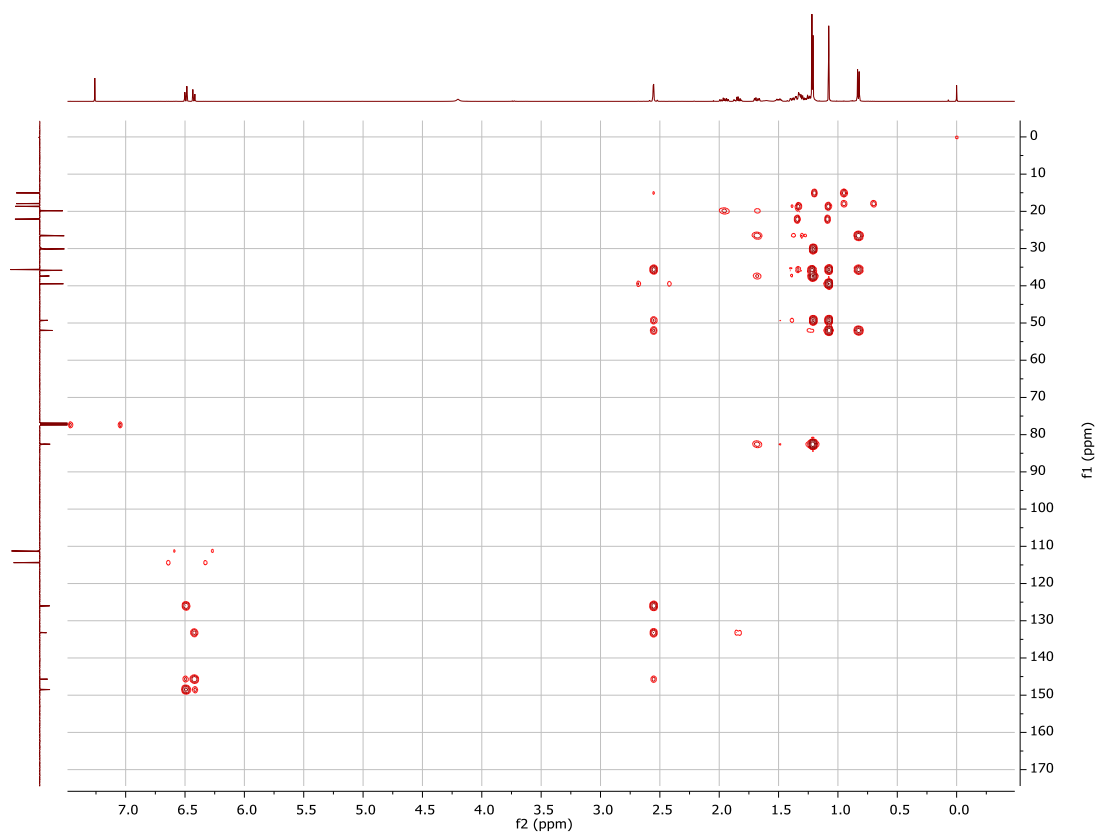

5.2.  $^1\text{H},^1\text{H}$ -COSY and  $^1\text{H},^1\text{H}$ -NOESY Spectrum of (-)-dysiherbol A (31)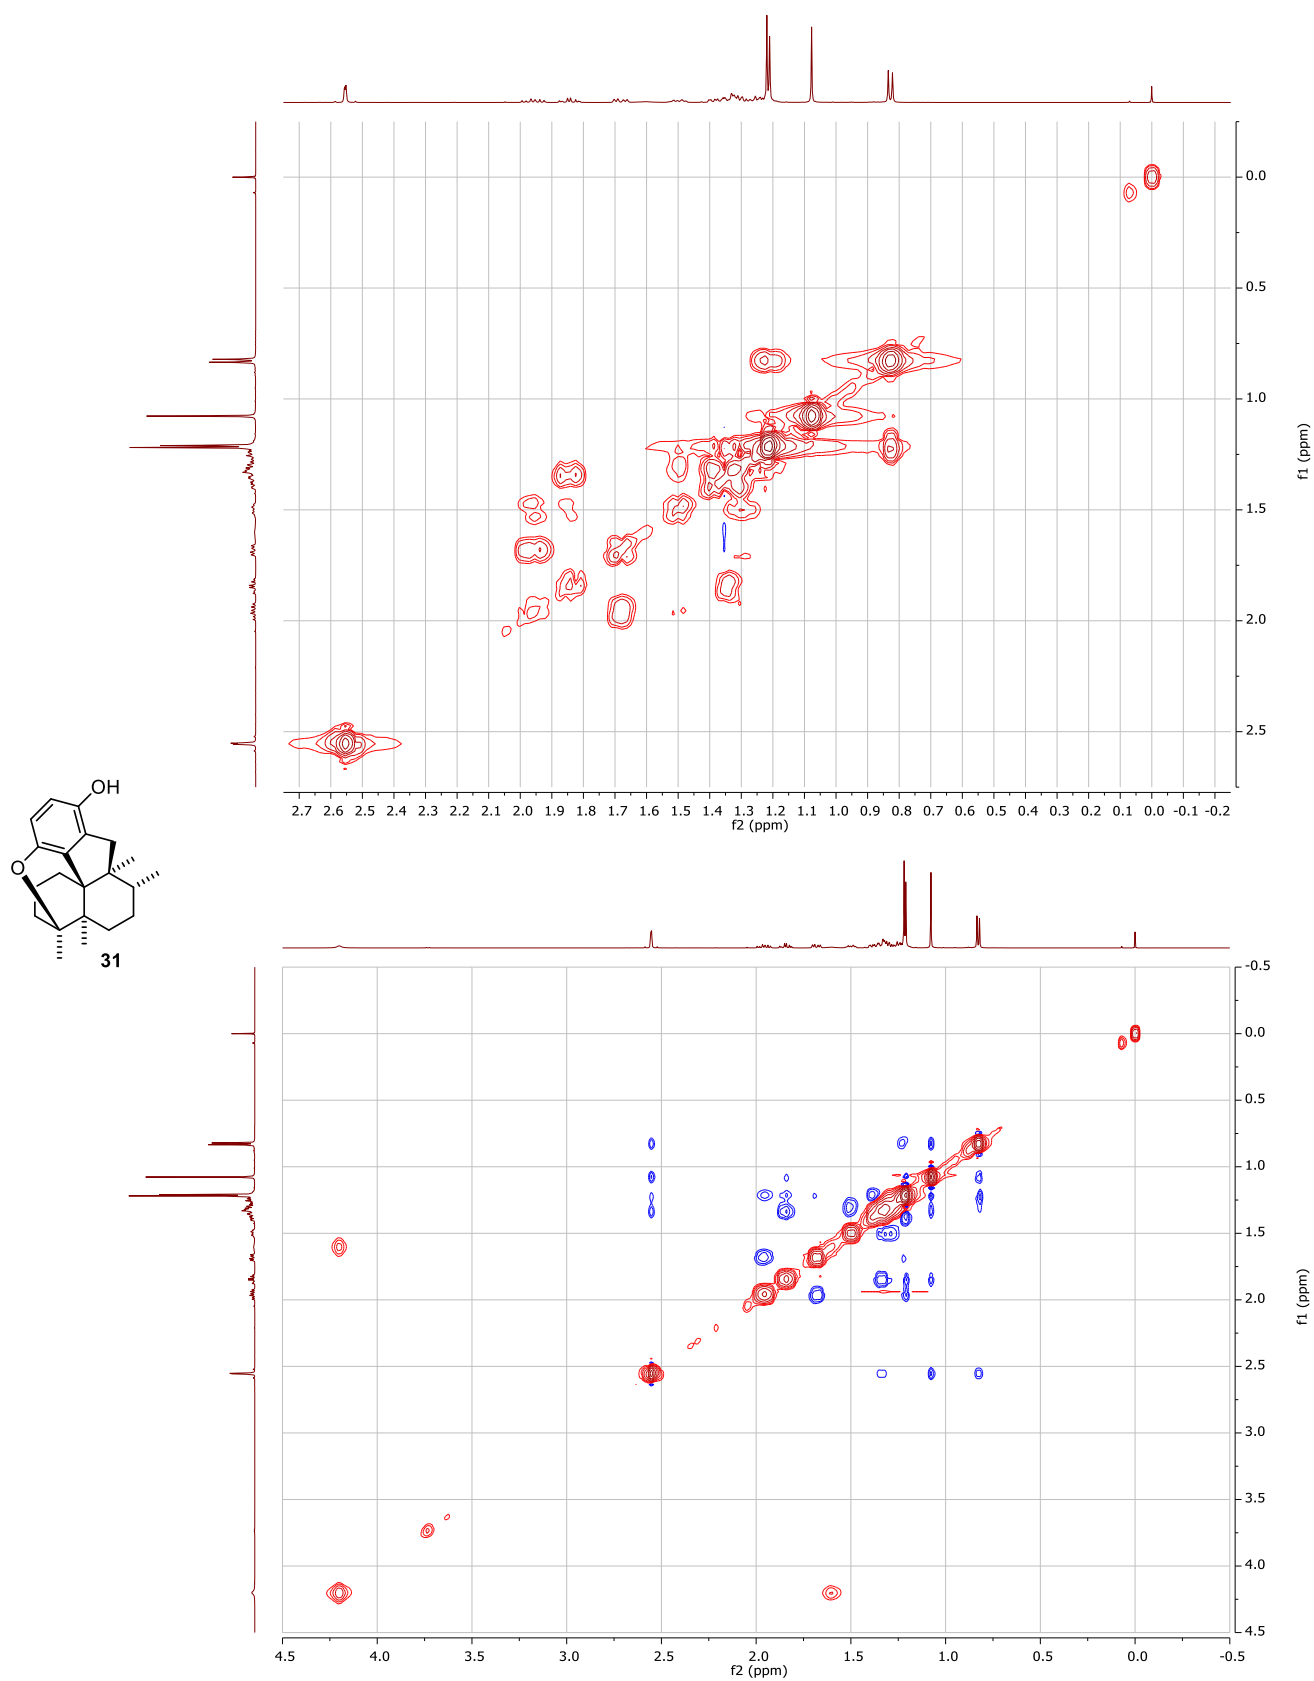

## 5.3. IR Spectrum of (-)-dysiherbol A (31)

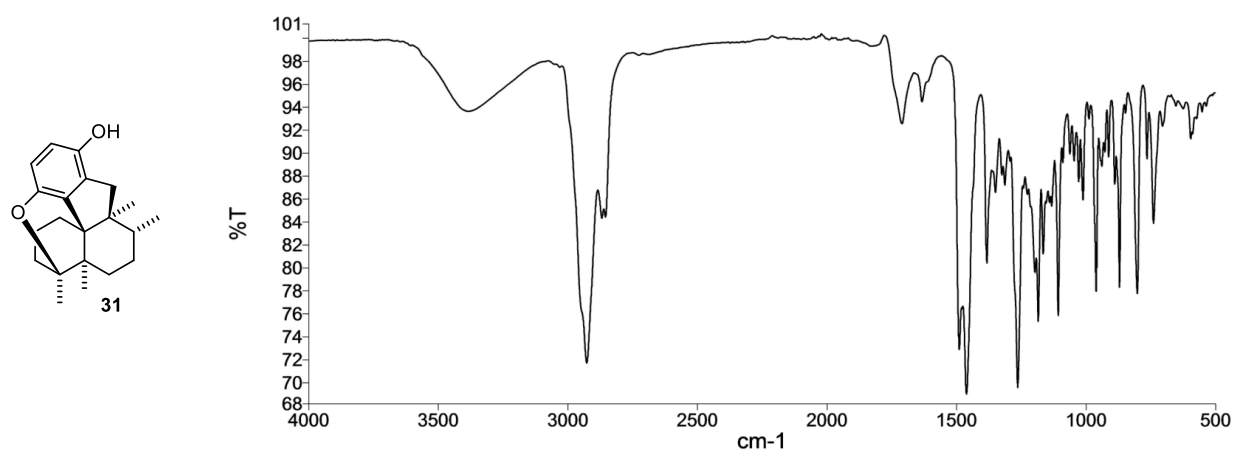

## 5.4. UV Spectrum of (-)-dysiherbol A (31)

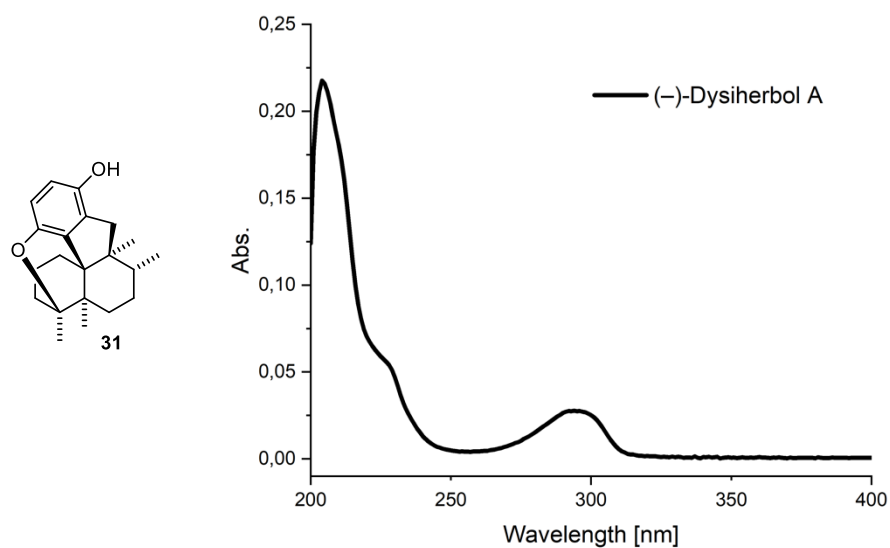

## 5.5. ECD Spectrum of (-)-dysiherbol A (31)

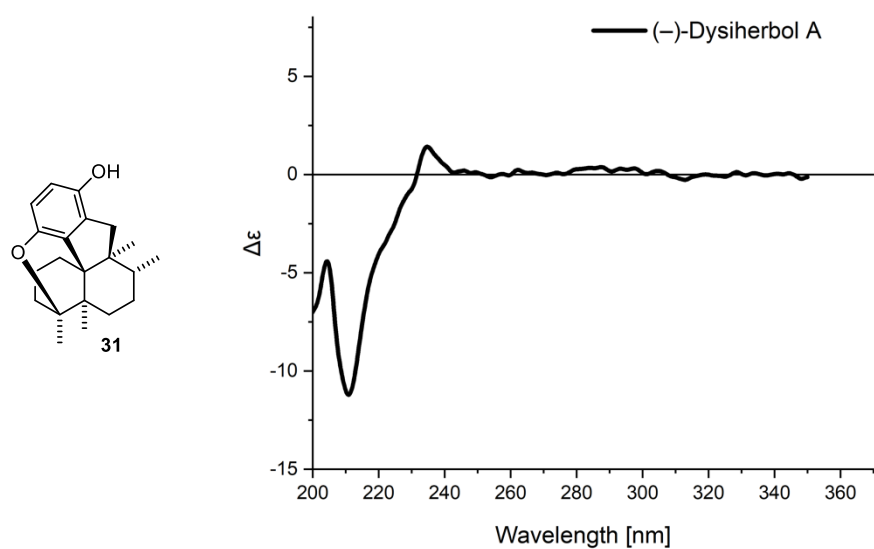

## 6. NMR Spectra

6.1.  $^1\text{H}$  and  $^{13}\text{C}$  NMR of 2-(Iodomethyl)-1,4-dimethoxybenzene (**12**)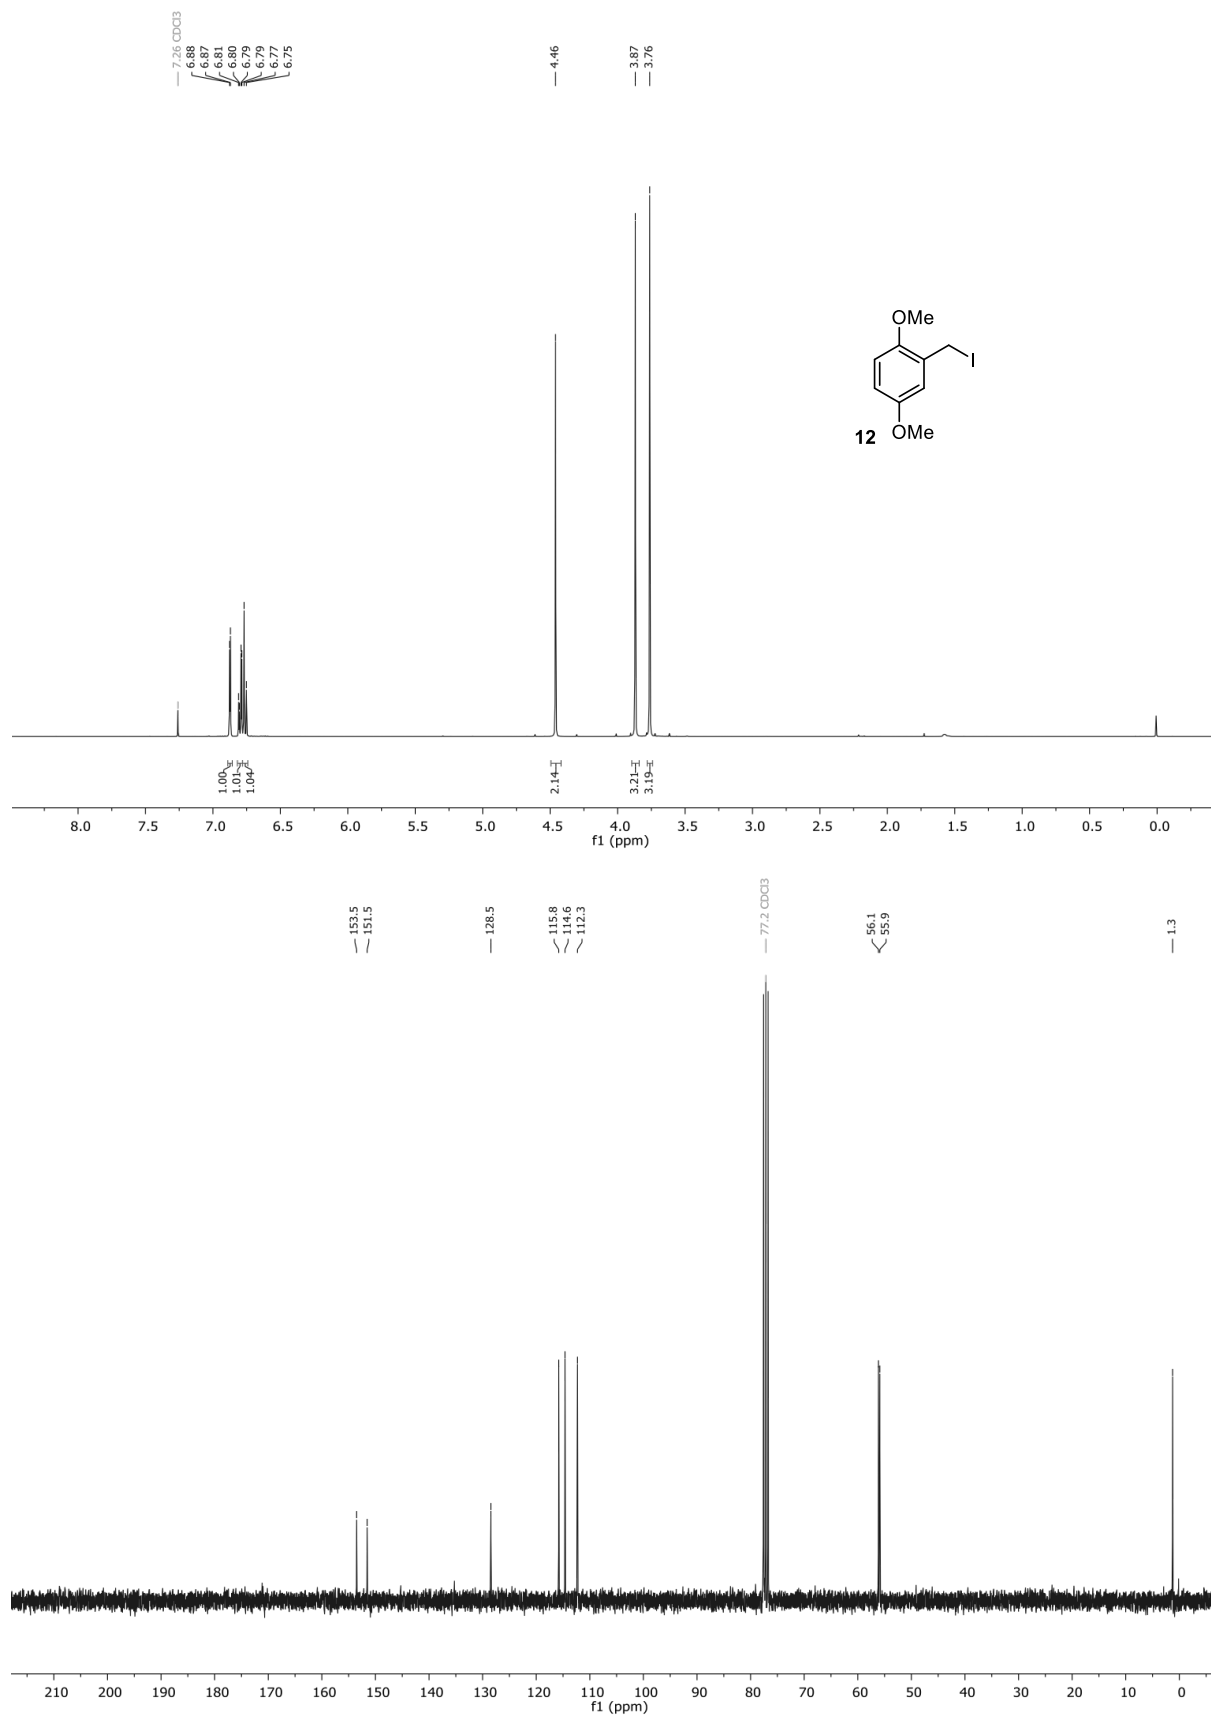



6.2.  $^1\text{H}$ ,  $^{13}\text{C}$  and  $^{31}\text{P}$  NMR of Tris-(pyrrolidinyl)-phosphoramidate (TPPA)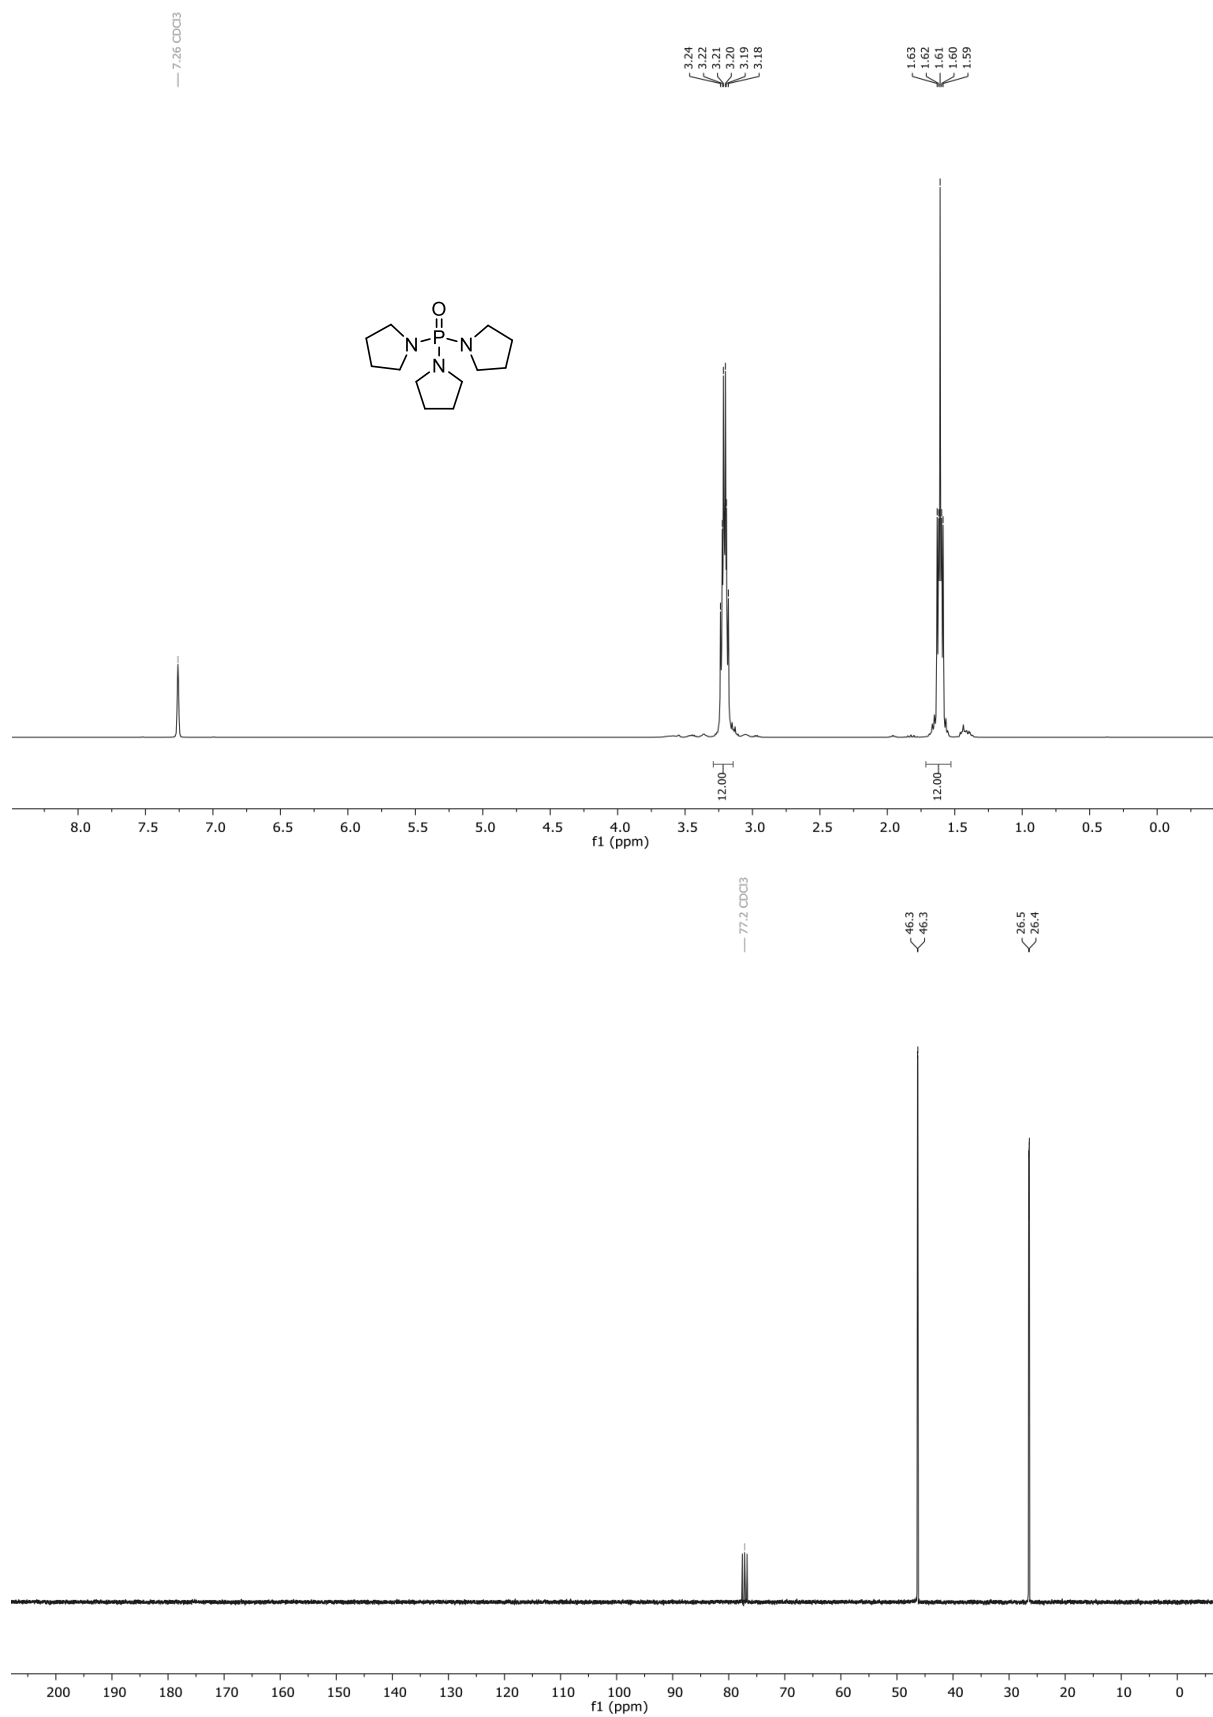

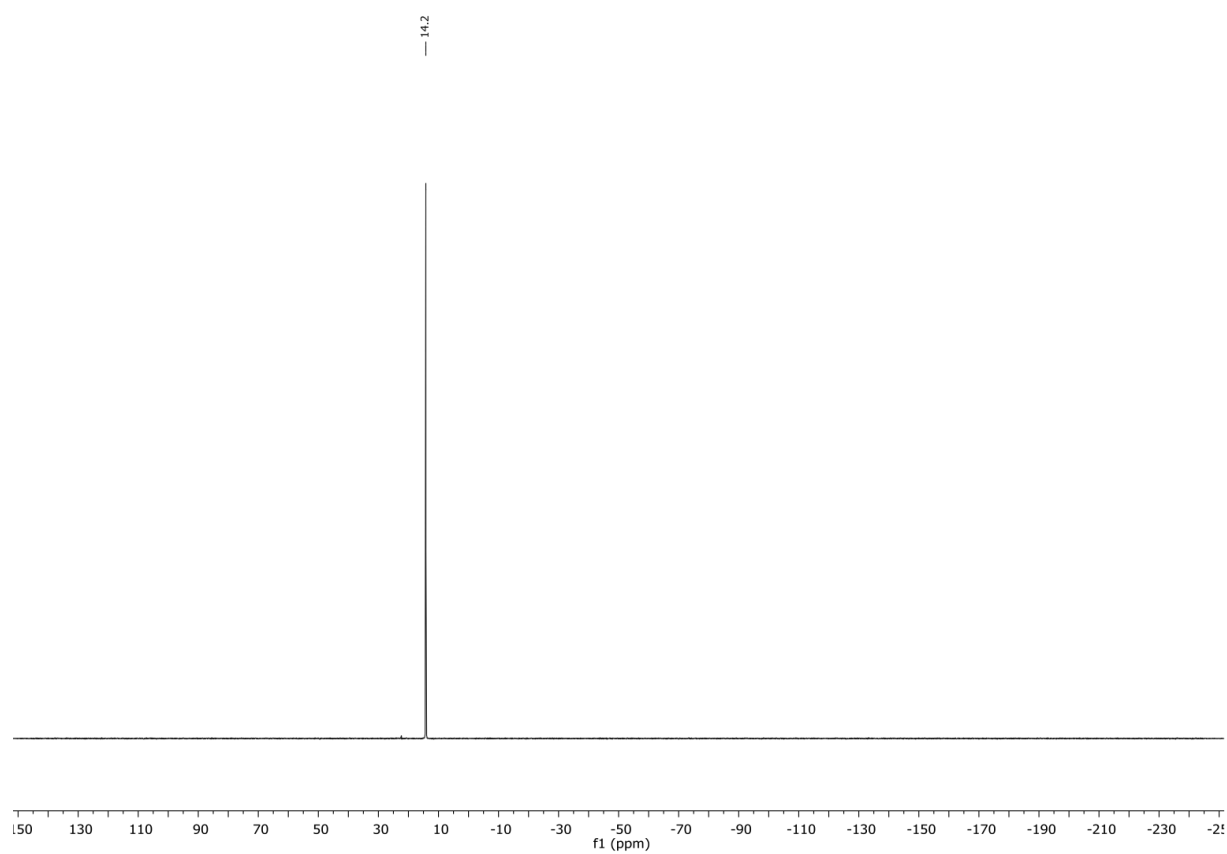

6.3.  $^1\text{H}$  and  $^{13}\text{C}$  NMR of (2*S*,3*R*)-2-(2,5-Dimethoxybenzyl)-2,3-dimethylcyclohexanone (11)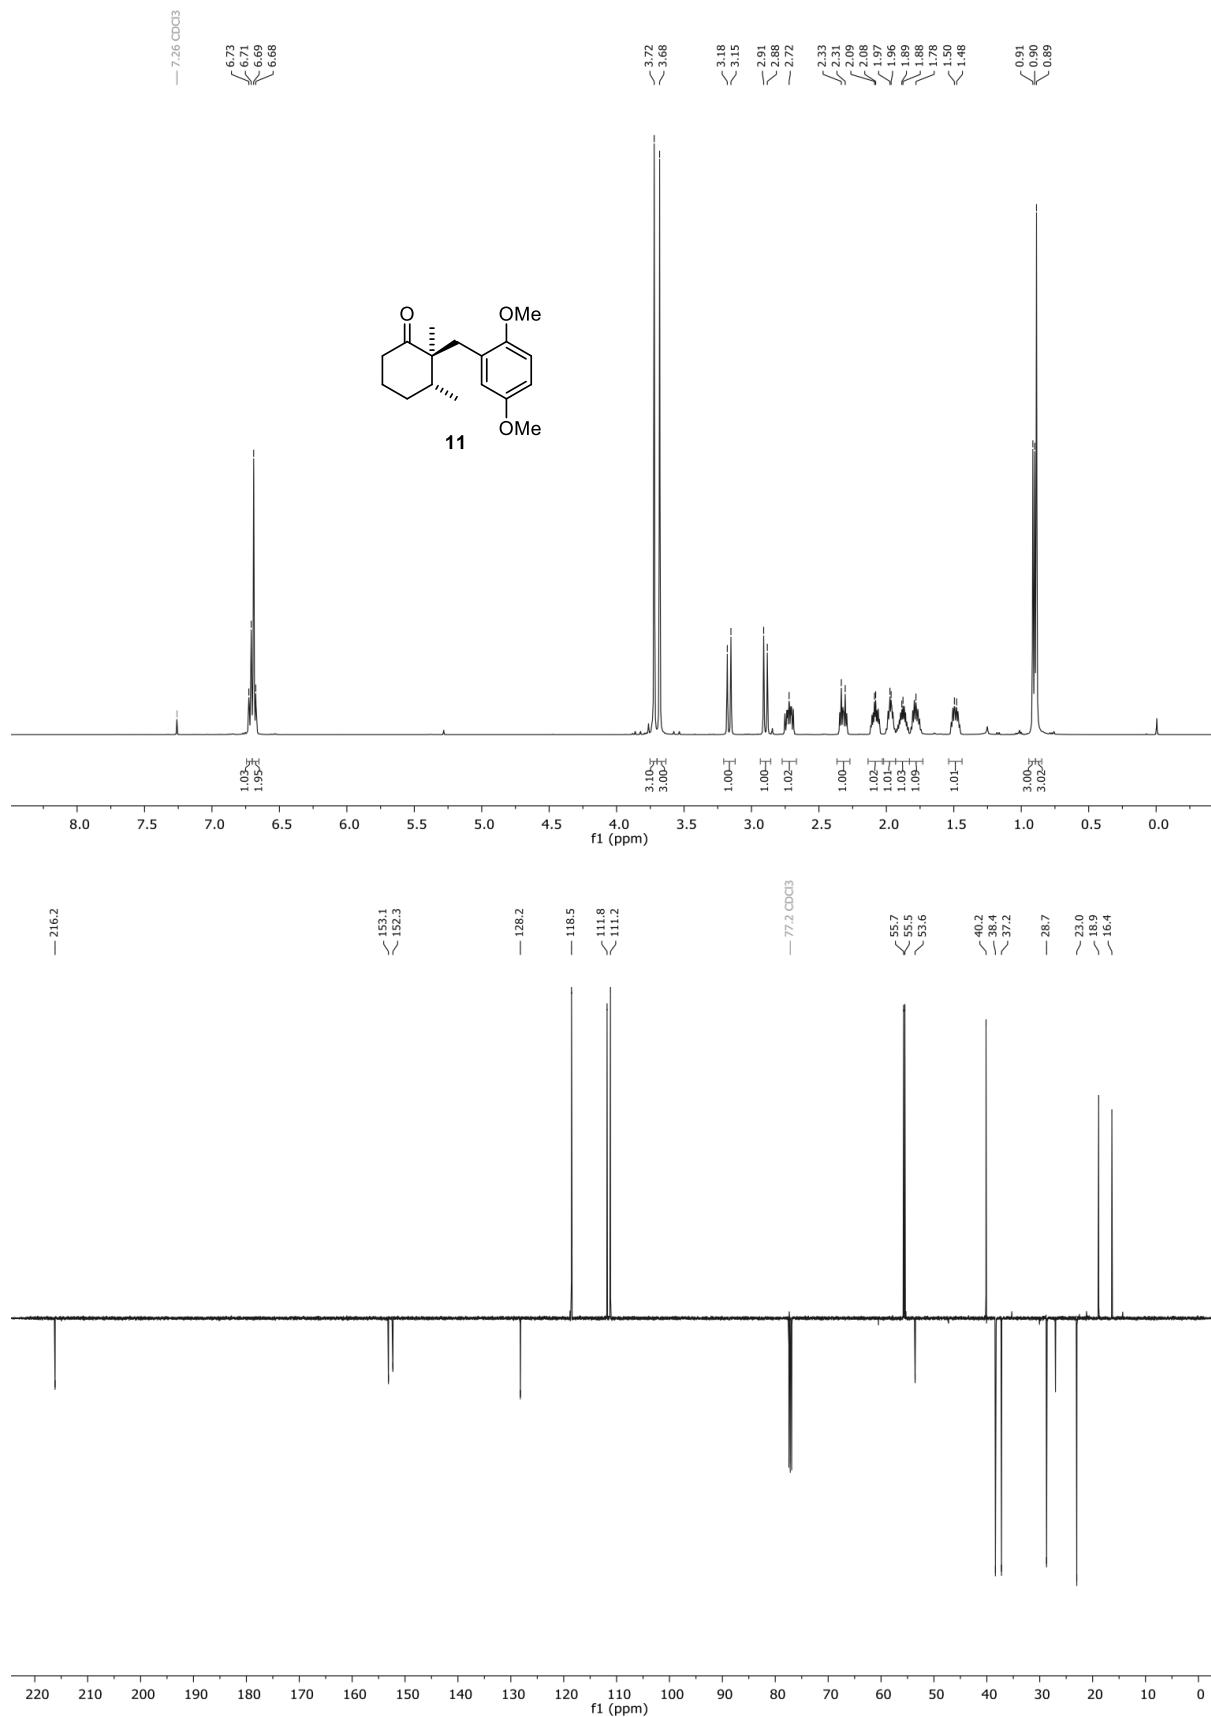

6.4.  $^1\text{H}$  and  $^{13}\text{C}$  NMR of (2*R*,3*R*)-2-(2,5-Dimethoxybenzyl)-2,3-dimethylcyclohexanone (*epi*-11)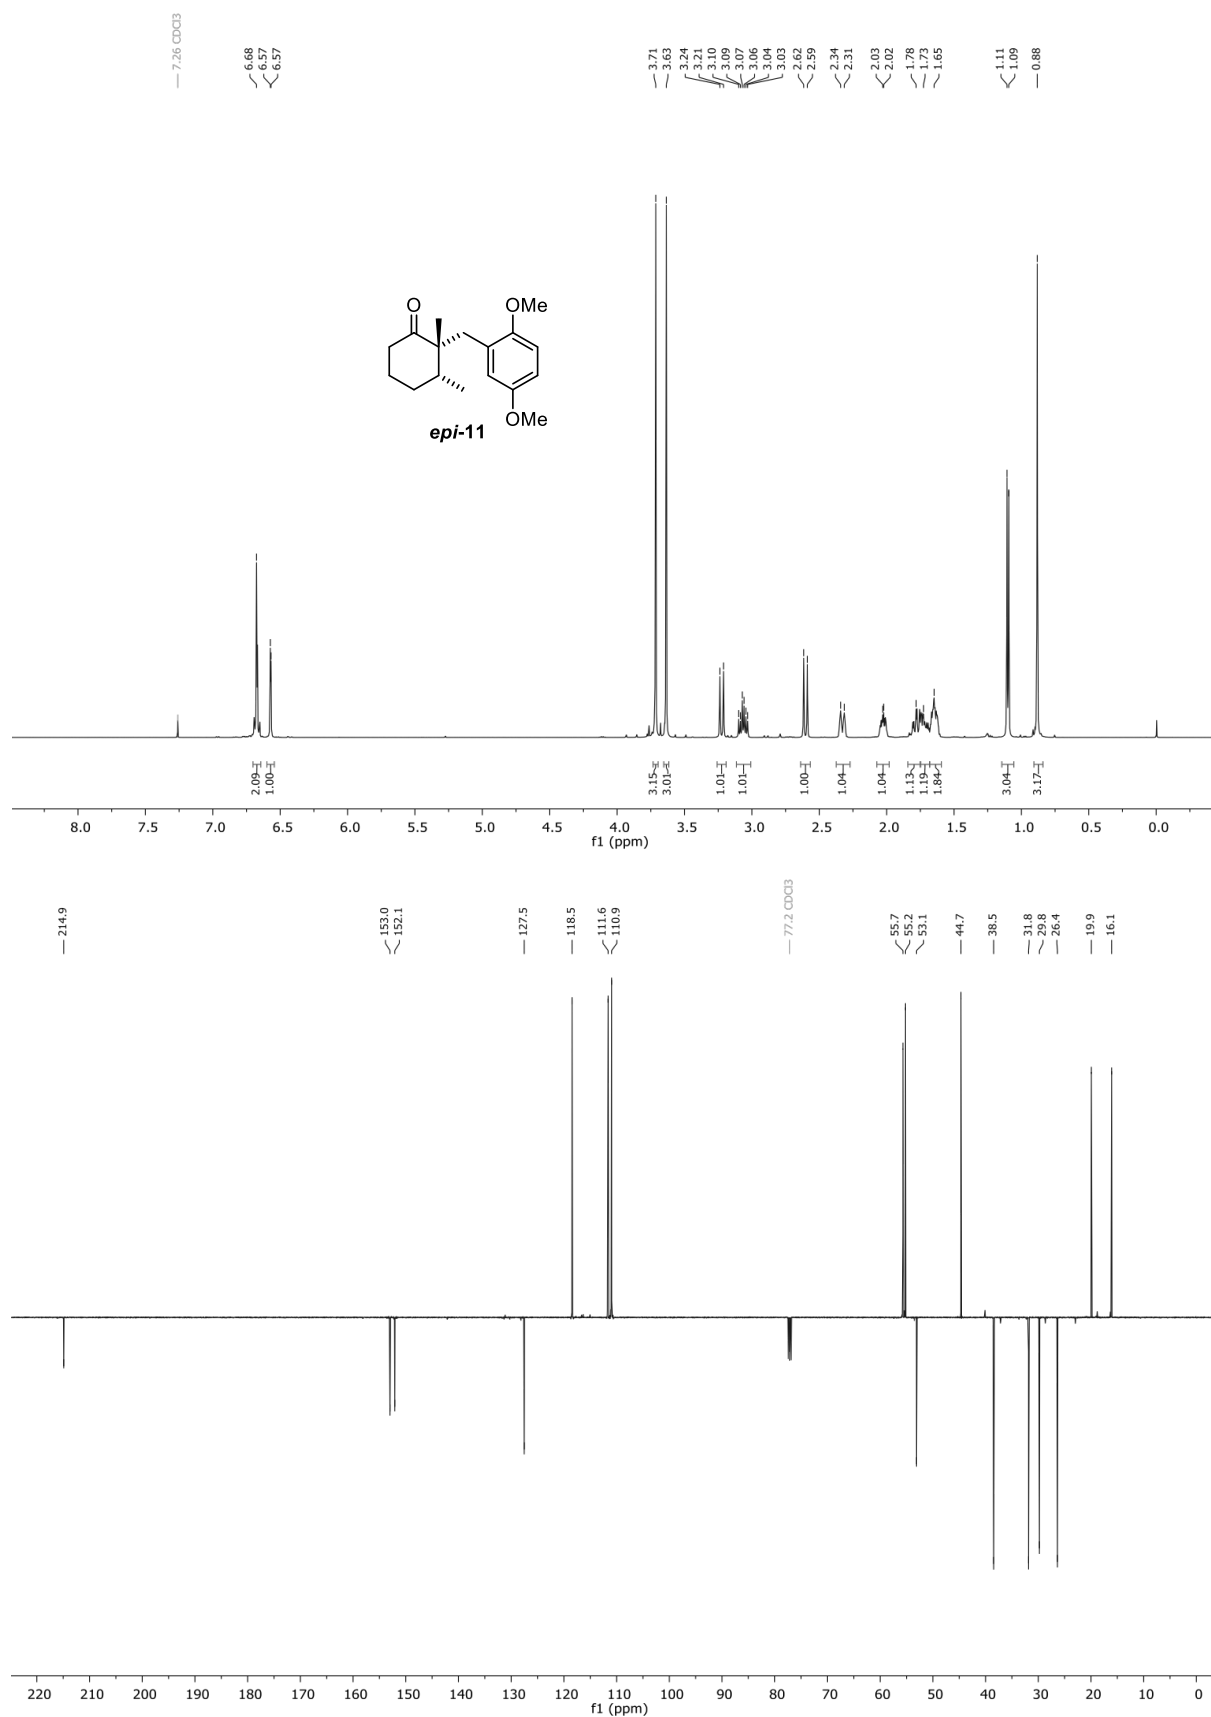

6.5.  $^1\text{H}$ ,  $^{13}\text{C}$  and  $^{19}\text{F}$  NMR of Enol Triflate **14**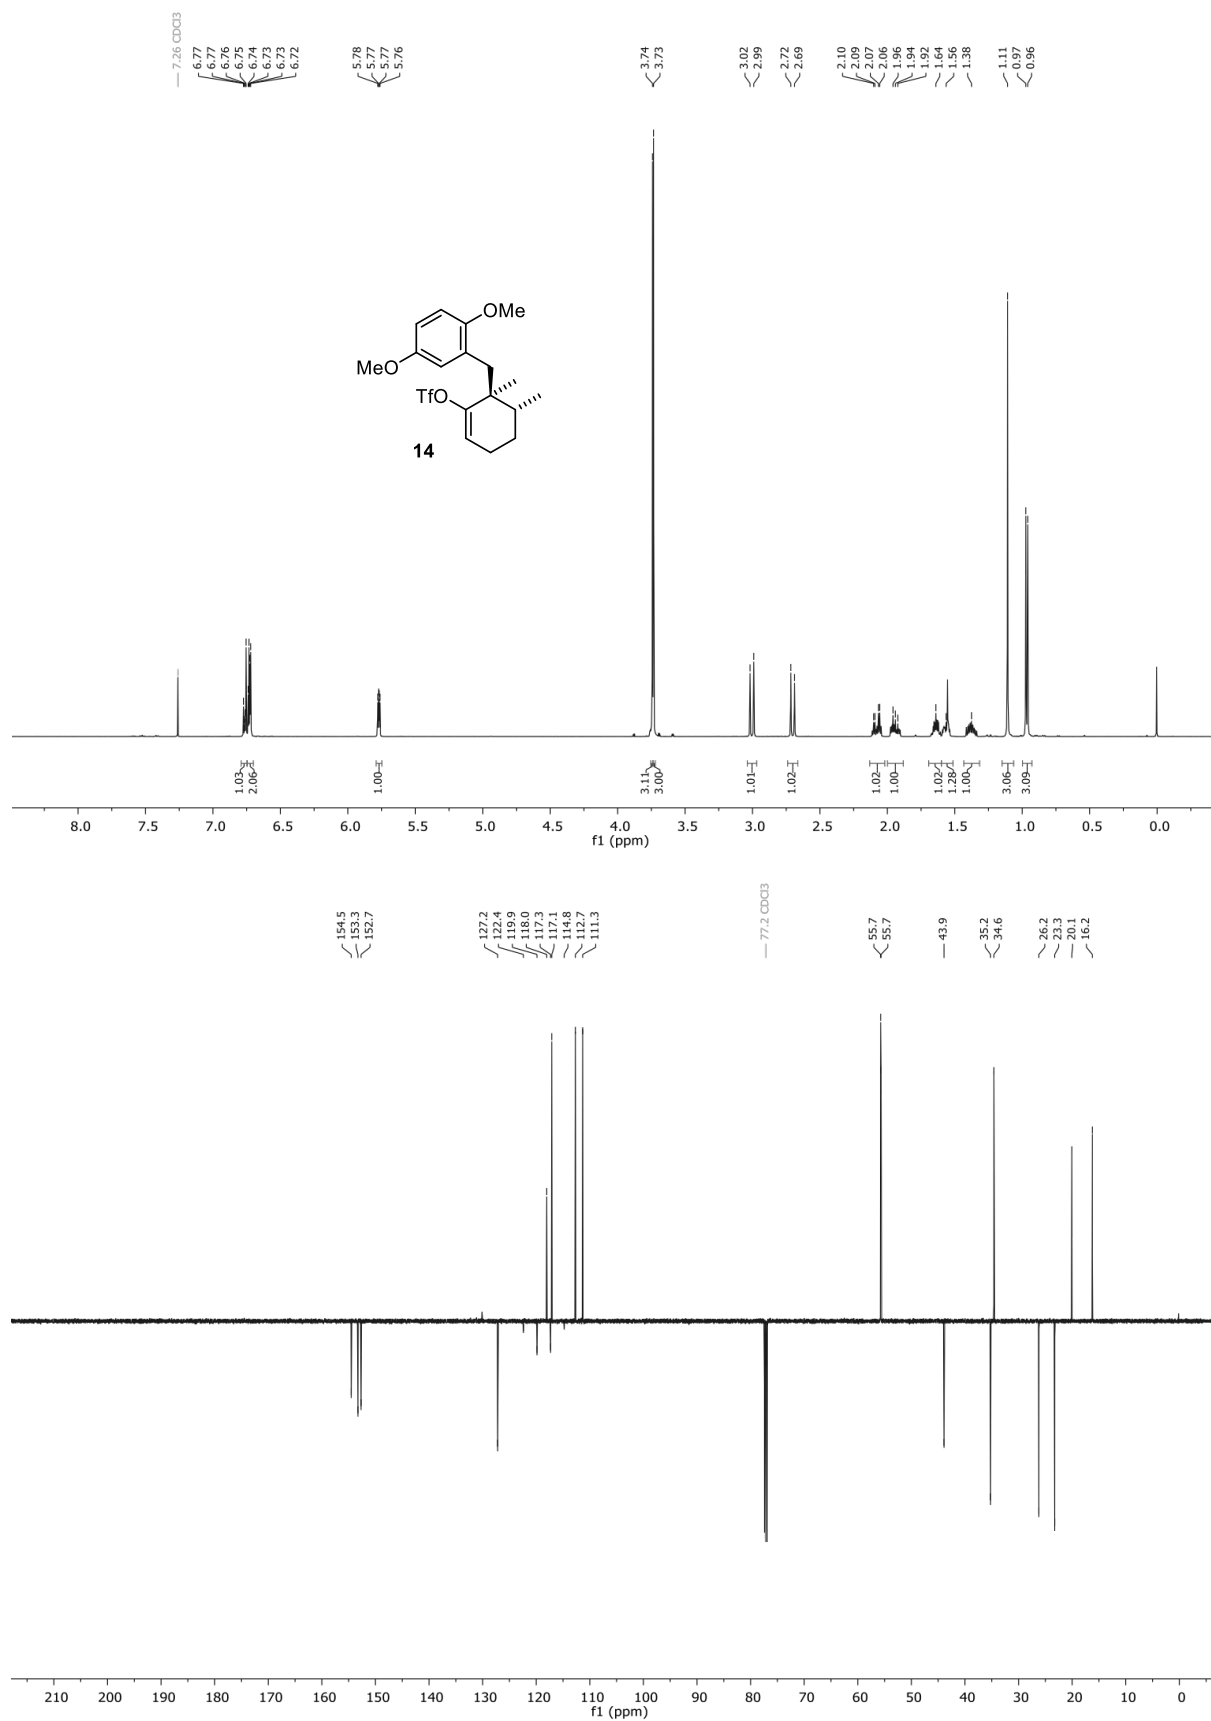

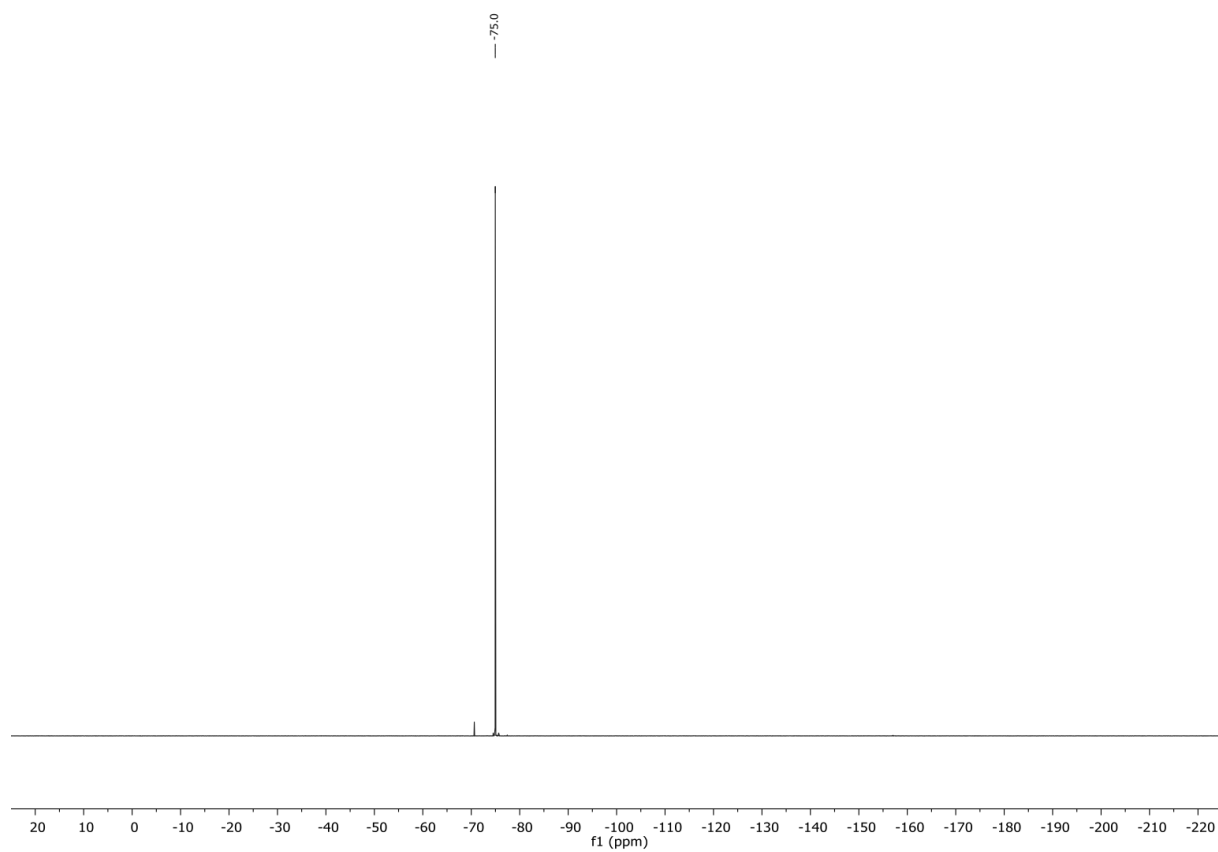

6.6.  $^1\text{H}$  and  $^{13}\text{C}$  NMR of But-3-en-1-yloxy(*tert*-butyl)dimethylsilane (15)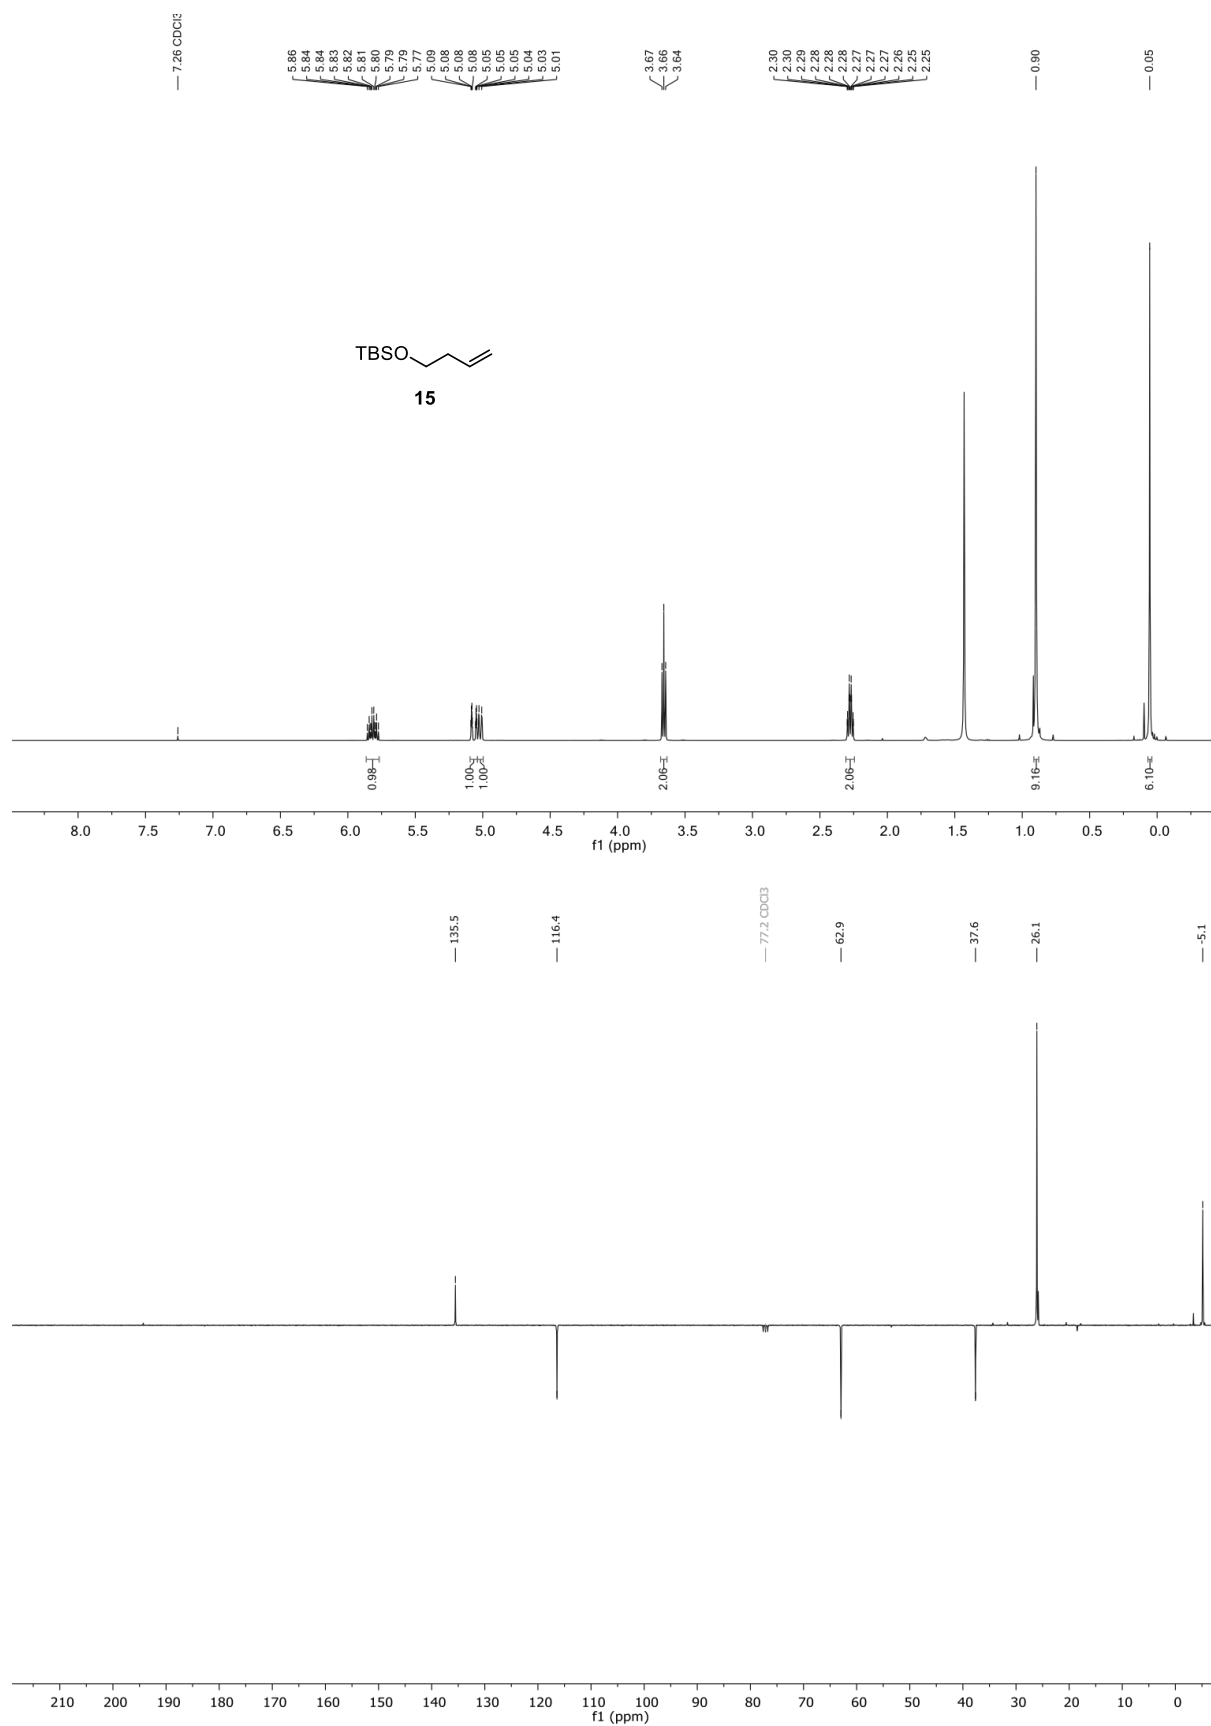

6.7.  $^1\text{H}$  and  $^{13}\text{C}$  NMR of Silyl Ether 16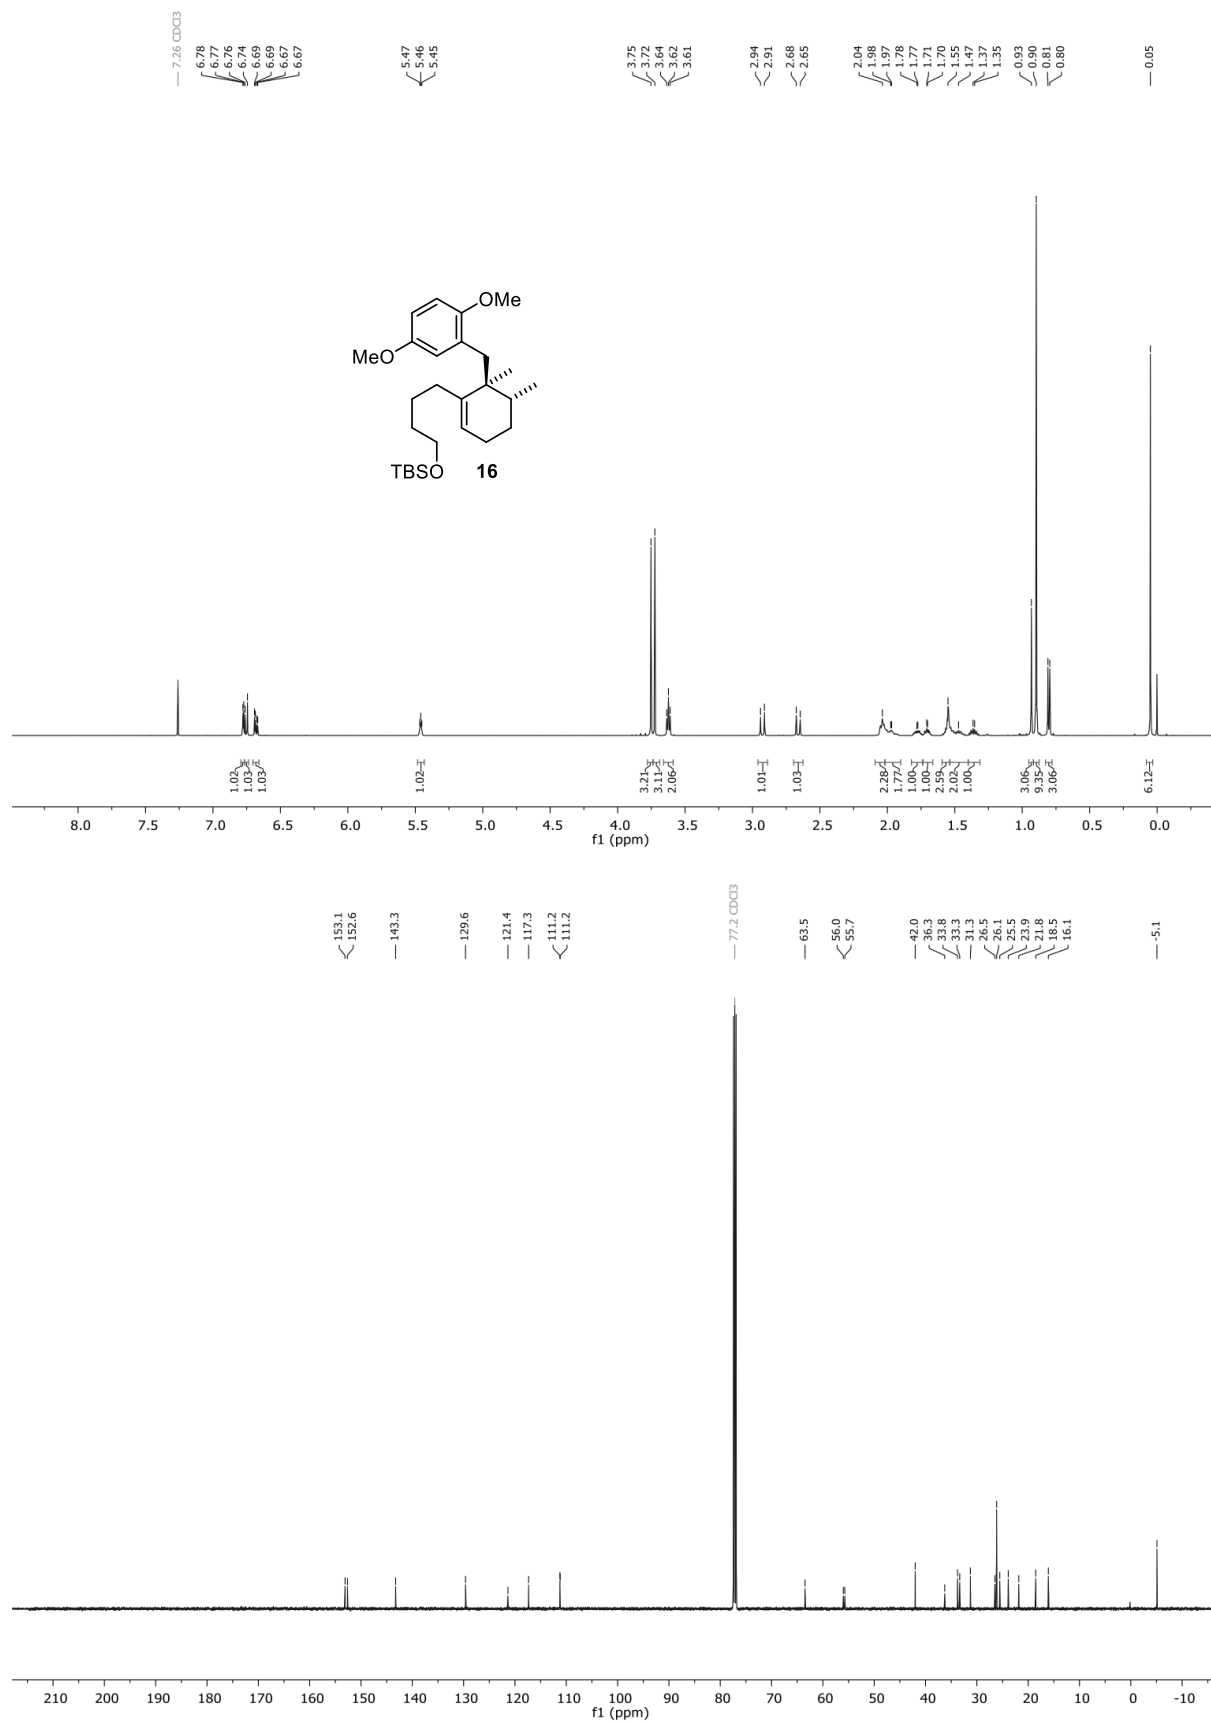



6.8.  $^1\text{H}$  and  $^{13}\text{C}$  NMR of Alcohol SI3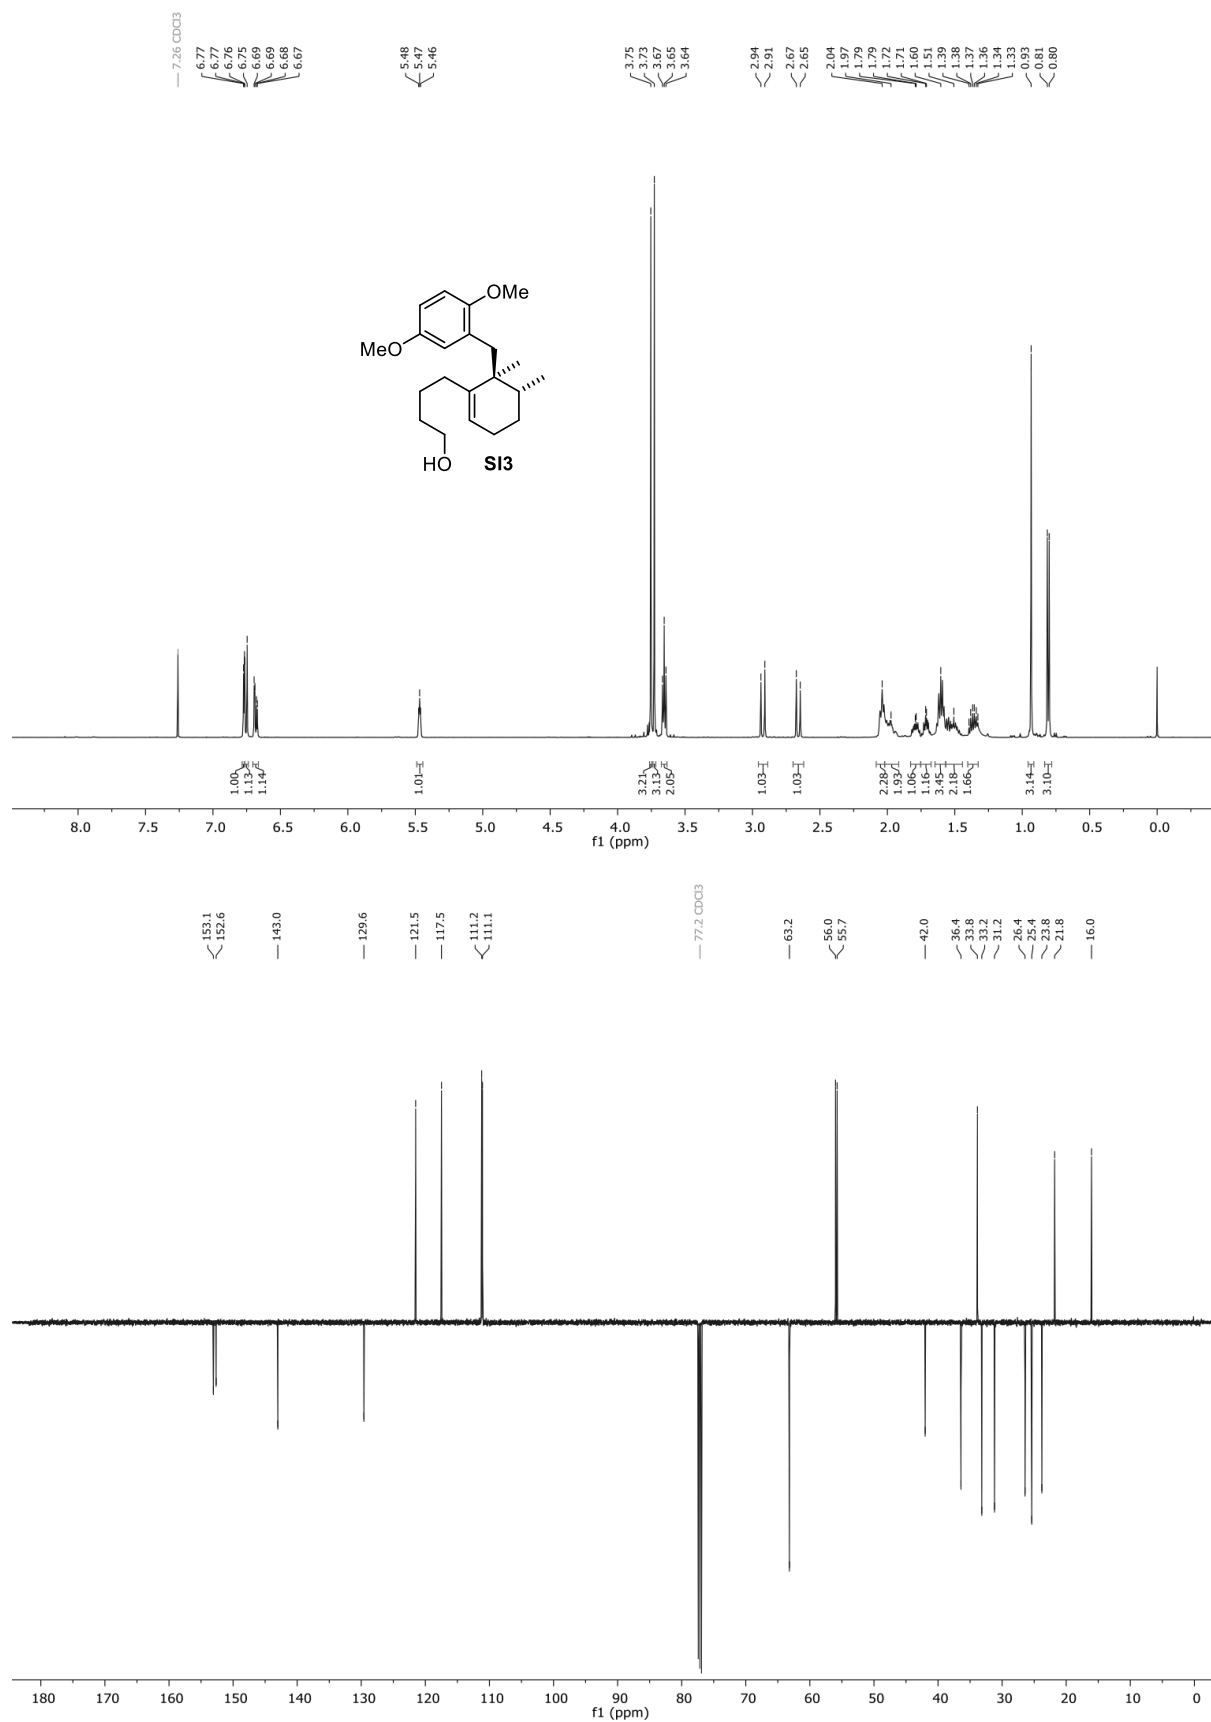

6.9.  $^1\text{H}$  and  $^{13}\text{C}$  NMR of Aldehyde 10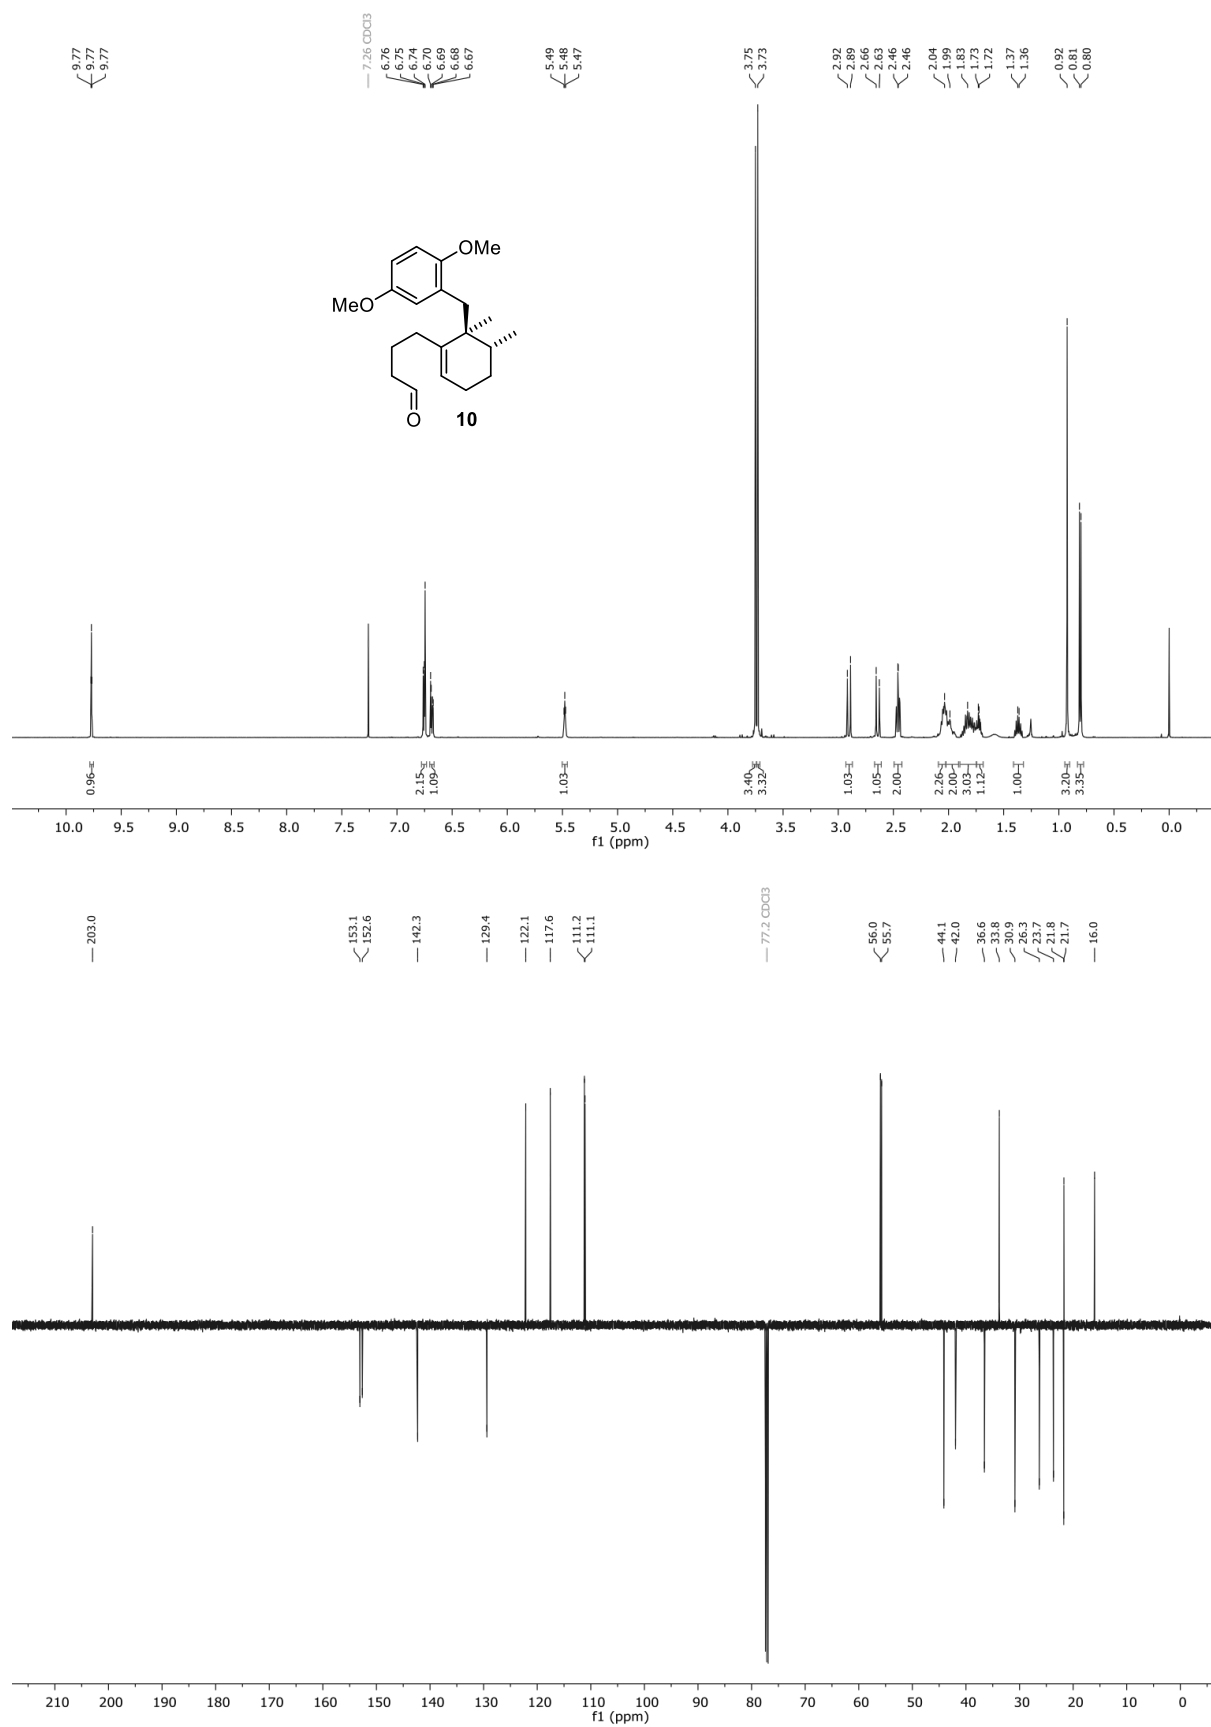

6.10.  $^1\text{H}$  and  $^{13}\text{C}$  NMR of Olefin 17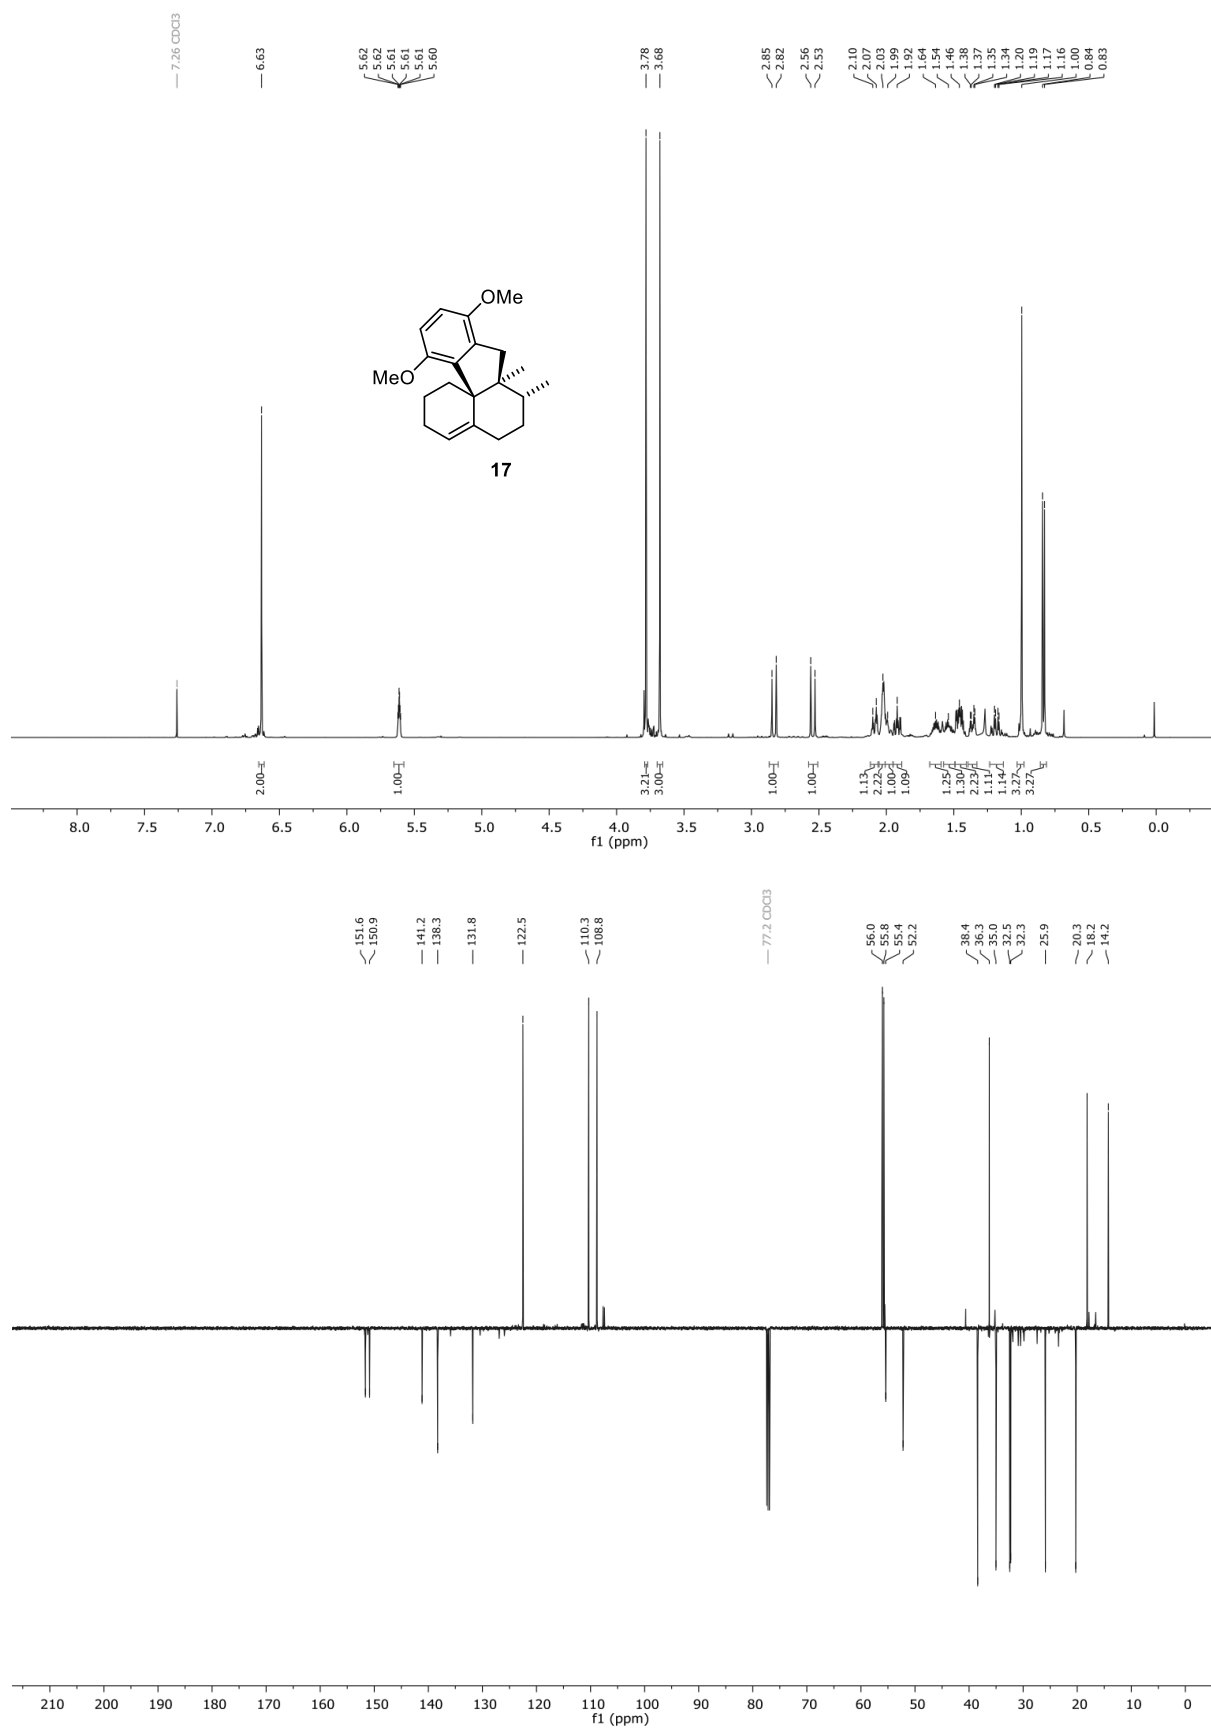

6.11.  $^1\text{H}$  and  $^{13}\text{C}$  NMR of Ketone 22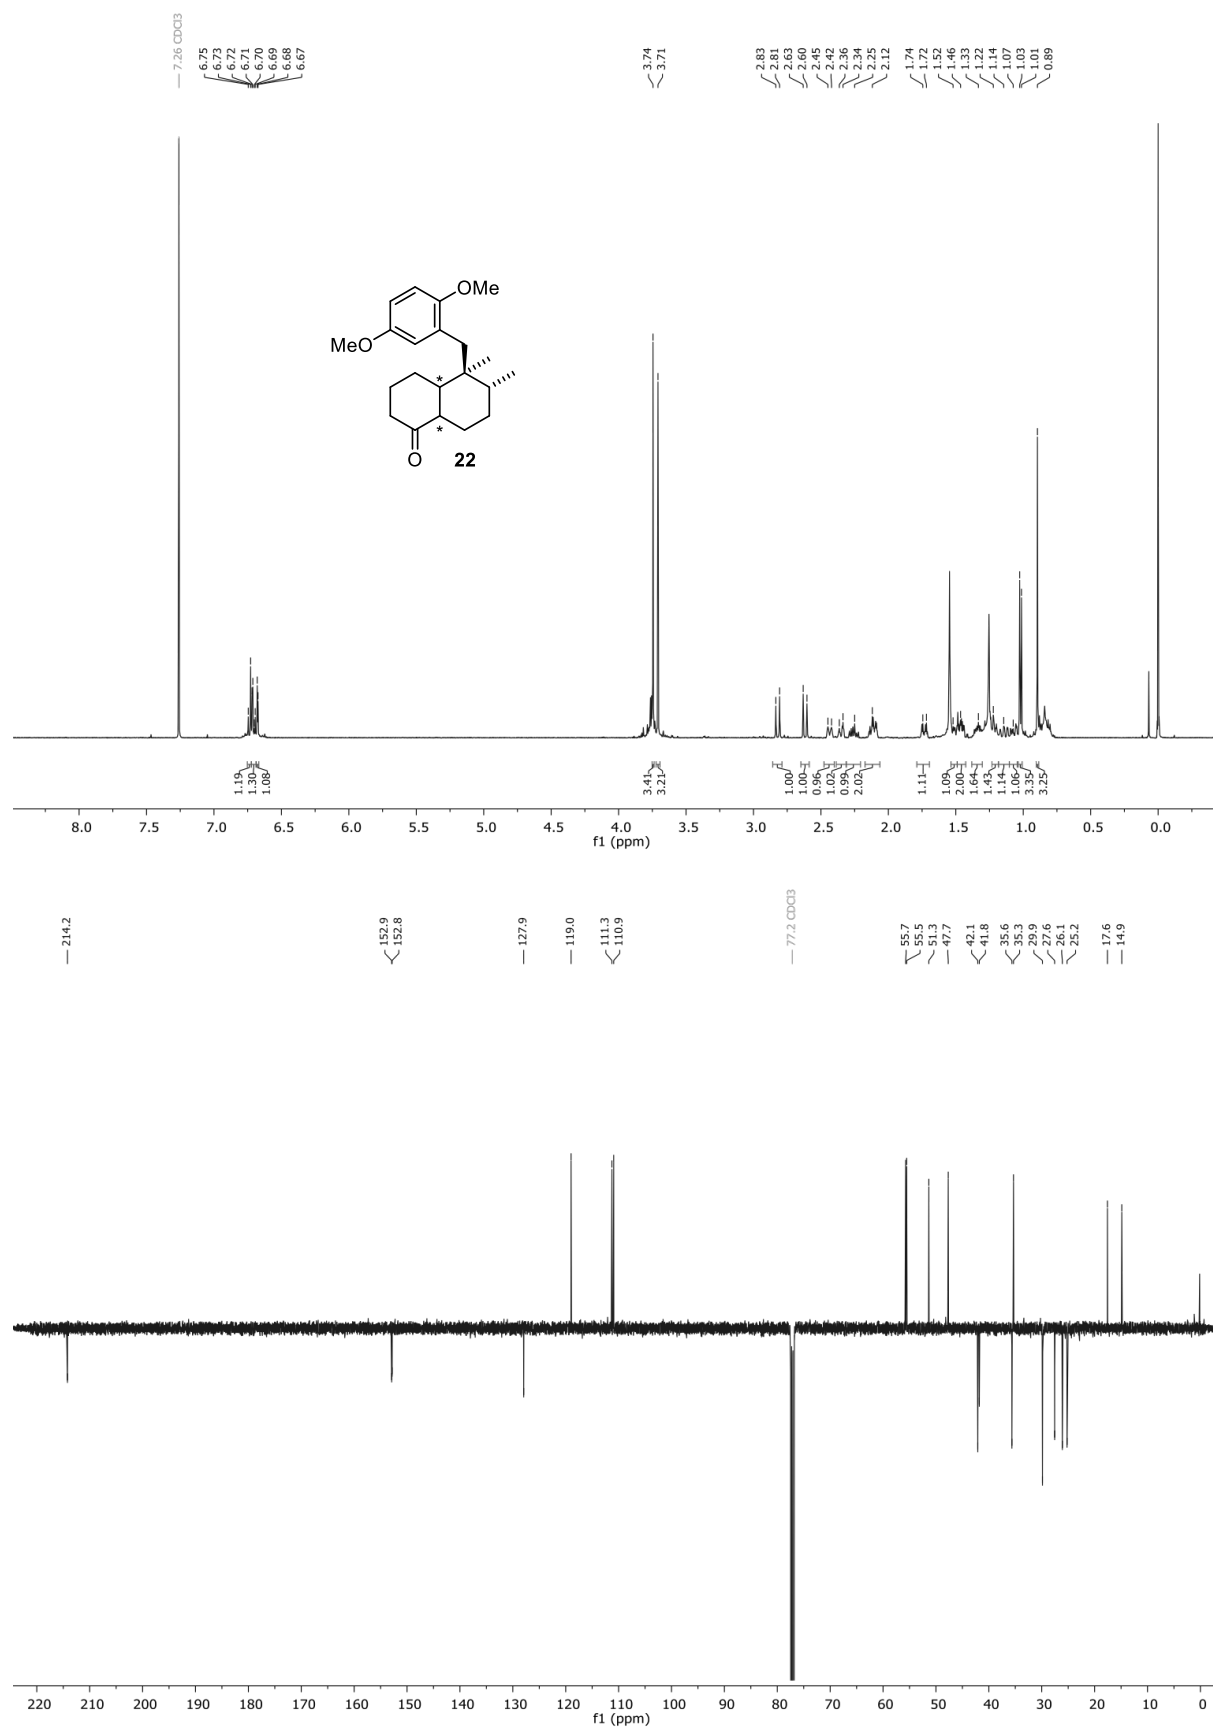

6.12.  $^1\text{H}$  and  $^{13}\text{C}$  NMR of Alcohol SI4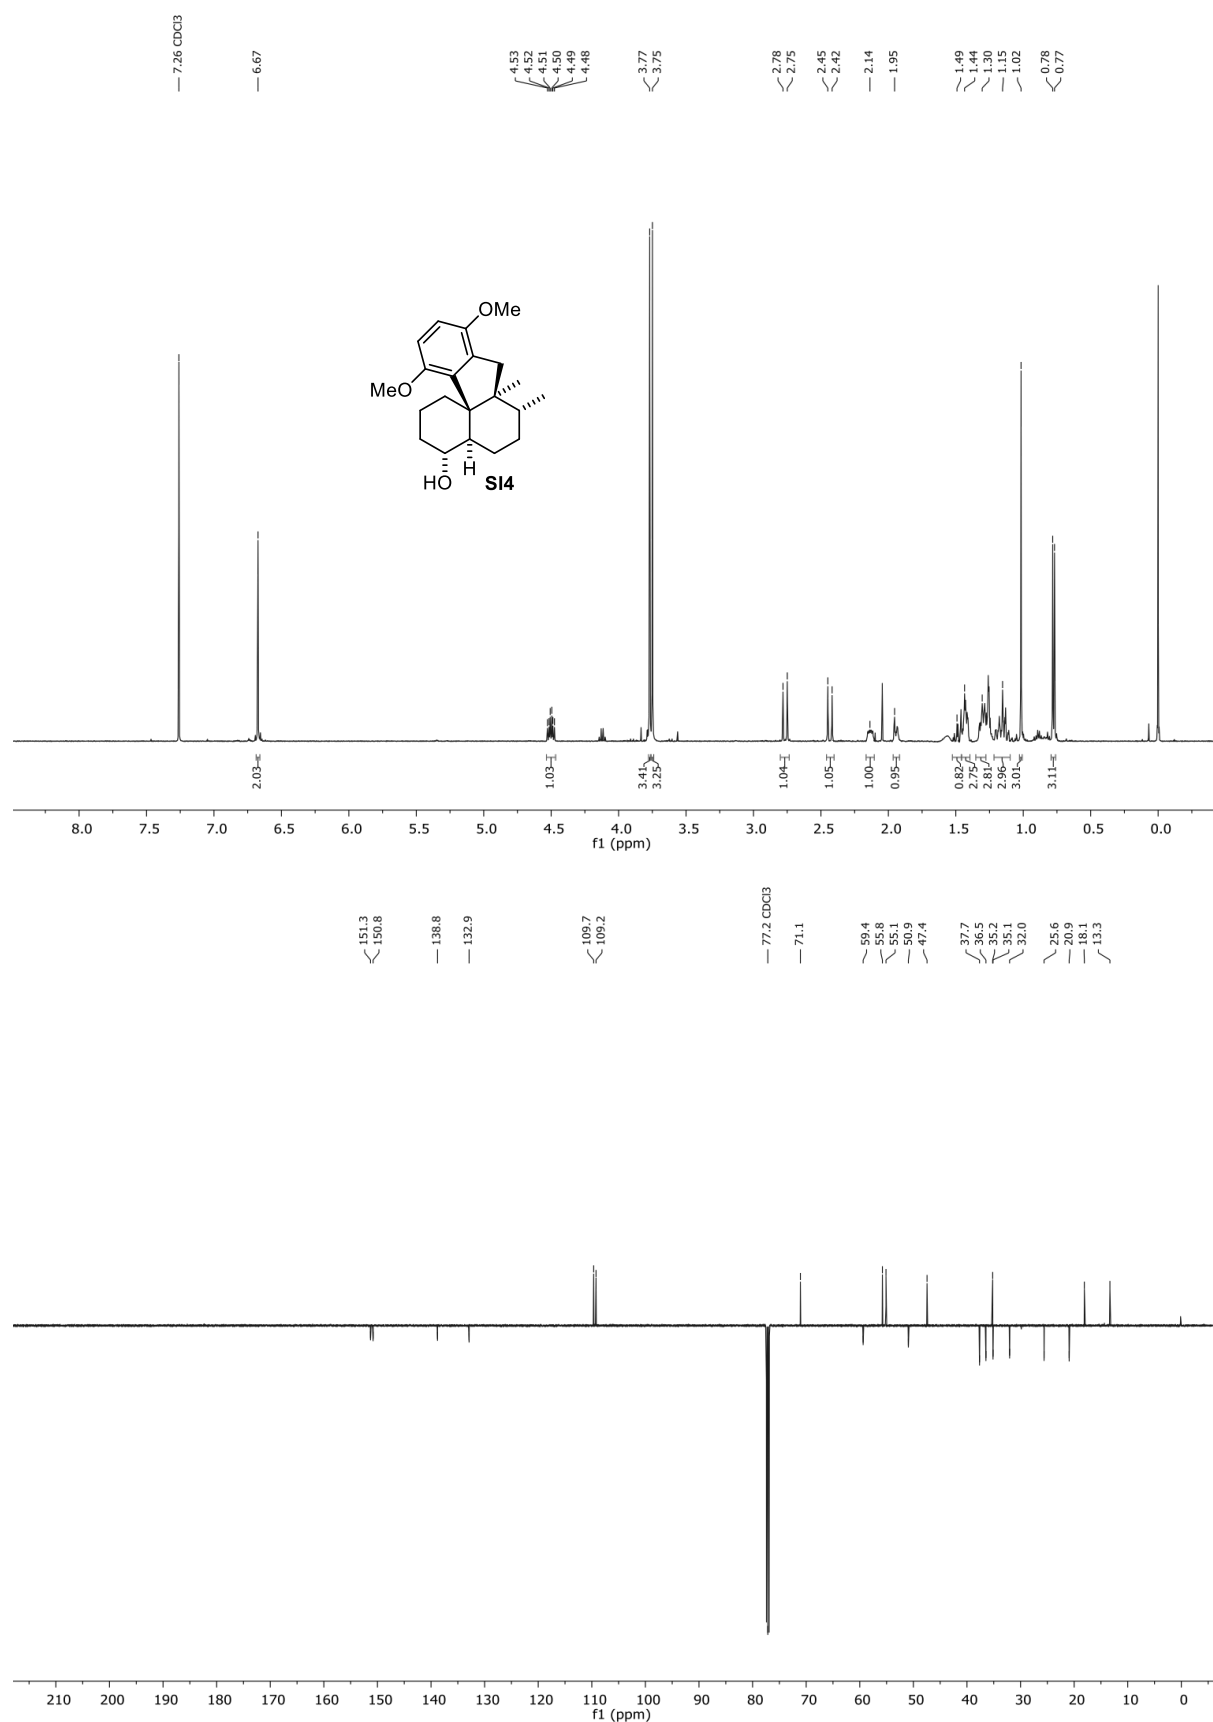

6.13.  $^1\text{H}$  and  $^{13}\text{C}$  NMR of Ketone **9**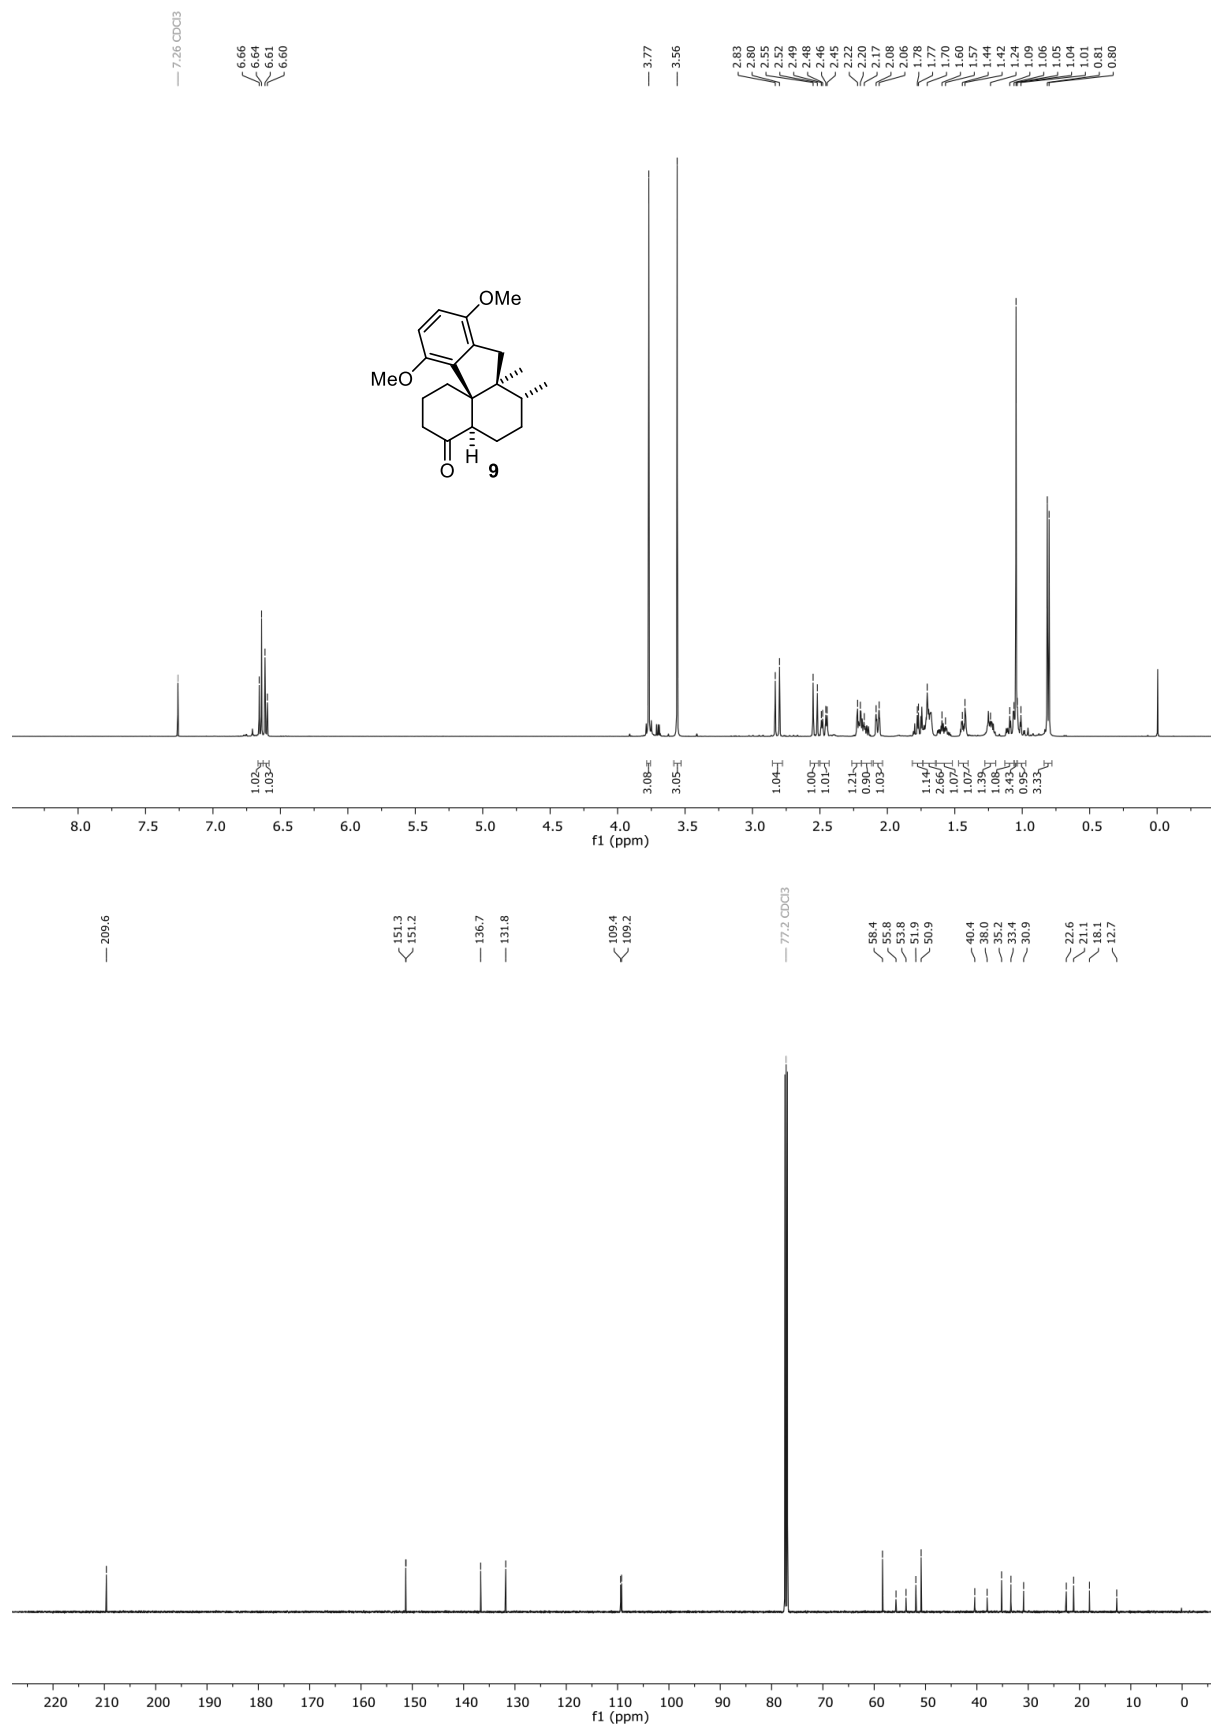

6.14.  $^1\text{H}$  and  $^{13}\text{C}$  NMR of Alcohol 26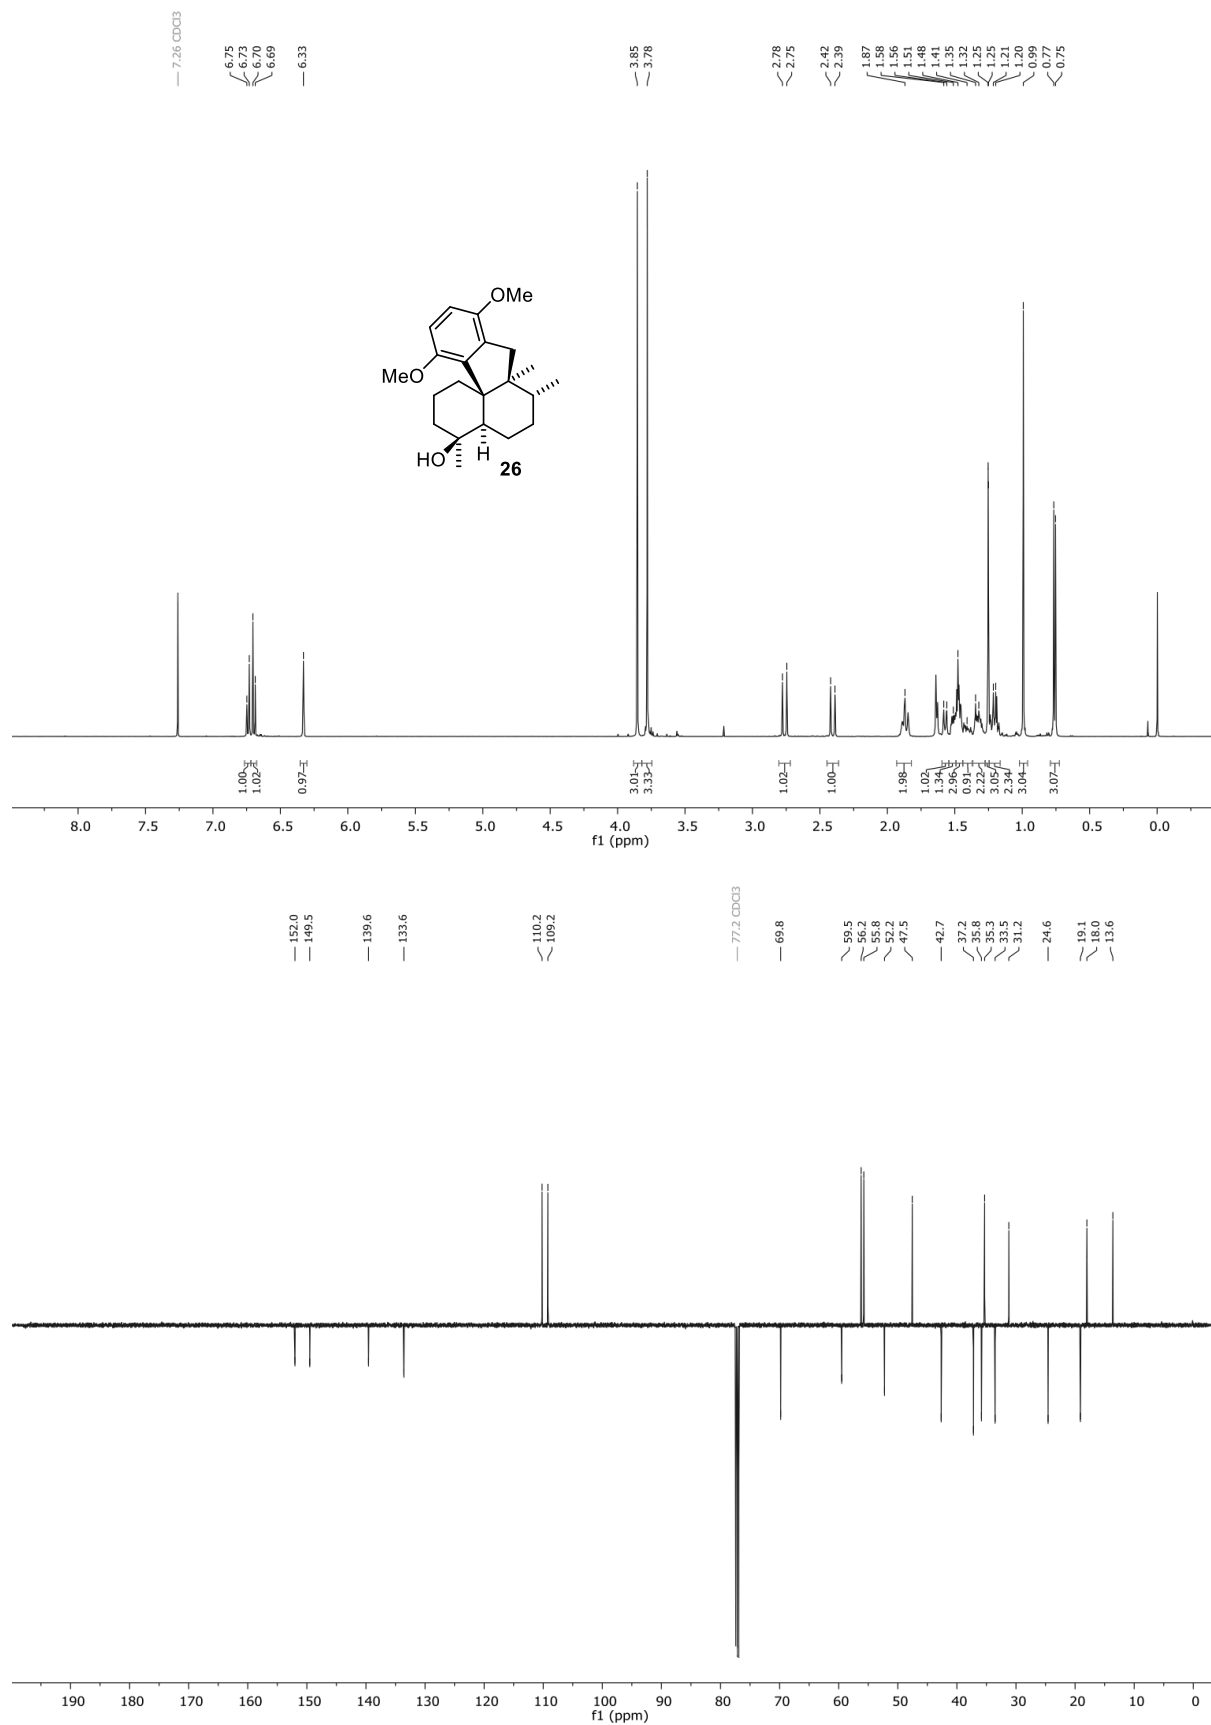

6.15.  $^1\text{H}$  and  $^{13}\text{C}$  NMR of Olefin 29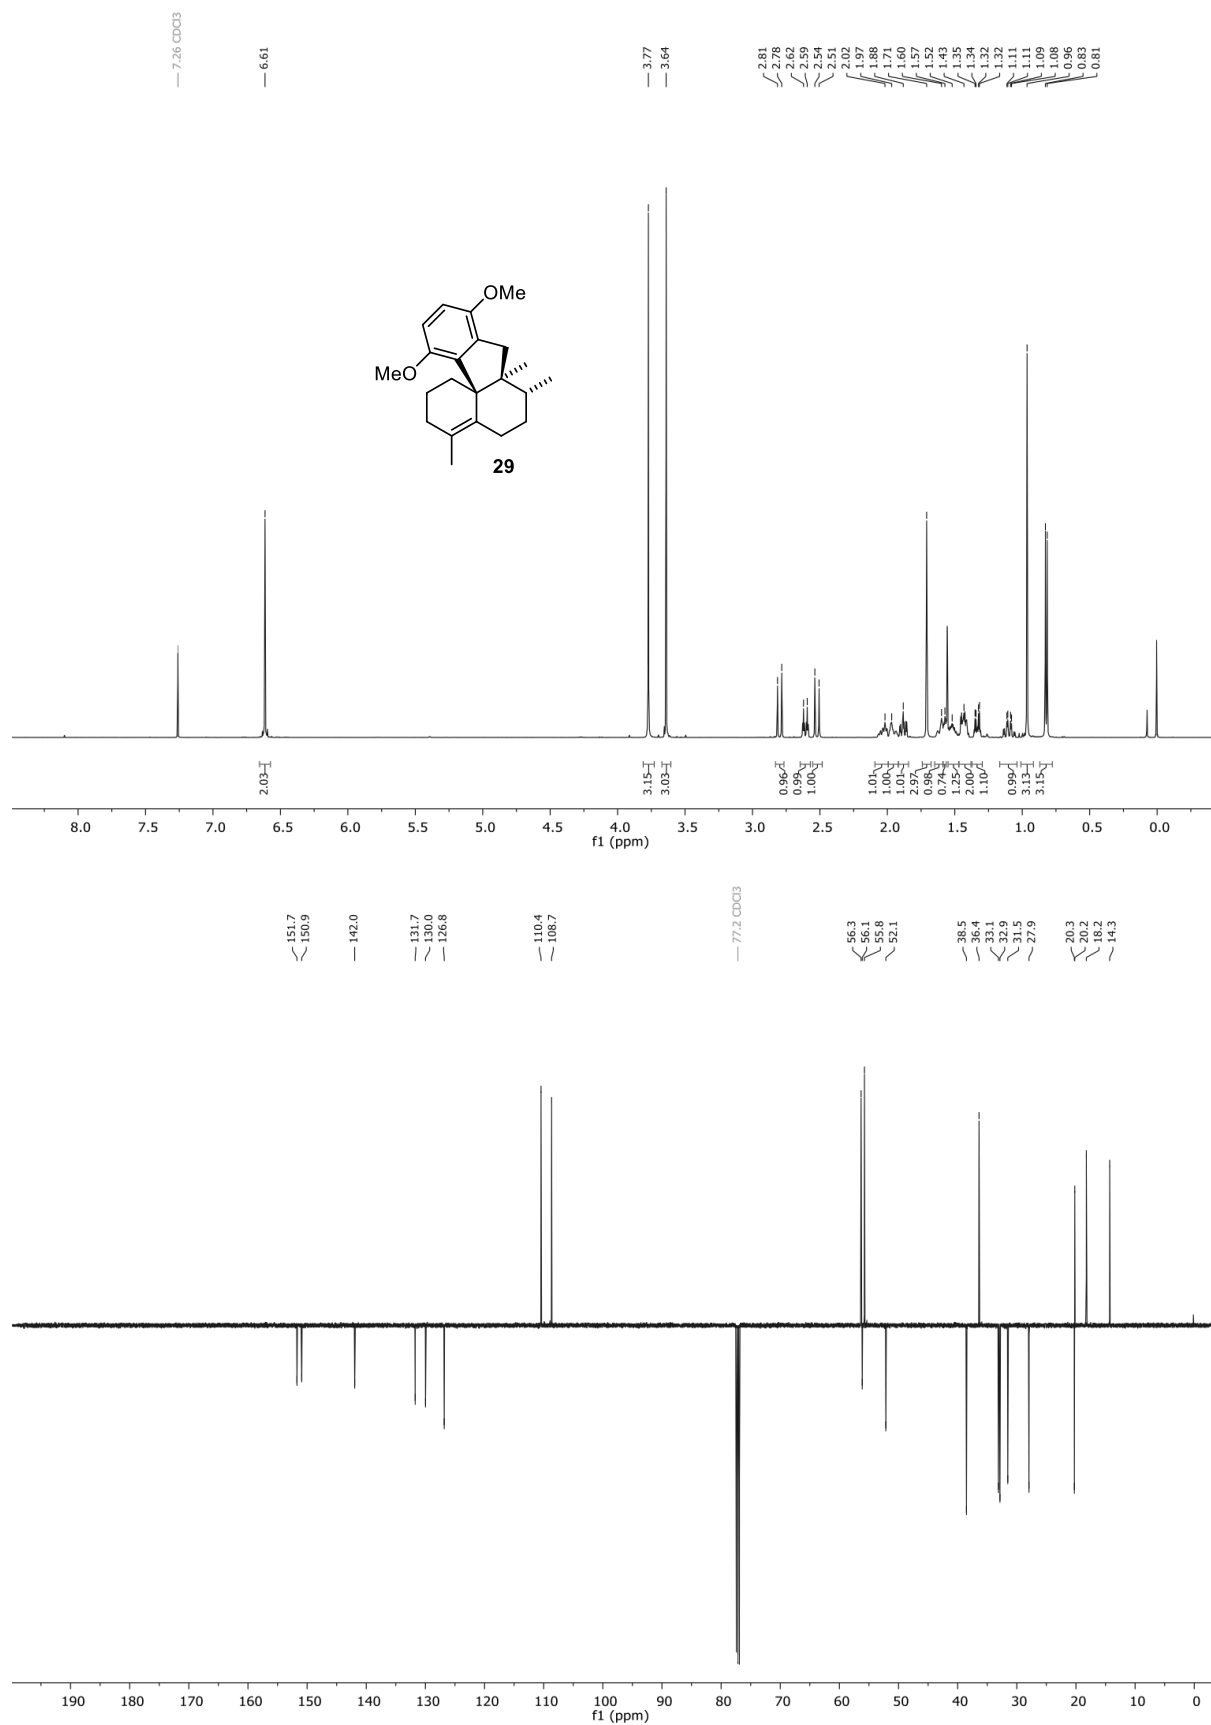



6.16.  $^1\text{H}$  and  $^{13}\text{C}$  NMR of Cyclopropane 30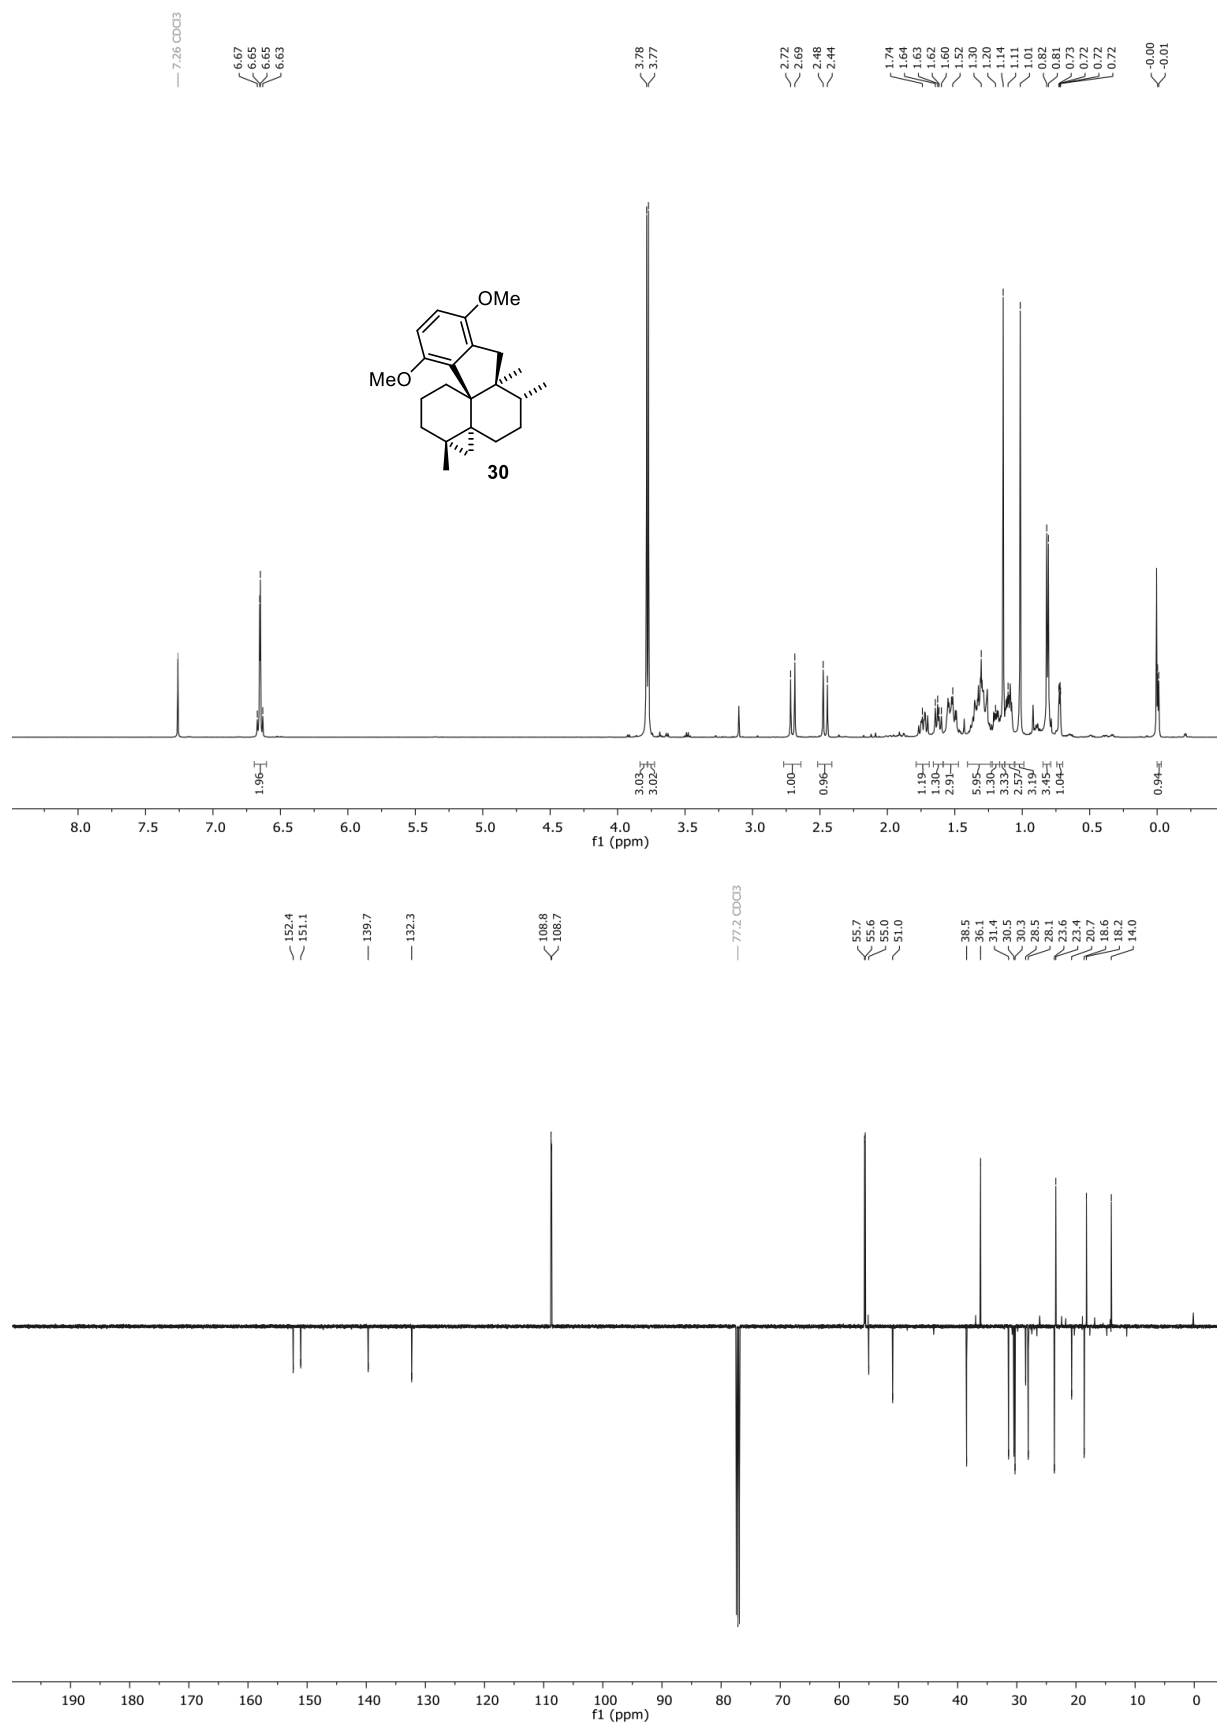

6.17.  $^1\text{H}$  (full view and zoom in) and  $^{13}\text{C}$  NMR of (-)-dysiherbol A (31)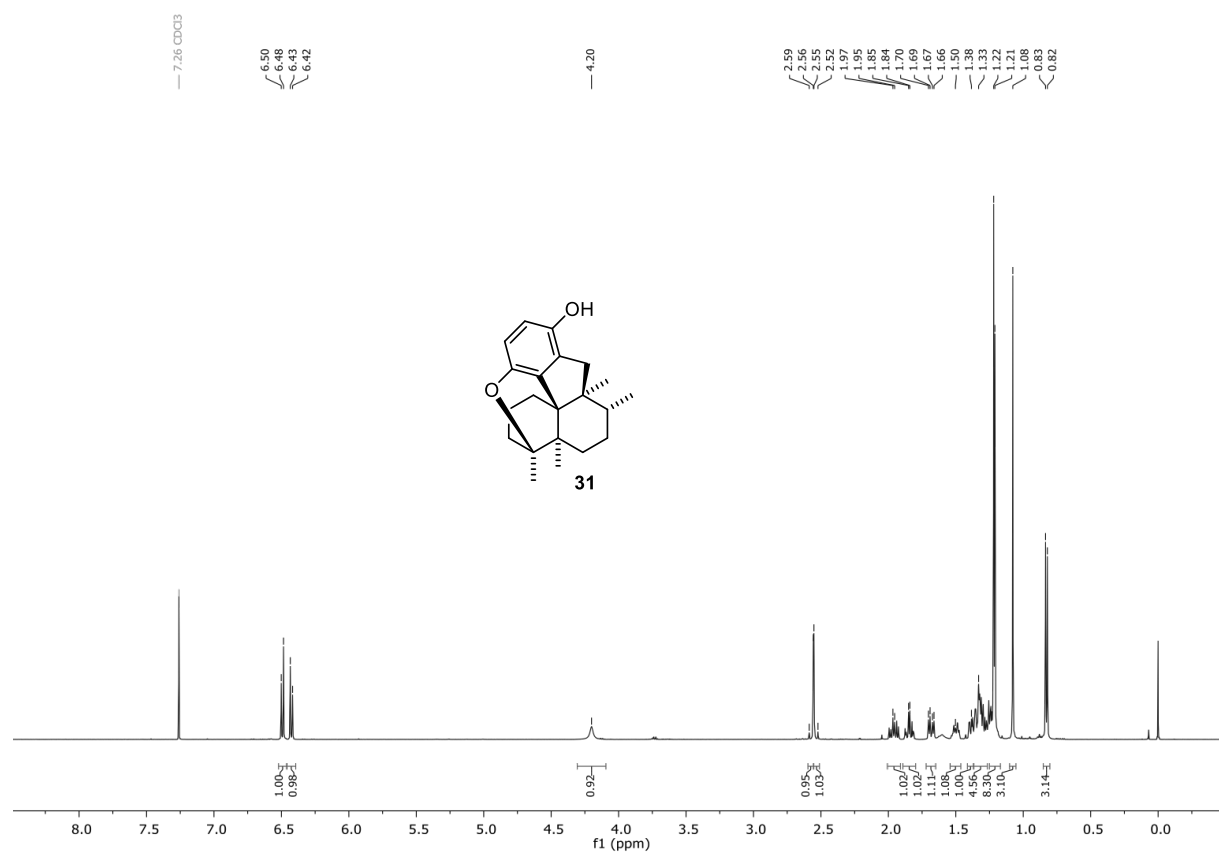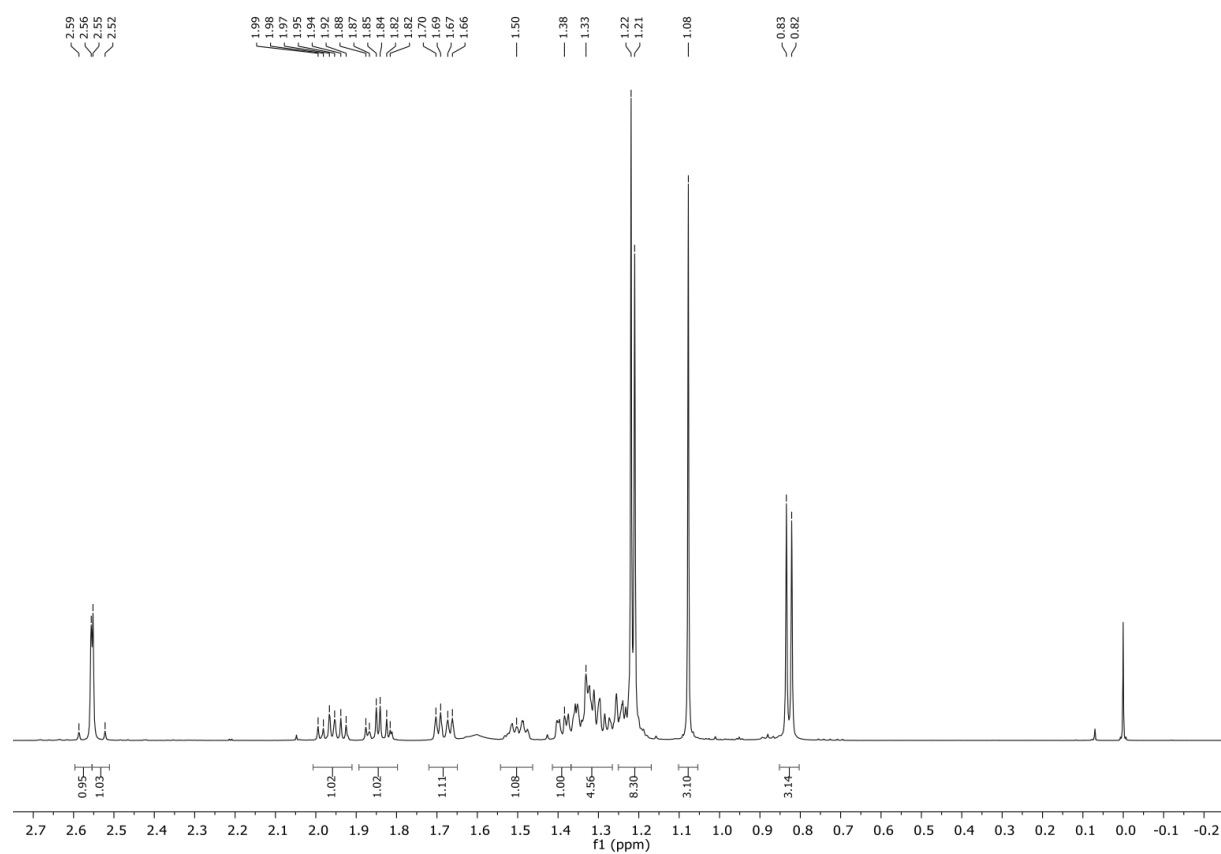

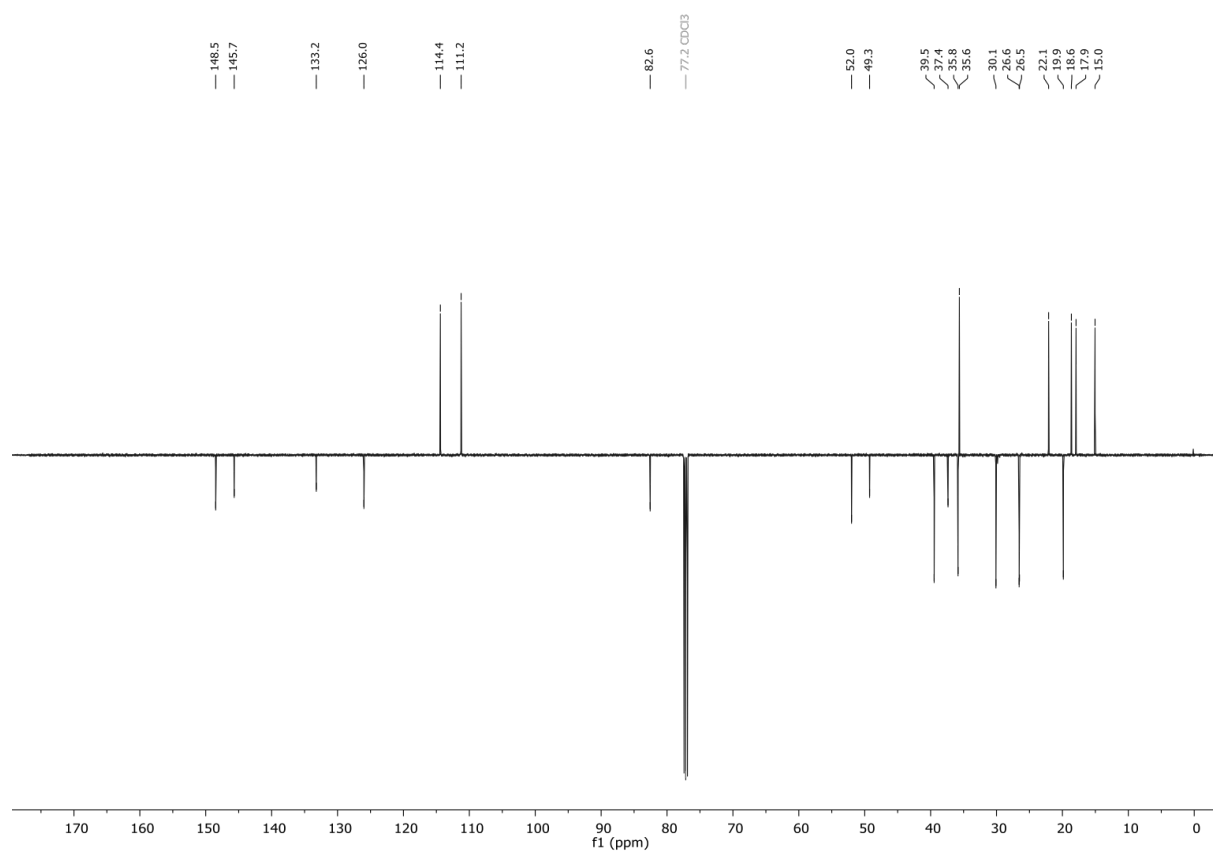

6.18.  $^1\text{H}$  and  $^{13}\text{C}$  NMR of Quinone SI5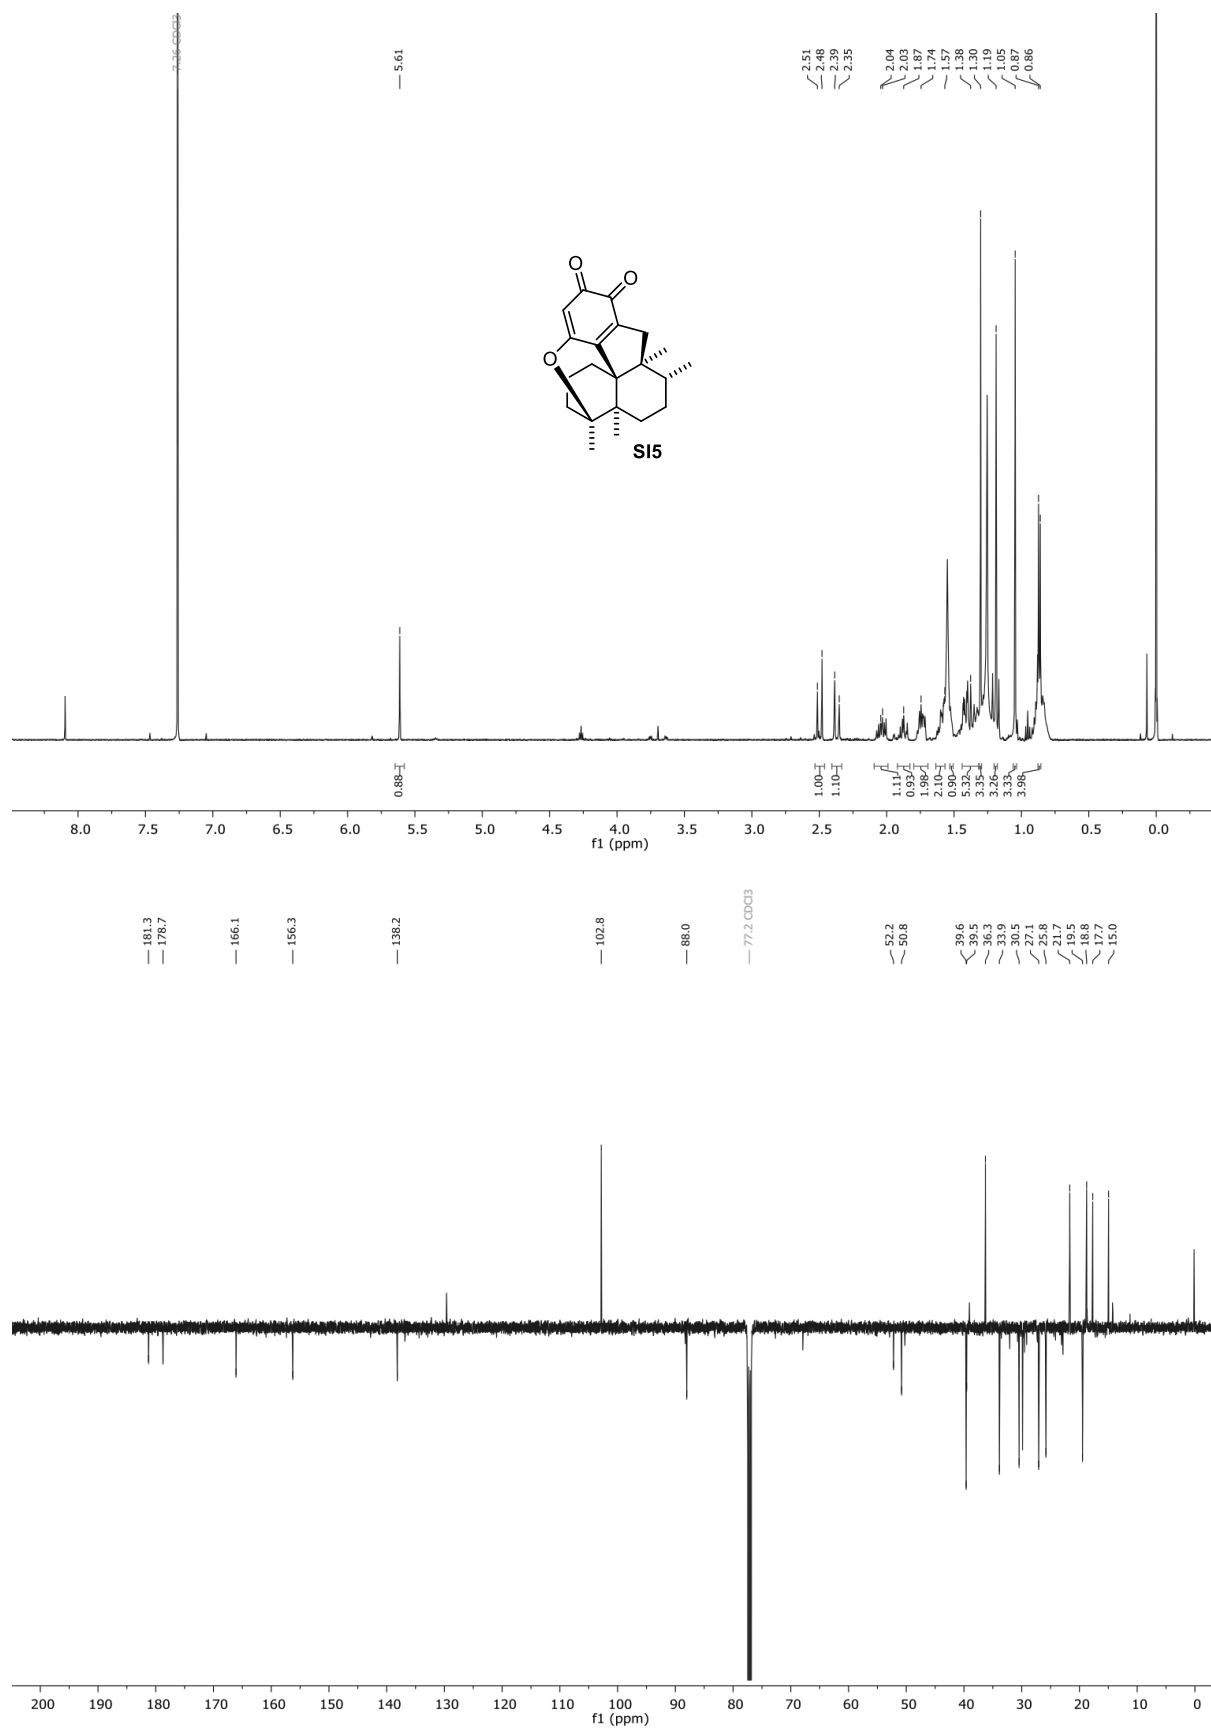

6.19.  $^1\text{H}$  and  $^{13}\text{C}$  NMR of Triol 27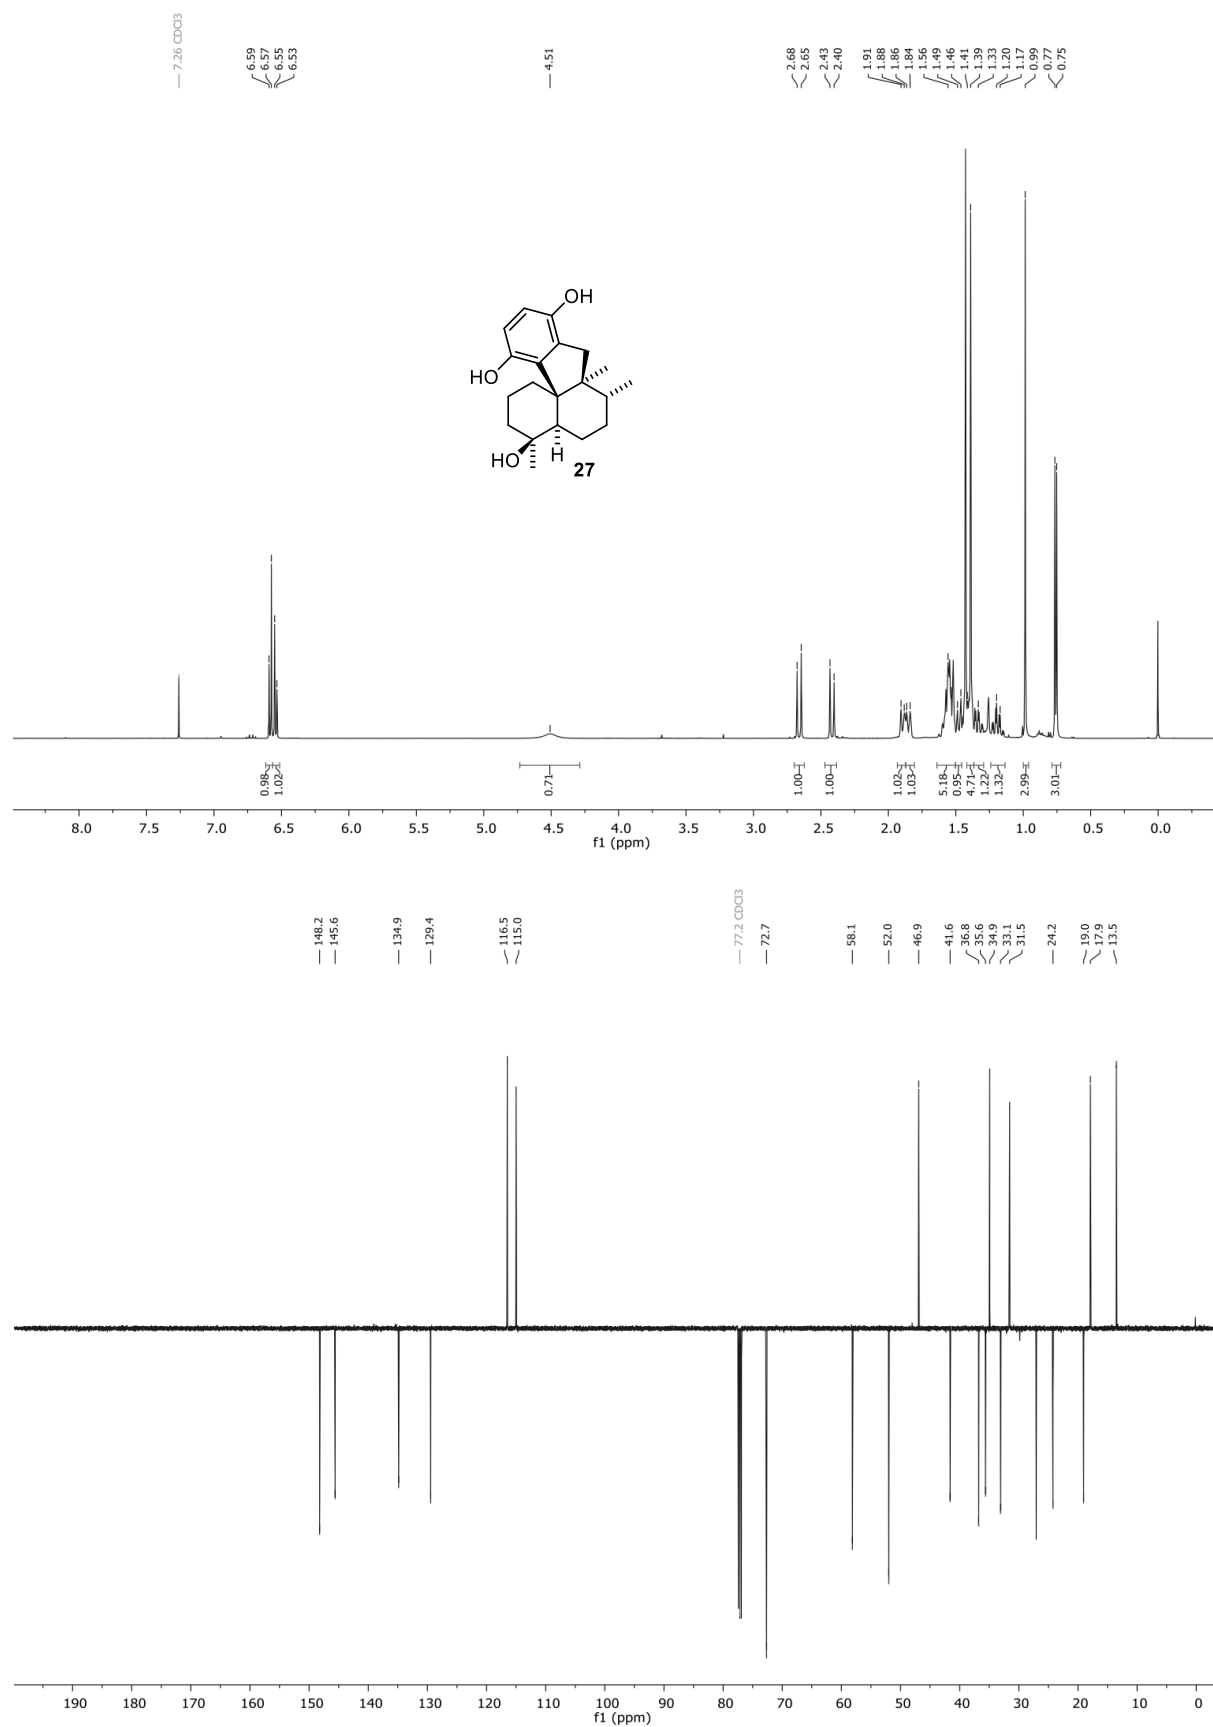

6.20.  $^1\text{H}$  and  $^{13}\text{C}$  NMR of nor-(–)-dysiherbol A 28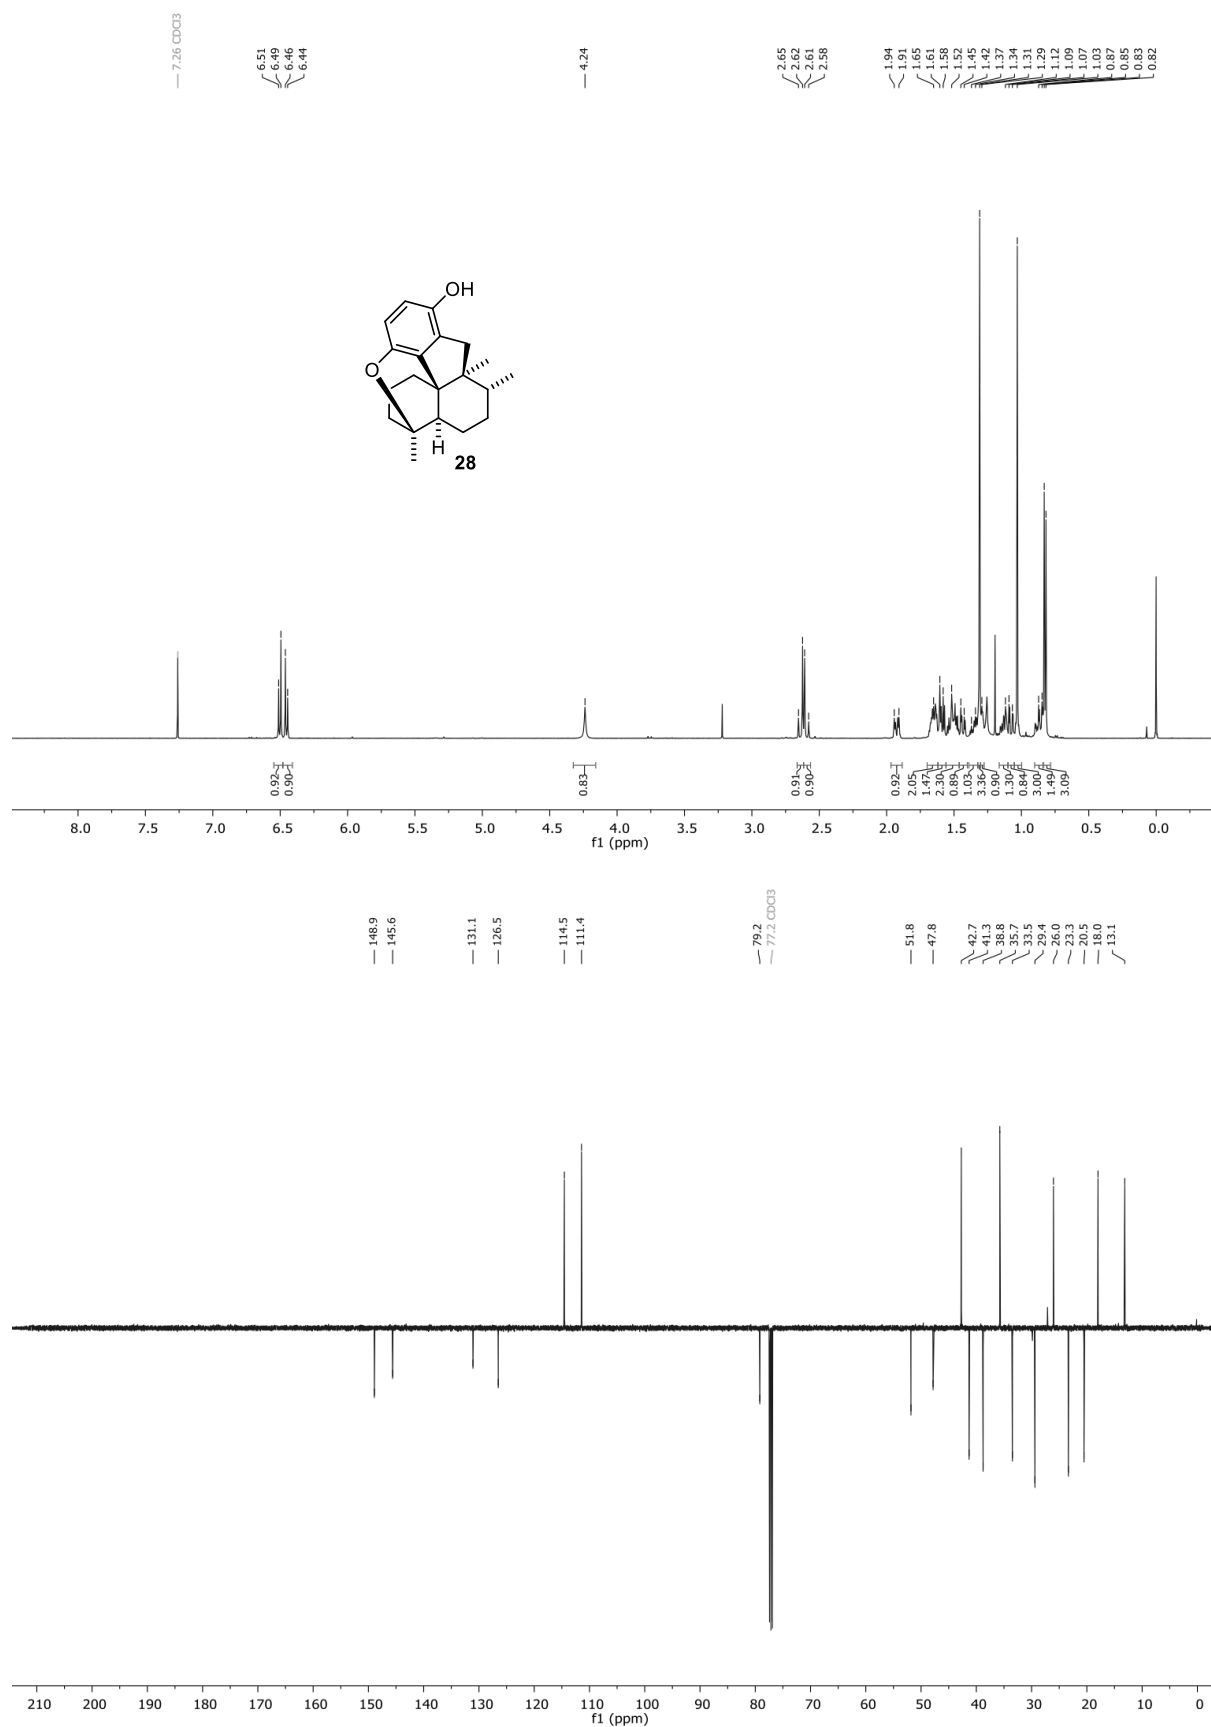

6.21.  $^1\text{H}$  and  $^{13}\text{C}$  NMR of Olefin 33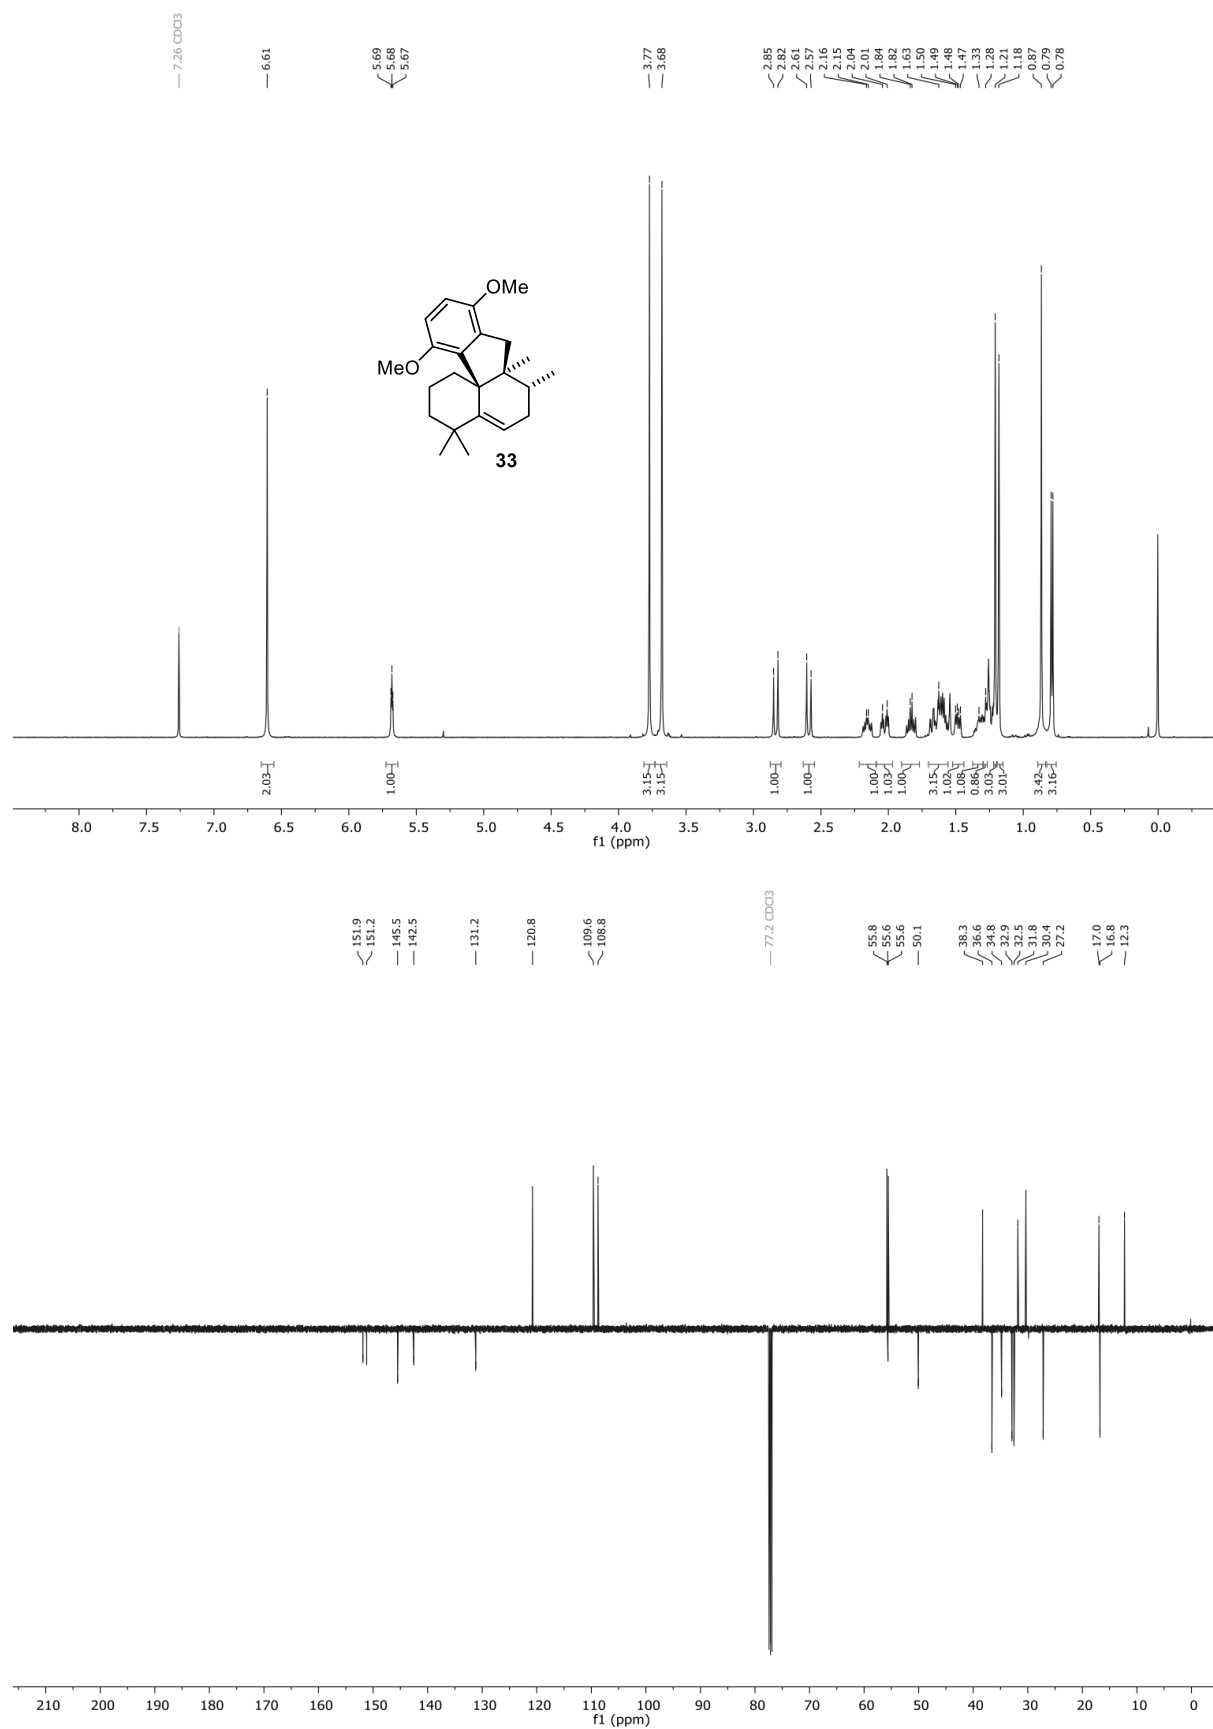

6.22. <sup>1</sup>H and <sup>13</sup>C NMR of (–)-dysiherbol A Methyl Ether (32)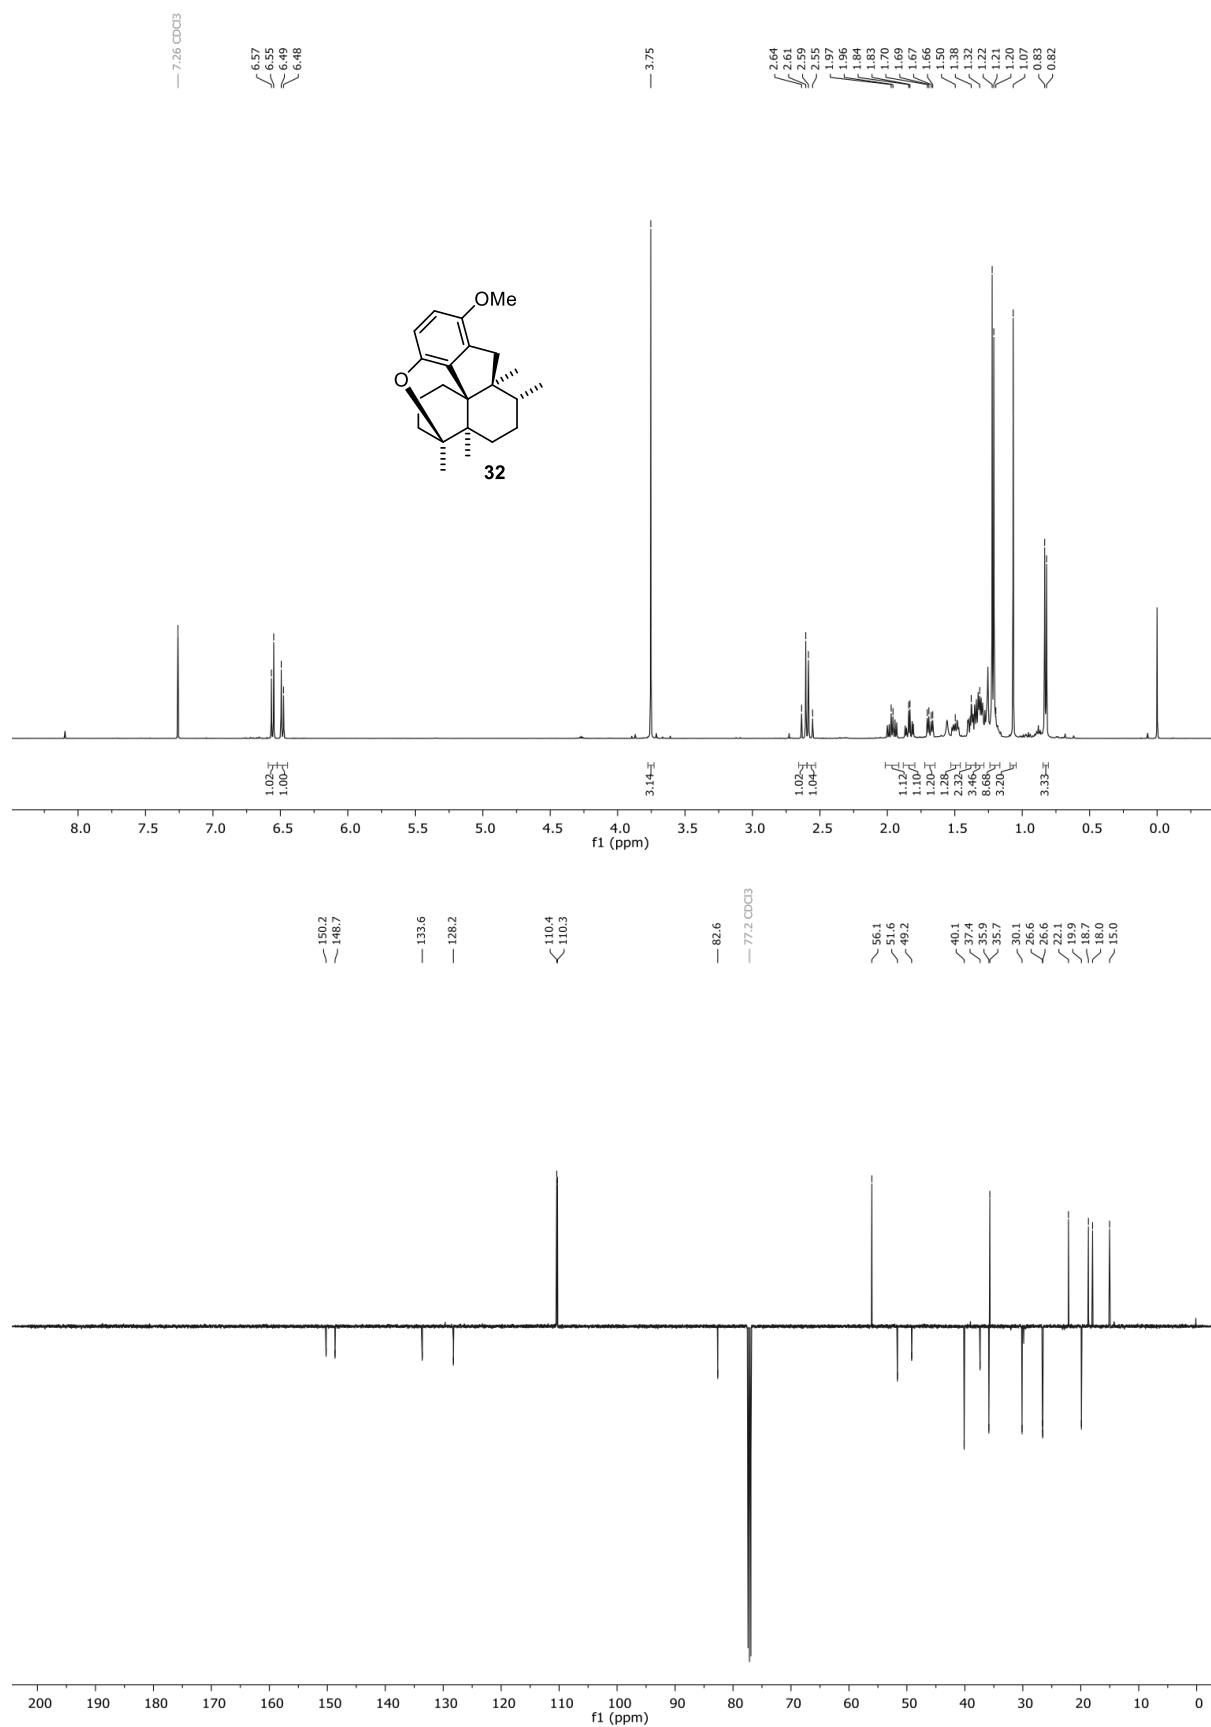



6.23.  $^1\text{H}$  and  $^{13}\text{C}$  NMR of Enol Ether 18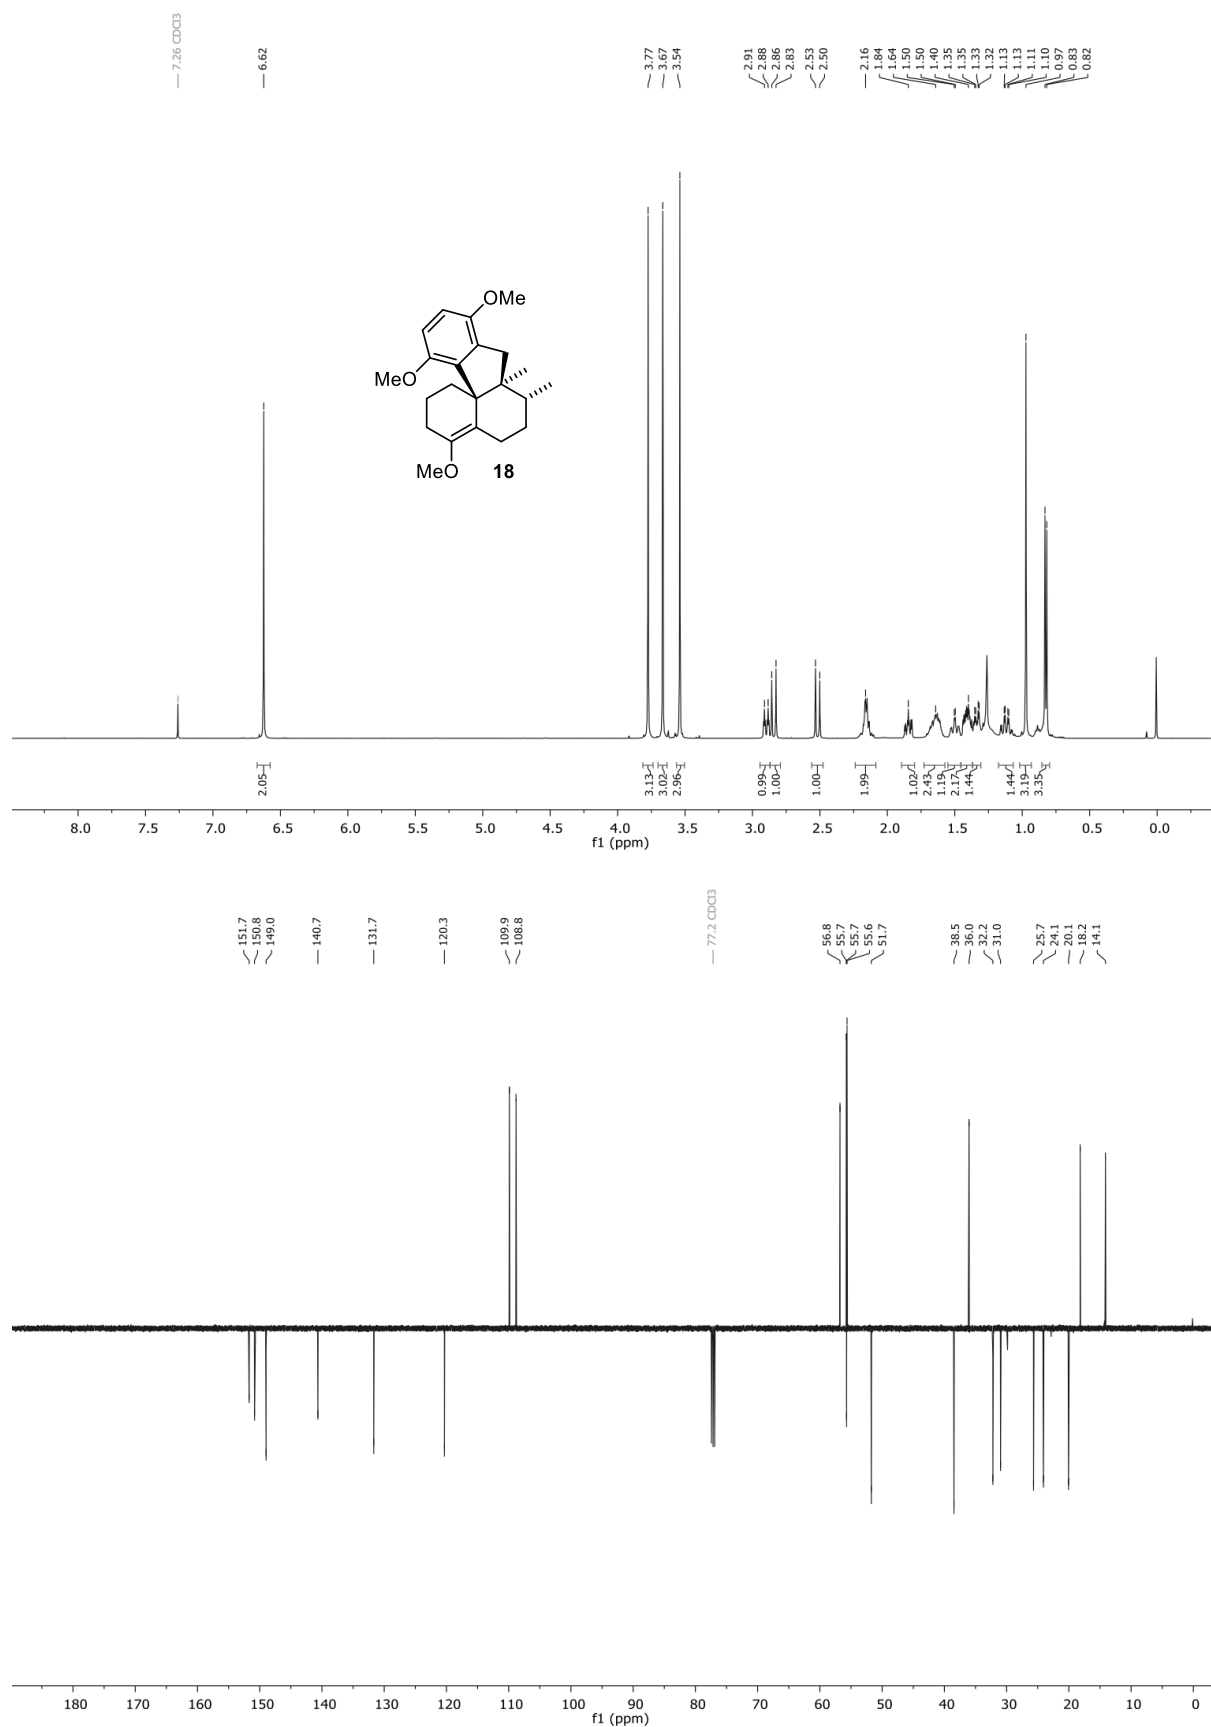

6.24.  $^1\text{H}$  and  $^{13}\text{C}$  NMR of Cyclopropane 19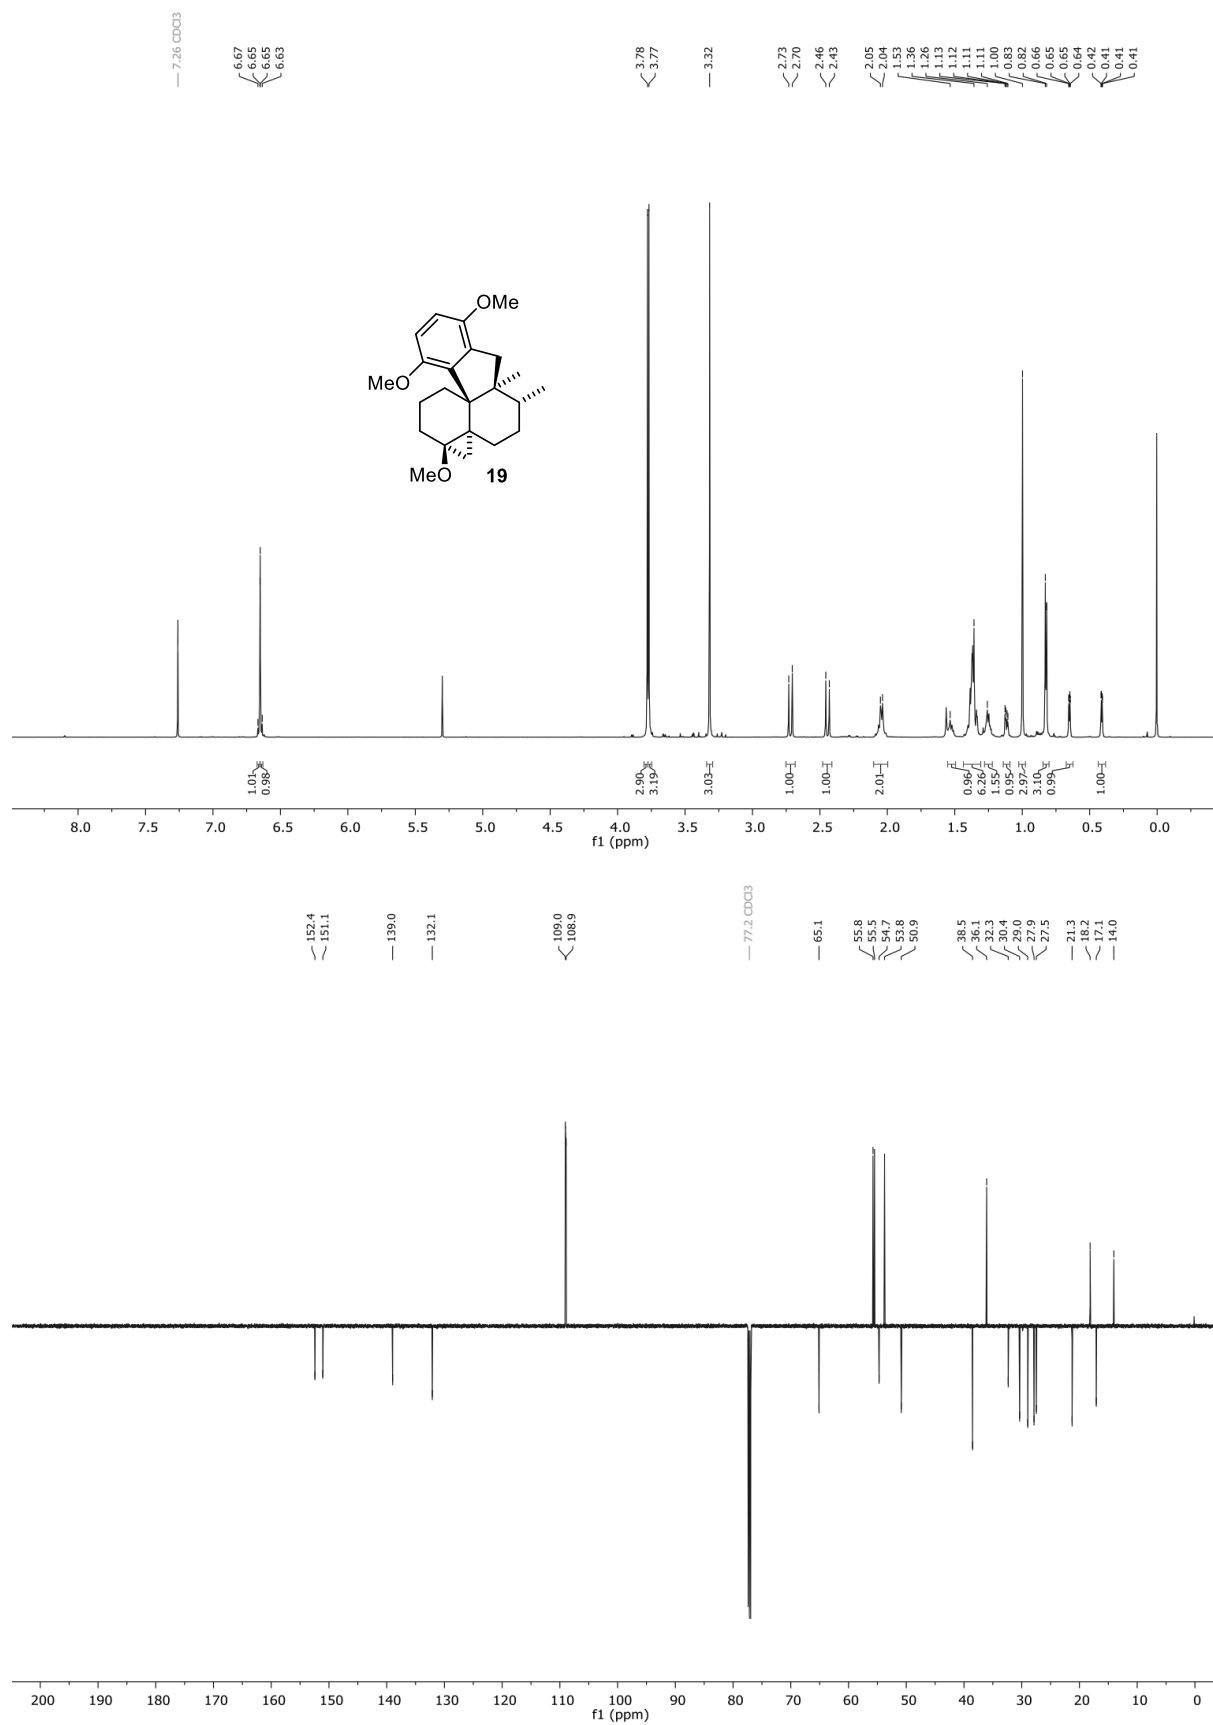

6.25.  $^1\text{H}$  and  $^{13}\text{C}$  NMR of Ketone 20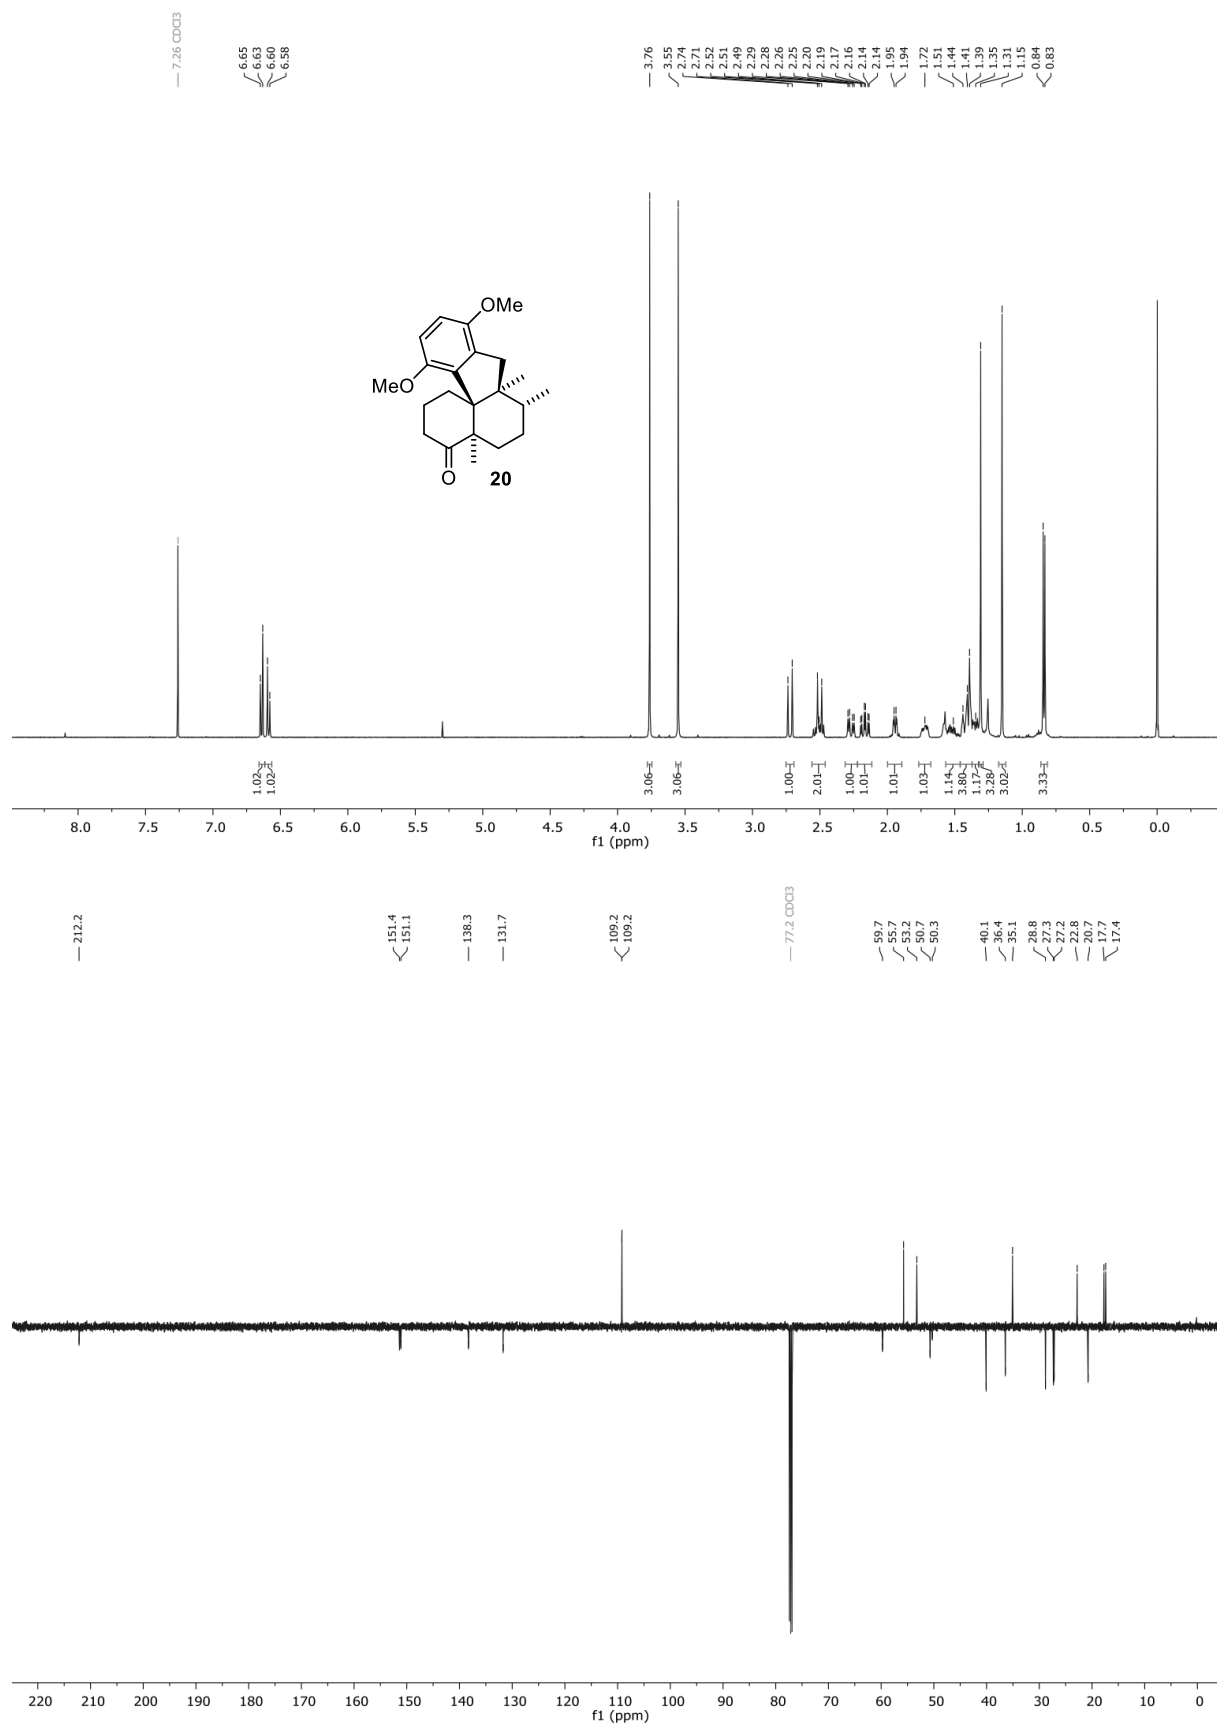

6.26.  $^1\text{H}$  and  $^{13}\text{C}$  NMR of Allylic Alcohol 25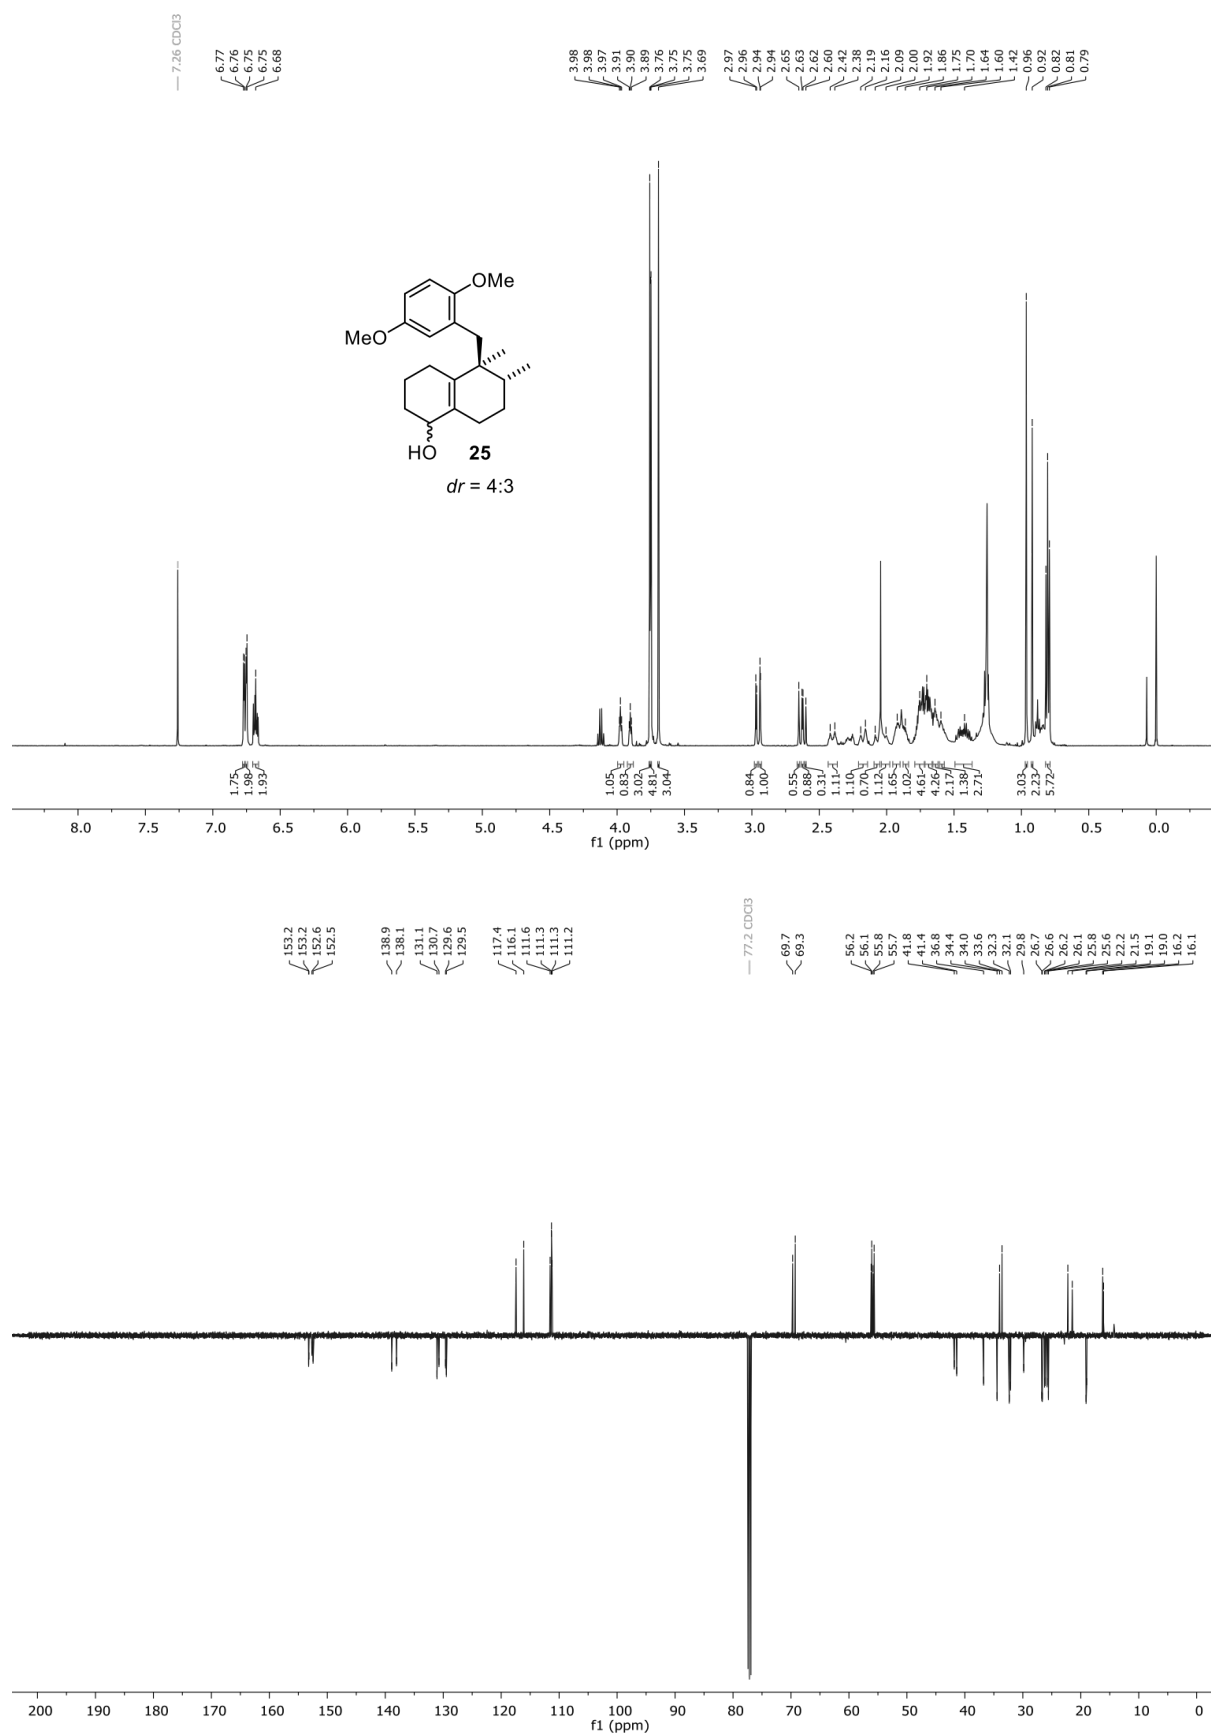

## 7. X-ray Crystallographic Data

7.1. X-ray Crystallographic Data of (2*S*,3*R*)-2-(2,5-Dimethoxybenzyl)-2,3-dimethylcyclohexanone (11)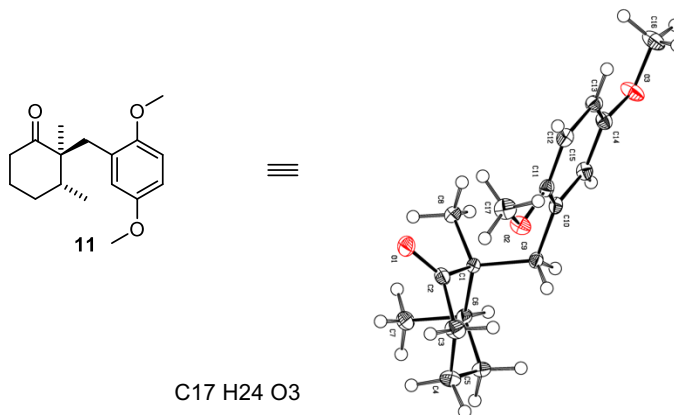

CCDC 2077905

|                                   |                                                |          |
|-----------------------------------|------------------------------------------------|----------|
| Empirical formula                 | C <sub>17</sub> H <sub>24</sub> O <sub>3</sub> |          |
| Formula weight                    | 276.36                                         |          |
| Temperature                       | 100(2) K                                       |          |
| Wavelength                        | 1.54178 Å                                      |          |
| Crystal system                    | Orthorhombic                                   |          |
| Space group                       | P2 <sub>1</sub> 2 <sub>1</sub> 2 <sub>1</sub>  |          |
| Unit cell dimensions              | a = 7.0055(3) Å                                | a = 90°. |
|                                   | b = 12.6745(5) Å                               | b = 90°. |
|                                   | c = 17.0091(6) Å                               | g = 90°. |
| Volume                            | 1510.26(10) Å <sup>3</sup>                     |          |
| Z                                 | 4                                              |          |
| Density (calculated)              | 1.215 Mg/m <sup>3</sup>                        |          |
| Absorption coefficient            | 0.650 mm <sup>-1</sup>                         |          |
| F(000)                            | 600                                            |          |
| Crystal size                      | 0.200 x 0.200 x 0.060 mm <sup>3</sup>          |          |
| Theta range for data collection   | 4.350 to 72.086°.                              |          |
| Index ranges                      | -8<=h<=8, -15<=k<=15, -20<=l<=20               |          |
| Reflections collected             | 45975                                          |          |
| Independent reflections           | 2980 [R(int) = 0.0348]                         |          |
| Completeness to theta = 67.679°   | 99.9 %                                         |          |
| Absorption correction             | Semi-empirical from equivalents                |          |
| Max. and min. transmission        | 0.7536 and 0.6732                              |          |
| Refinement method                 | Full-matrix least-squares on F <sup>2</sup>    |          |
| Data / restraints / parameters    | 2980 / 0 / 186                                 |          |
| Goodness-of-fit on F <sup>2</sup> | 1.072                                          |          |
| Final R indices [I>2sigma(I)]     | R1 = 0.0251, wR2 = 0.0667                      |          |
| R indices (all data)              | R1 = 0.0253, wR2 = 0.0668                      |          |
| Absolute structure parameter      | 0.030(18)                                      |          |
| Extinction coefficient            | 0.0069(7)                                      |          |
| Largest diff. peak and hole       | 0.215 and -0.166 e.Å <sup>-3</sup>             |          |

7.2. X-ray Crystallographic Data of (2*R*,3*R*)-2-(2,5-Dimethoxybenzyl)-2,3-dimethylcyclohexanone (*epi*-11)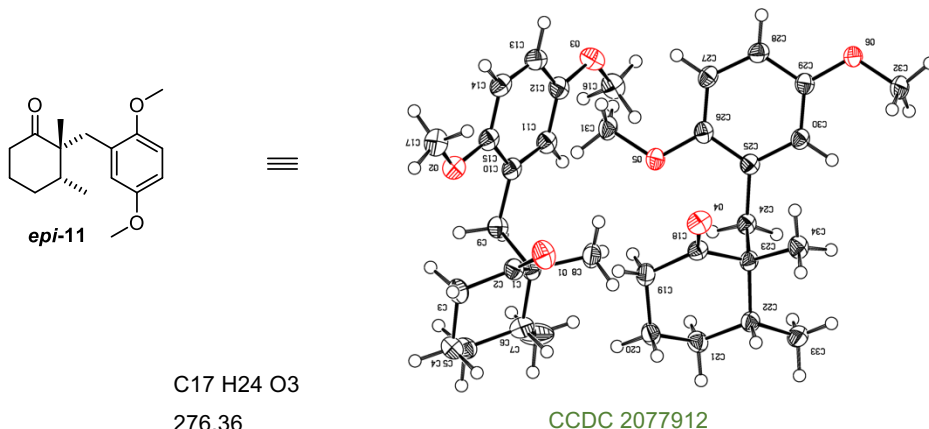

|                                   |                                                |                 |
|-----------------------------------|------------------------------------------------|-----------------|
| Empirical formula                 | C <sub>17</sub> H <sub>24</sub> O <sub>3</sub> |                 |
| Formula weight                    | 276.36                                         |                 |
| Temperature                       | 100(2) K                                       |                 |
| Wavelength                        | 1.54178 Å                                      |                 |
| Crystal system                    | Triclinic                                      |                 |
| Space group                       | P1                                             |                 |
| Unit cell dimensions              | a = 7.3458(9) Å                                | a = 103.635(5)° |
|                                   | b = 9.8517(11) Å                               | b = 91.317(5)°  |
|                                   | c = 10.8463(12) Å                              | g = 90.511(5)°  |
| Volume                            | 762.53(15) Å <sup>3</sup>                      |                 |
| Z                                 | 2                                              |                 |
| Density (calculated)              | 1.204 Mg/m <sup>3</sup>                        |                 |
| Absorption coefficient            | 0.644 mm <sup>-1</sup>                         |                 |
| F(000)                            | 300                                            |                 |
| Crystal size                      | 0.100 x 0.100 x 0.040 mm <sup>3</sup>          |                 |
| Theta range for data collection   | 4.195 to 72.398°                               |                 |
| Index ranges                      | -9<=h<=9, -12<=k<=12, -13<=l<=13               |                 |
| Reflections collected             | 23962                                          |                 |
| Independent reflections           | 5683 [R(int) = 0.0763]                         |                 |
| Completeness to theta = 67.679°   | 99.2 %                                         |                 |
| Absorption correction             | Semi-empirical from equivalents                |                 |
| Max. and min. transmission        | 0.7536 and 0.5937                              |                 |
| Refinement method                 | Full-matrix least-squares on F <sup>2</sup>    |                 |
| Data / restraints / parameters    | 5683 / 3 / 369                                 |                 |
| Goodness-of-fit on F <sup>2</sup> | 1.058                                          |                 |
| Final R indices [I>2sigma(I)]     | R1 = 0.0386, wR2 = 0.1044                      |                 |
| R indices (all data)              | R1 = 0.0409, wR2 = 0.1059                      |                 |
| Absolute structure parameter      | 0.11(8)                                        |                 |
| Extinction coefficient            | n/a                                            |                 |
| Largest diff. peak and hole       | 0.197 and -0.242 e.Å <sup>-3</sup>             |                 |

## 7.3. X-ray Crystallographic Data of Olefin 17

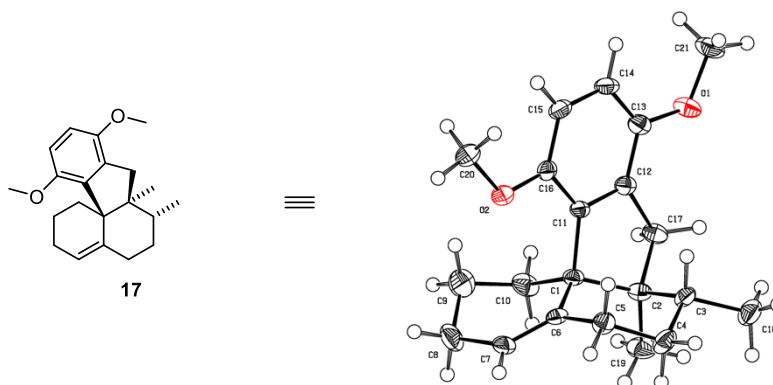

CCDC 2077903

|                                   |                                                                                                     |
|-----------------------------------|-----------------------------------------------------------------------------------------------------|
| Empirical formula                 | C <sub>21</sub> H <sub>28</sub> O <sub>2</sub>                                                      |
| Formula weight                    | 312.43                                                                                              |
| Temperature                       | 100(2) K                                                                                            |
| Wavelength                        | 1.54178 Å                                                                                           |
| Crystal system                    | Hexagonal                                                                                           |
| Space group                       | P6 <sub>3</sub>                                                                                     |
| Unit cell dimensions              | a = 13.3520(4) Å      a = 90°.<br>b = 13.3520(4) Å      b = 90°.<br>c = 17.1138(7) Å      g = 120°. |
| Volume                            | 2642.22(19) Å <sup>3</sup>                                                                          |
| Z                                 | 6                                                                                                   |
| Density (calculated)              | 1.178 Mg/m <sup>3</sup>                                                                             |
| Absorption coefficient            | 0.571 mm <sup>-1</sup>                                                                              |
| F(000)                            | 1020                                                                                                |
| Crystal size                      | 0.200 x 0.100 x 0.070 mm <sup>3</sup>                                                               |
| Theta range for data collection   | 3.823 to 72.044°.                                                                                   |
| Index ranges                      | -16<=h<=16, -16<=k<=16, -21<=l<=21                                                                  |
| Reflections collected             | 32133                                                                                               |
| Independent reflections           | 3489 [R(int) = 0.0798]                                                                              |
| Completeness to theta = 67.679°   | 100.0 %                                                                                             |
| Absorption correction             | Semi-empirical from equivalents                                                                     |
| Max. and min. transmission        | 0.7536 and 0.5950                                                                                   |
| Refinement method                 | Full-matrix least-squares on F <sup>2</sup>                                                         |
| Data / restraints / parameters    | 3489 / 1 / 212                                                                                      |
| Goodness-of-fit on F <sup>2</sup> | 1.045                                                                                               |
| Final R indices [I>2sigma(I)]     | R1 = 0.0444, wR2 = 0.1030                                                                           |
| R indices (all data)              | R1 = 0.0490, wR2 = 0.1066                                                                           |
| Absolute structure parameter      | 0.17(12)                                                                                            |
| Extinction coefficient            | n/a                                                                                                 |
| Largest diff. peak and hole       | 0.487 and -0.212 e.Å <sup>-3</sup>                                                                  |

## 7.4. X-ray Crystallographic Data of Ketone 9

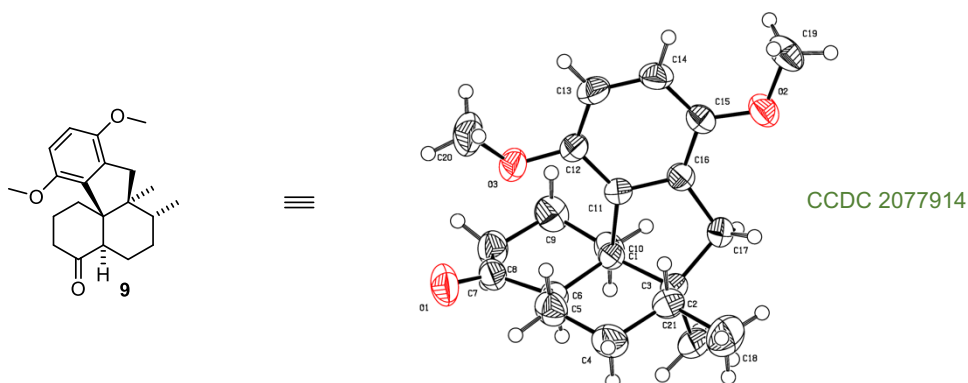

|                                   |                                                |          |
|-----------------------------------|------------------------------------------------|----------|
| Empirical formula                 | C <sub>21</sub> H <sub>28</sub> O <sub>3</sub> |          |
| Formula weight                    | 328.43                                         |          |
| Temperature                       | 295(2) K                                       |          |
| Wavelength                        | 1.54178 Å                                      |          |
| Crystal system                    | Orthorhombic                                   |          |
| Space group                       | P2 <sub>1</sub> 2 <sub>1</sub> 2 <sub>1</sub>  |          |
| Unit cell dimensions              | a = 10.6575(2) Å                               | a = 90°. |
|                                   | b = 11.2368(3) Å                               | b = 90°. |
|                                   | c = 15.3203(4) Å                               | g = 90°. |
| Volume                            | 1834.70(8) Å <sup>3</sup>                      |          |
| Z                                 | 4                                              |          |
| Density (calculated)              | 1.189 Mg/m <sup>3</sup>                        |          |
| Absorption coefficient            | 0.614 mm <sup>-1</sup>                         |          |
| F(000)                            | 712                                            |          |
| Crystal size                      | 0.100 x 0.070 x 0.050 mm <sup>3</sup>          |          |
| Theta range for data collection   | 4.881 to 72.208°.                              |          |
| Index ranges                      | -13 ≤ h ≤ 11, -13 ≤ k ≤ 13, -18 ≤ l ≤ 18       |          |
| Reflections collected             | 40088                                          |          |
| Independent reflections           | 3616 [R(int) = 0.0534]                         |          |
| Completeness to theta = 67.679°   | 99.9 %                                         |          |
| Absorption correction             | Semi-empirical from equivalents                |          |
| Max. and min. transmission        | 0.7536 and 0.5789                              |          |
| Refinement method                 | Full-matrix least-squares on F <sup>2</sup>    |          |
| Data / restraints / parameters    | 3616 / 0 / 221                                 |          |
| Goodness-of-fit on F <sup>2</sup> | 1.111                                          |          |
| Final R indices [I > 2σ(I)]       | R1 = 0.0310, wR2 = 0.0886                      |          |
| R indices (all data)              | R1 = 0.0386, wR2 = 0.0980                      |          |
| Absolute structure parameter      | 0.01(7)                                        |          |
| Extinction coefficient            | n/a                                            |          |
| Largest diff. peak and hole       | 0.296 and -0.331 e.Å <sup>-3</sup>             |          |



## 7.5. X-ray Crystallographic Data of Alcohol 26

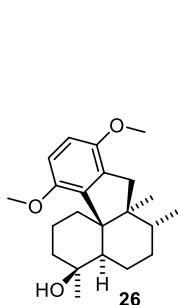

≡

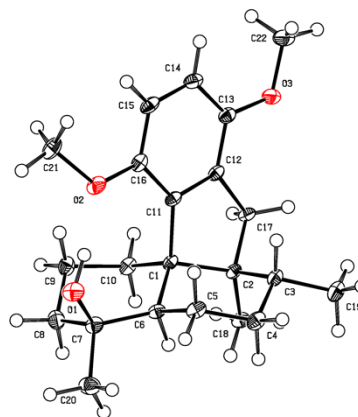

CCDC 2077910

|                                   |                                                |                    |
|-----------------------------------|------------------------------------------------|--------------------|
| Empirical formula                 | C <sub>22</sub> H <sub>32</sub> O <sub>3</sub> |                    |
| Formula weight                    | 344.47                                         |                    |
| Temperature                       | 100(2) K                                       |                    |
| Wavelength                        | 1.54178 Å                                      |                    |
| Crystal system                    | Monoclinic                                     |                    |
| Space group                       | P2 <sub>1</sub>                                |                    |
| Unit cell dimensions              | a = 10.2318(4) Å                               | a = 90°.           |
|                                   | b = 7.4733(3) Å                                | b = 102.9009(13)°. |
|                                   | c = 12.4504(4) Å                               | g = 90°.           |
| Volume                            | 927.99(6) Å <sup>3</sup>                       |                    |
| Z                                 | 2                                              |                    |
| Density (calculated)              | 1.233 Mg/m <sup>3</sup>                        |                    |
| Absorption coefficient            | 0.627 mm <sup>-1</sup>                         |                    |
| F(000)                            | 376                                            |                    |
| Crystal size                      | 0.200 x 0.200 x 0.100 mm <sup>3</sup>          |                    |
| Theta range for data collection   | 3.642 to 72.098°.                              |                    |
| Index ranges                      | -12 ≤ h ≤ 12, -8 ≤ k ≤ 9, -15 ≤ l ≤ 15         |                    |
| Reflections collected             | 14198                                          |                    |
| Independent reflections           | 3604 [R(int) = 0.0442]                         |                    |
| Completeness to theta = 67.679°   | 99.9 %                                         |                    |
| Absorption correction             | Semi-empirical from equivalents                |                    |
| Max. and min. transmission        | 0.7536 and 0.4307                              |                    |
| Refinement method                 | Full-matrix least-squares on F <sup>2</sup>    |                    |
| Data / restraints / parameters    | 3604 / 1 / 239                                 |                    |
| Goodness-of-fit on F <sup>2</sup> | 1.075                                          |                    |
| Final R indices [I > 2σ(I)]       | R1 = 0.0333, wR2 = 0.0832                      |                    |
| R indices (all data)              | R1 = 0.0345, wR2 = 0.0846                      |                    |
| Absolute structure parameter      | 0.22(8)                                        |                    |
| Extinction coefficient            | n/a                                            |                    |
| Largest diff. peak and hole       | 0.163 and -0.212 e.Å <sup>-3</sup>             |                    |

## 7.6. X-ray Crystallographic Data of Olefin 29

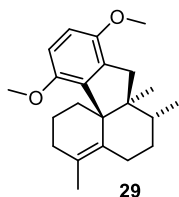

≡

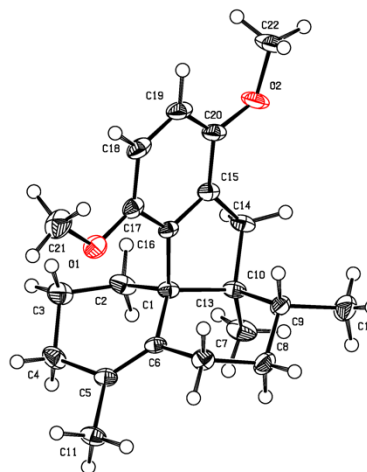

CCDC 2077904

|                                   |                                                                                                     |
|-----------------------------------|-----------------------------------------------------------------------------------------------------|
| Empirical formula                 | C <sub>22</sub> H <sub>30</sub> O <sub>2</sub>                                                      |
| Formula weight                    | 326.46                                                                                              |
| Temperature                       | 100(2) K                                                                                            |
| Wavelength                        | 1.54178 Å                                                                                           |
| Crystal system                    | Hexagonal                                                                                           |
| Space group                       | P6 <sub>3</sub>                                                                                     |
| Unit cell dimensions              | a = 13.5697(3) Å      a = 90°.<br>b = 13.5697(3) Å      b = 90°.<br>c = 17.4684(5) Å      g = 120°. |
| Volume                            | 2785.63(15) Å <sup>3</sup>                                                                          |
| Z                                 | 6                                                                                                   |
| Density (calculated)              | 1.168 Mg/m <sup>3</sup>                                                                             |
| Absorption coefficient            | 0.561 mm <sup>-1</sup>                                                                              |
| F(000)                            | 1068                                                                                                |
| Crystal size                      | 0.200 x 0.150 x 0.100 mm <sup>3</sup>                                                               |
| Theta range for data collection   | 3.761 to 72.184°.                                                                                   |
| Index ranges                      | -16 ≤ h ≤ 13, -16 ≤ k ≤ 16, -21 ≤ l ≤ 21                                                            |
| Reflections collected             | 34153                                                                                               |
| Independent reflections           | 3671 [R(int) = 0.0590]                                                                              |
| Completeness to theta = 67.679°   | 100.0 %                                                                                             |
| Absorption correction             | Semi-empirical from equivalents                                                                     |
| Max. and min. transmission        | 0.7536 and 0.5997                                                                                   |
| Refinement method                 | Full-matrix least-squares on F <sup>2</sup>                                                         |
| Data / restraints / parameters    | 3671 / 1 / 222                                                                                      |
| Goodness-of-fit on F <sup>2</sup> | 1.076                                                                                               |
| Final R indices [I > 2σ(I)]       | R1 = 0.0365, wR2 = 0.0881                                                                           |
| R indices (all data)              | R1 = 0.0394, wR2 = 0.0905                                                                           |
| Absolute structure parameter      | 0.12(8)                                                                                             |
| Extinction coefficient            | n/a                                                                                                 |
| Largest diff. peak and hole       | 0.205 and -0.181 e.Å <sup>-3</sup>                                                                  |

## 7.7. X-ray Crystallographic Data of (-)-dysiherbol A – MeOH complex (31-MeOH)

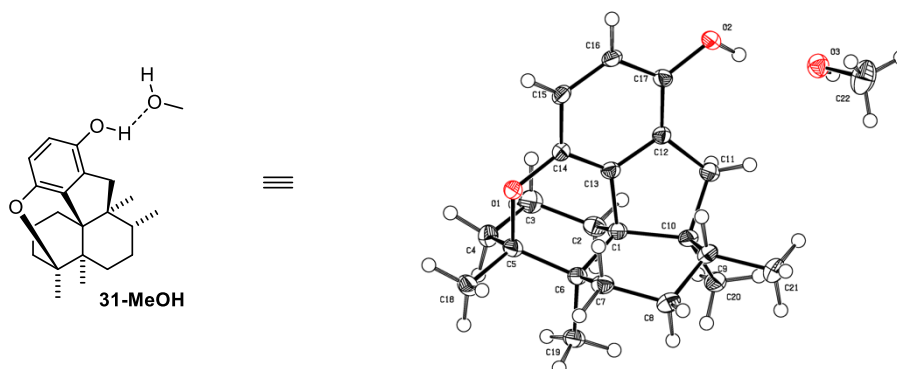

|                                   |                                                                                  |              |
|-----------------------------------|----------------------------------------------------------------------------------|--------------|
| Moiety formula                    | C <sub>21</sub> H <sub>28</sub> O <sub>2</sub> , C <sub>4</sub> H <sub>4</sub> O | CCDC 2077913 |
| Formula weight                    | 344.47                                                                           |              |
| Temperature                       | 100(2) K                                                                         |              |
| Wavelength                        | 1.54178 Å                                                                        |              |
| Crystal system                    | Orthorhombic                                                                     |              |
| Space group                       | P2 <sub>1</sub> 2 <sub>1</sub> 2 <sub>1</sub>                                    |              |
| Unit cell dimensions              | a = 9.4931(5) Å                                                                  | a = 90°.     |
|                                   | b = 12.8945(7) Å                                                                 | b = 90°.     |
|                                   | c = 15.0694(9) Å                                                                 | g = 90°.     |
| Volume                            | 1844.63(18) Å <sup>3</sup>                                                       |              |
| Z                                 | 4                                                                                |              |
| Density (calculated)              | 1.240 Mg/m <sup>3</sup>                                                          |              |
| Absorption coefficient            | 0.631 mm <sup>-1</sup>                                                           |              |
| F(000)                            | 752                                                                              |              |
| Crystal size                      | 0.150 x 0.080 x 0.080 mm <sup>3</sup>                                            |              |
| Theta range for data collection   | 4.513 to 72.088°.                                                                |              |
| Index ranges                      | -11<=h<=11, -14<=k<=15, -18<=l<=18                                               |              |
| Reflections collected             | 108102                                                                           |              |
| Independent reflections           | 3629 [R(int) = 0.0575]                                                           |              |
| Completeness to theta = 67.679°   | 99.9 %                                                                           |              |
| Absorption correction             | Semi-empirical from equivalents                                                  |              |
| Max. and min. transmission        | 0.7536 and 0.6407                                                                |              |
| Refinement method                 | Full-matrix least-squares on F <sup>2</sup>                                      |              |
| Data / restraints / parameters    | 3629 / 0 / 239                                                                   |              |
| Goodness-of-fit on F <sup>2</sup> | 1.081                                                                            |              |
| Final R indices [I>2sigma(I)]     | R1 = 0.0283, wR2 = 0.0770                                                        |              |
| R indices (all data)              | R1 = 0.0289, wR2 = 0.0777                                                        |              |
| Absolute structure parameter      | 0.04(3)                                                                          |              |
| Extinction coefficient            | n/a                                                                              |              |
| Largest diff. peak and hole       | 0.235 and -0.128 e.Å <sup>-3</sup>                                               |              |

7.8. X-ray Crystallographic Data of Triol 27 (as a 4:3 complex with Et<sub>2</sub>O)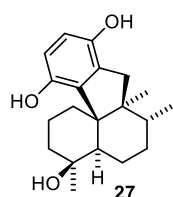

≡

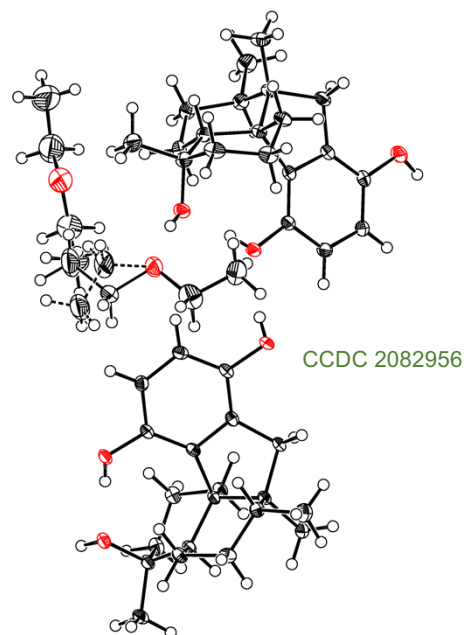

|                                   |                                                                                         |                                            |
|-----------------------------------|-----------------------------------------------------------------------------------------|--------------------------------------------|
| Moiety formula                    | 4(C <sub>20</sub> H <sub>28</sub> O <sub>3</sub> ), 3(C <sub>4</sub> H <sub>10</sub> O) |                                            |
| Formula weight                    | 1488.05                                                                                 |                                            |
| Temperature                       | 100(2) K                                                                                |                                            |
| Wavelength                        | 1.54178 Å                                                                               |                                            |
| Crystal system                    | Monoclinic                                                                              |                                            |
| Space group                       | C2                                                                                      |                                            |
| Unit cell dimensions              | a = 34.7475(10) Å<br>b = 7.2447(2) Å<br>c = 20.4133(5) Å                                | a = 90°.<br>b = 125.6620(10)°.<br>g = 90°. |
| Volume                            | 4175.1(2) Å <sup>3</sup>                                                                |                                            |
| Z                                 | 2                                                                                       |                                            |
| Density (calculated)              | 1.184 Mg/m <sup>3</sup>                                                                 |                                            |
| Absorption coefficient            | 0.619 mm <sup>-1</sup>                                                                  |                                            |
| F(000)                            | 1628                                                                                    |                                            |
| Crystal size                      | 0.150 x 0.150 x 0.020 mm <sup>3</sup>                                                   |                                            |
| Theta range for data collection   | 2.664 to 72.368°.                                                                       |                                            |
| Index ranges                      | -42<=h<=42, -8<=k<=8, -25<=l<=24                                                        |                                            |
| Reflections collected             | 66221                                                                                   |                                            |
| Independent reflections           | 8188 [R(int) = 0.0776]                                                                  |                                            |
| Completeness to theta = 67.679°   | 100.0 %                                                                                 |                                            |
| Absorption correction             | Semi-empirical from equivalents                                                         |                                            |
| Max. and min. transmission        | 0.7536 and 0.5387                                                                       |                                            |
| Refinement method                 | Full-matrix least-squares on F <sup>2</sup>                                             |                                            |
| Data / restraints / parameters    | 8188 / 1 / 535                                                                          |                                            |
| Goodness-of-fit on F <sup>2</sup> | 1.035                                                                                   |                                            |
| Final R indices [I>2sigma(I)]     | R1 = 0.0431, wR2 = 0.1176                                                               |                                            |
| R indices (all data)              | R1 = 0.0468, wR2 = 0.1209                                                               |                                            |
| Absolute structure parameter      | -0.06(8)                                                                                |                                            |
| Extinction coefficient            | n/a                                                                                     |                                            |
| Largest diff. peak and hole       | 0.565 and -0.502 e.Å <sup>-3</sup>                                                      |                                            |

## 7.9. X-ray Crystallographic Data of Olefin 33

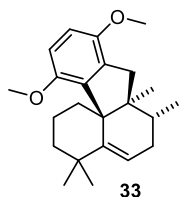

≡

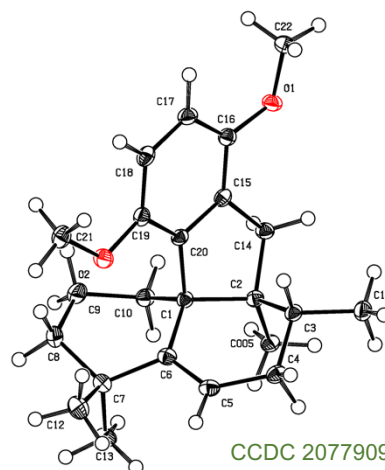

|                                   |                                                |          |
|-----------------------------------|------------------------------------------------|----------|
| Empirical formula                 | C <sub>23</sub> H <sub>32</sub> O <sub>2</sub> |          |
| Formula weight                    | 340.48                                         |          |
| Temperature                       | 100(2) K                                       |          |
| Wavelength                        | 1.54178 Å                                      |          |
| Crystal system                    | Orthorhombic                                   |          |
| Space group                       | P2 <sub>1</sub> 2 <sub>1</sub> 2 <sub>1</sub>  |          |
| Unit cell dimensions              | a = 9.4580(2) Å                                | a = 90°. |
|                                   | b = 13.6332(2) Å                               | b = 90°. |
|                                   | c = 14.3762(2) Å                               | g = 90°. |
| Volume                            | 1853.71(5) Å <sup>3</sup>                      |          |
| Z                                 | 4                                              |          |
| Density (calculated)              | 1.220 Mg/m <sup>3</sup>                        |          |
| Absorption coefficient            | 0.582 mm <sup>-1</sup>                         |          |
| F(000)                            | 744                                            |          |
| Crystal size                      | 0.300 x 0.080 x 0.080 mm <sup>3</sup>          |          |
| Theta range for data collection   | 4.469 to 72.280°.                              |          |
| Index ranges                      | -11 ≤ h ≤ 11, -16 ≤ k ≤ 16, -17 ≤ l ≤ 17       |          |
| Reflections collected             | 79725                                          |          |
| Independent reflections           | 3657 [R(int) = 0.0486]                         |          |
| Completeness to theta = 67.679°   | 100.0 %                                        |          |
| Absorption correction             | Semi-empirical from equivalents                |          |
| Max. and min. transmission        | 0.7536 and 0.6367                              |          |
| Refinement method                 | Full-matrix least-squares on F <sup>2</sup>    |          |
| Data / restraints / parameters    | 3657 / 0 / 232                                 |          |
| Goodness-of-fit on F <sup>2</sup> | 1.053                                          |          |
| Final R indices [I > 2σ(I)]       | R1 = 0.0263, wR2 = 0.0677                      |          |
| R indices (all data)              | R1 = 0.0267, wR2 = 0.0681                      |          |
| Absolute structure parameter      | 0.03(4)                                        |          |
| Extinction coefficient            | n/a                                            |          |
| Largest diff. peak and hole       | 0.189 and -0.167 e.Å <sup>-3</sup>             |          |

## 7.10. X-ray Crystallographic Data of (-)-dysiherbol A Methyl Ether (32)

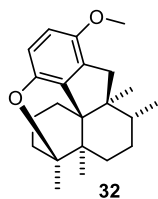

≡

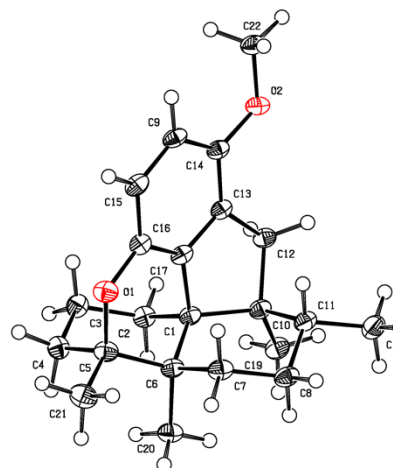

CCDC 2077906

|                                   |                                                                                                     |
|-----------------------------------|-----------------------------------------------------------------------------------------------------|
| Empirical formula                 | C <sub>22</sub> H <sub>30</sub> O <sub>2</sub>                                                      |
| Formula weight                    | 326.46                                                                                              |
| Temperature                       | 100(2) K                                                                                            |
| Wavelength                        | 1.54178 Å                                                                                           |
| Crystal system                    | Orthorhombic                                                                                        |
| Space group                       | P2 <sub>1</sub> 2 <sub>1</sub> 2 <sub>1</sub>                                                       |
| Unit cell dimensions              | a = 6.79900(10) Å      a = 90°.<br>b = 15.8982(3) Å      b = 90°.<br>c = 16.3340(3) Å      g = 90°. |
| Volume                            | 1765.57(5) Å <sup>3</sup>                                                                           |
| Z                                 | 4                                                                                                   |
| Density (calculated)              | 1.228 Mg/m <sup>3</sup>                                                                             |
| Absorption coefficient            | 0.590 mm <sup>-1</sup>                                                                              |
| F(000)                            | 712                                                                                                 |
| Crystal size                      | 0.100 x 0.070 x 0.040 mm <sup>3</sup>                                                               |
| Theta range for data collection   | 3.880 to 72.071°.                                                                                   |
| Index ranges                      | -8<=h<=8, -19<=k<=19, -20<=l<=20                                                                    |
| Reflections collected             | 75244                                                                                               |
| Independent reflections           | 3480 [R(int) = 0.0654]                                                                              |
| Completeness to theta = 67.679°   | 100.0 %                                                                                             |
| Absorption correction             | Semi-empirical from equivalents                                                                     |
| Max. and min. transmission        | 0.7536 and 0.5811                                                                                   |
| Refinement method                 | Full-matrix least-squares on F <sup>2</sup>                                                         |
| Data / restraints / parameters    | 3480 / 0 / 222                                                                                      |
| Goodness-of-fit on F <sup>2</sup> | 1.053                                                                                               |
| Final R indices [I>2sigma(I)]     | R1 = 0.0273, wR2 = 0.0705                                                                           |
| R indices (all data)              | R1 = 0.0280, wR2 = 0.0710                                                                           |
| Absolute structure parameter      | 0.10(5)                                                                                             |
| Extinction coefficient            | n/a                                                                                                 |
| Largest diff. peak and hole       | 0.160 and -0.140 e.Å <sup>-3</sup>                                                                  |

## 7.11. X-ray Crystallographic Data of Enol Ether 18

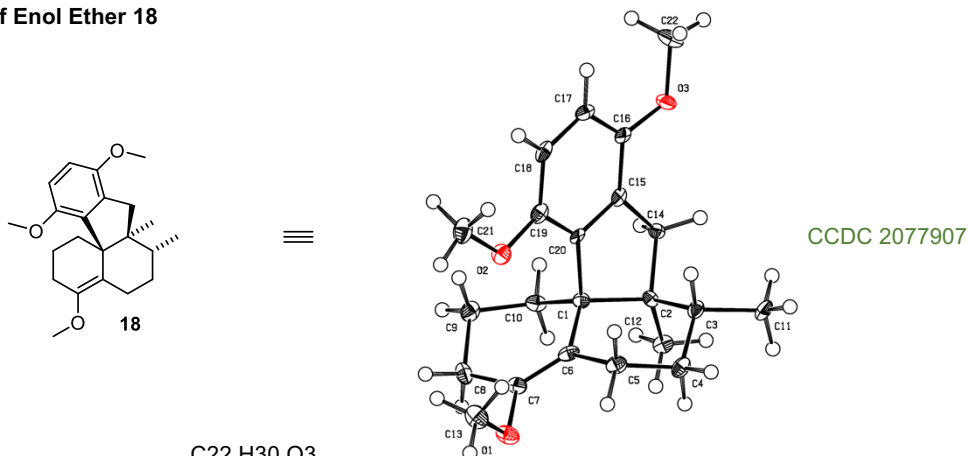

|                                   |                                                                                                   |
|-----------------------------------|---------------------------------------------------------------------------------------------------|
| Empirical formula                 | C <sub>22</sub> H <sub>30</sub> O <sub>3</sub>                                                    |
| Formula weight                    | 342.46                                                                                            |
| Temperature                       | 100(2) K                                                                                          |
| Wavelength                        | 1.54178 Å                                                                                         |
| Crystal system                    | Orthorhombic                                                                                      |
| Space group                       | P2 <sub>1</sub> 2 <sub>1</sub> 2 <sub>1</sub>                                                     |
| Unit cell dimensions              | a = 9.9440(3) Å      a = 90°.<br>b = 11.1250(3) Å      b = 90°.<br>c = 16.6670(5) Å      g = 90°. |
| Volume                            | 1843.82(9) Å <sup>3</sup>                                                                         |
| Z                                 | 4                                                                                                 |
| Density (calculated)              | 1.234 Mg/m <sup>3</sup>                                                                           |
| Absorption coefficient            | 0.631 mm <sup>-1</sup>                                                                            |
| F(000)                            | 744                                                                                               |
| Crystal size                      | 0.100 x 0.020 x 0.010 mm <sup>3</sup>                                                             |
| Theta range for data collection   | 4.779 to 72.276°.                                                                                 |
| Index ranges                      | -12 ≤ h ≤ 12, -13 ≤ k ≤ 13, -20 ≤ l ≤ 20                                                          |
| Reflections collected             | 31542                                                                                             |
| Independent reflections           | 3629 [R(int) = 0.1326]                                                                            |
| Completeness to theta = 67.679°   | 100.0 %                                                                                           |
| Absorption correction             | Semi-empirical from equivalents                                                                   |
| Max. and min. transmission        | 0.7536 and 0.5205                                                                                 |
| Refinement method                 | Full-matrix least-squares on F <sup>2</sup>                                                       |
| Data / restraints / parameters    | 3629 / 0 / 231                                                                                    |
| Goodness-of-fit on F <sup>2</sup> | 1.226                                                                                             |
| Final R indices [I > 2σ(I)]       | R1 = 0.0664, wR2 = 0.1171                                                                         |
| R indices (all data)              | R1 = 0.0758, wR2 = 0.1202                                                                         |
| Absolute structure parameter      | 0.21(16)                                                                                          |
| Extinction coefficient            | n/a                                                                                               |
| Largest diff. peak and hole       | 0.310 and -0.263 e.Å <sup>-3</sup>                                                                |

## 7.12. X-ray Crystallographic Data of Cyclopropane 19

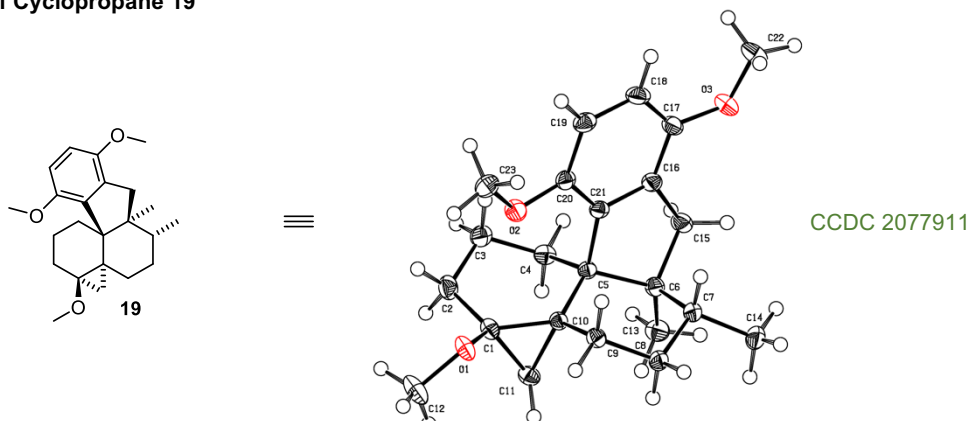

|                                   |                                                |                   |
|-----------------------------------|------------------------------------------------|-------------------|
| Empirical formula                 | C <sub>23</sub> H <sub>32</sub> O <sub>3</sub> |                   |
| Formula weight                    | 356.48                                         |                   |
| Temperature                       | 100(2) K                                       |                   |
| Wavelength                        | 1.54178 Å                                      |                   |
| Crystal system                    | Monoclinic                                     |                   |
| Space group                       | P2 <sub>1</sub>                                |                   |
| Unit cell dimensions              | a = 10.8315(3) Å                               | a = 90°.          |
|                                   | b = 7.4287(2) Å                                | b = 90.3890(10)°. |
|                                   | c = 12.4592(4) Å                               | g = 90°.          |
| Volume                            | 1002.49(5) Å <sup>3</sup>                      |                   |
| Z                                 | 2                                              |                   |
| Density (calculated)              | 1.181 Mg/m <sup>3</sup>                        |                   |
| Absorption coefficient            | 0.599 mm <sup>-1</sup>                         |                   |
| F(000)                            | 388                                            |                   |
| Crystal size                      | 0.150 x 0.080 x 0.040 mm <sup>3</sup>          |                   |
| Theta range for data collection   | 3.547 to 72.041°.                              |                   |
| Index ranges                      | -13<=h<=13, -9<=k<=9, -15<=l<=14               |                   |
| Reflections collected             | 21086                                          |                   |
| Independent reflections           | 3920 [R(int) = 0.0486]                         |                   |
| Completeness to theta = 67.679°   | 99.6 %                                         |                   |
| Absorption correction             | Semi-empirical from equivalents                |                   |
| Max. and min. transmission        | 0.7536 and 0.5108                              |                   |
| Refinement method                 | Full-matrix least-squares on F <sup>2</sup>    |                   |
| Data / restraints / parameters    | 3920 / 1 / 240                                 |                   |
| Goodness-of-fit on F <sup>2</sup> | 1.041                                          |                   |
| Final R indices [I>2sigma(I)]     | R1 = 0.0291, wR2 = 0.0747                      |                   |
| R indices (all data)              | R1 = 0.0304, wR2 = 0.0750                      |                   |
| Absolute structure parameter      | 0.09(6)                                        |                   |
| Extinction coefficient            | n/a                                            |                   |
| Largest diff. peak and hole       | 0.162 and -0.143 e.Å <sup>-3</sup>             |                   |



## 7.13. X-ray Crystallographic Data of Ketone 20

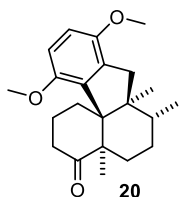

≡

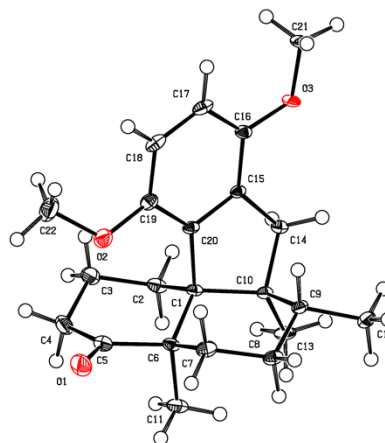

CCDC 2077908

|                                   |                                                |                 |
|-----------------------------------|------------------------------------------------|-----------------|
| Empirical formula                 | C <sub>22</sub> H <sub>30</sub> O <sub>3</sub> |                 |
| Formula weight                    | 342.46                                         |                 |
| Temperature                       | 100(2) K                                       |                 |
| Wavelength                        | 1.54178 Å                                      |                 |
| Crystal system                    | Monoclinic                                     |                 |
| Space group                       | P2 <sub>1</sub>                                |                 |
| Unit cell dimensions              | a = 9.3013(4) Å                                | a = 90°.        |
|                                   | b = 12.7878(5) Å                               | b = 97.956(2)°. |
|                                   | c = 15.5285(7) Å                               | g = 90°.        |
| Volume                            | 1829.23(13) Å <sup>3</sup>                     |                 |
| Z                                 | 4                                              |                 |
| Density (calculated)              | 1.244 Mg/m <sup>3</sup>                        |                 |
| Absorption coefficient            | 0.636 mm <sup>-1</sup>                         |                 |
| F(000)                            | 744                                            |                 |
| Crystal size                      | 0.200 x 0.150 x 0.100 mm <sup>3</sup>          |                 |
| Theta range for data collection   | 2.873 to 72.359°.                              |                 |
| Index ranges                      | -10 ≤ h ≤ 11, -15 ≤ k ≤ 15, -18 ≤ l ≤ 19       |                 |
| Reflections collected             | 21485                                          |                 |
| Independent reflections           | 7042 [R(int) = 0.0482]                         |                 |
| Completeness to theta = 67.679°   | 99.2 %                                         |                 |
| Absorption correction             | Semi-empirical from equivalents                |                 |
| Max. and min. transmission        | 0.7536 and 0.5126                              |                 |
| Refinement method                 | Full-matrix least-squares on F <sup>2</sup>    |                 |
| Data / restraints / parameters    | 7042 / 1 / 461                                 |                 |
| Goodness-of-fit on F <sup>2</sup> | 1.054                                          |                 |
| Final R indices [I > 2σ(I)]       | R1 = 0.0363, wR2 = 0.0870                      |                 |
| R indices (all data)              | R1 = 0.0383, wR2 = 0.0889                      |                 |
| Absolute structure parameter      | 0.05(7)                                        |                 |
| Extinction coefficient            | n/a                                            |                 |
| Largest diff. peak and hole       | 0.180 and -0.257 e.Å <sup>-3</sup>             |                 |

8. Chiral HPLC Analysis of (2*S*,3*R*)-2-(2,5-Dimethoxybenzyl)-2,3-dimethylcyclohexanone (**11**)

SAZ-1 - Vial 1 Inj 1 ADH,99/1,1ml - Fixed 250 nm

Current Data Path: C:\WIN32APP\CHROMASTER\SAZ\DATA\0056

Data Desc.: DAD 3-D Data

Vial Number: 1 Inj Number: 1 Sample Name: ADH,99/1,1ml/min-JLE-037-fl-fl

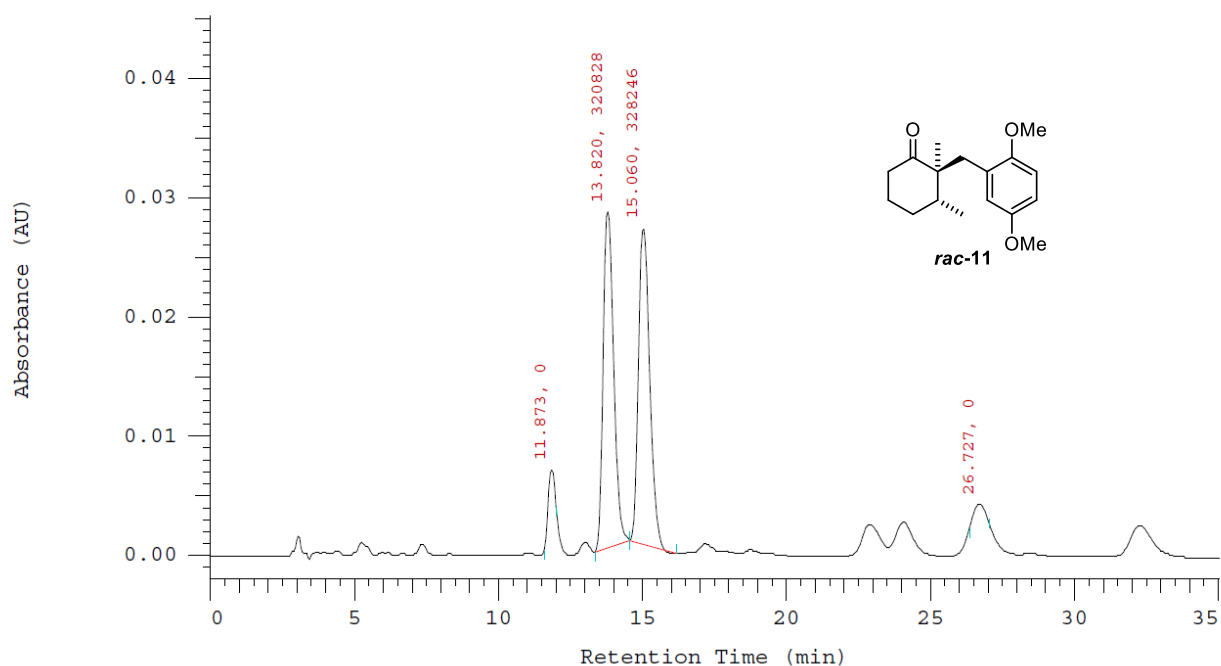HPLC chromatogram of a racemic sample of ketone **11** on chiral stationary phase.

Column: CHIRALPAK AD-H

Column temperature: 18°C

Solvent: *n*-hexane/2-propanol 99:1

Flow: 1 mL/min

Detection: 250 nm

## SAZ-1 - Vial 1 Inj 1 ADH,99/1,1ml - Fixed 250 nm

Current Data Path: C:\WIN32APP\CHROMASTER\SAZ\DATA\0057\_003

Data Desc.: DAD 3-D Data

Vial Number: 1 Inj Number: 1 Sample Name: ADH,99/1,1ml/min-JLE-060-f2

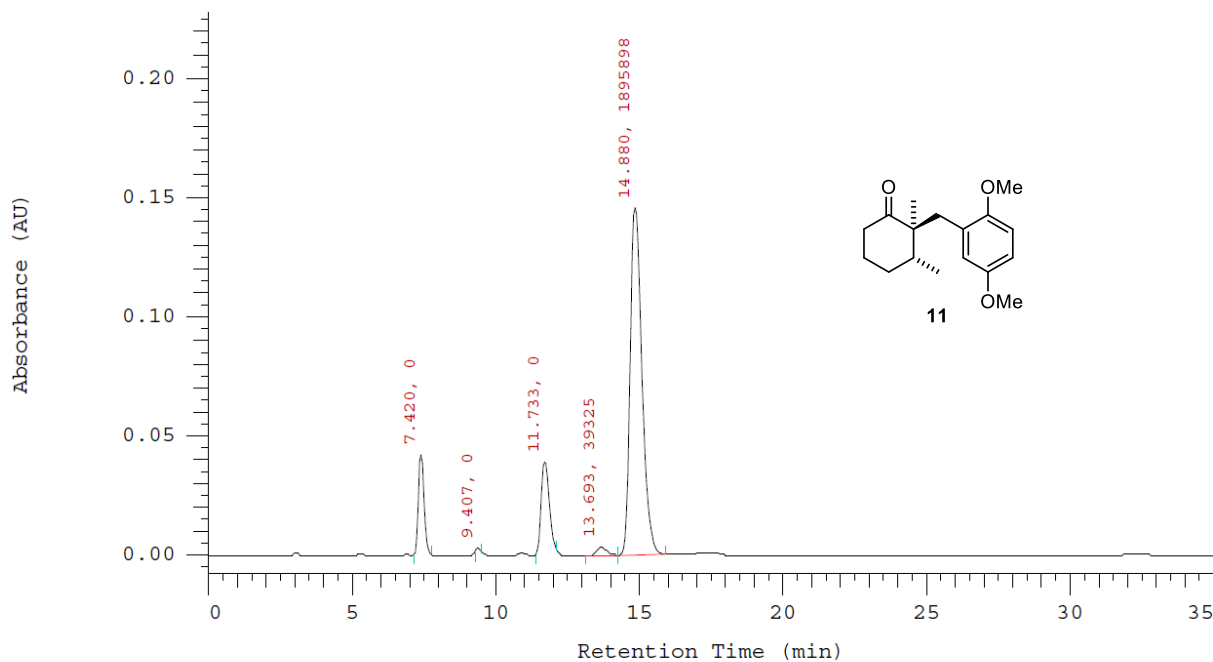HPLC chromatogram of an enantioenriched sample of ketone **11** on chiral stationary phase.

Column: CHIRALPAK AD-H

Column temperature: 18°C

Solvent: *n*-hexane/2-propanol 99:1

Flow: 1 mL/min

Detection: 250 nm

Enantiomeric excess: 96%

## 9. References

- [1] D. H. Hua, Y. Chen, H.-S. Sin, M. J. Maroto, P. D. Robinson, S. W. Newell, E. M. Perchellet, J. B. Ladesich, J. A. Freeman, J.-P. Perchellet, P. K. Chiang, *J. Org. Chem.* **1997**, *62*, 6888–6896.
- [2] U. Sudhir, B. James, S. Joly, M. S. Nair, *Res. Chem. Intermed.* **2003**, *29*, 523–532.
- [3] M. Vuagnoux-d'Augustin, A. Alexakis, *Chem. Eur. J.* **2007**, *13*, 9647–9662.
- [4] a) G. M. Sheldrick, *Acta Cryst.* **2015**, *A71*, 3–8; b) G. M. Sheldrick, *Acta Cryst.* **2015**, *C71*, 3–8.
- [5] H. Z. Kaplan, V. L. Rendina, J. S. Kingsbury, *J. Org. Chem.* **2013**, *78*, 4620–4626.
- [6] S. R. Wilson, R. N. Misra, G. M. Georgiadis, *J. Org. Chem.* **1980**, *45*, 2460–2468.
- [7] D. T. Ngoc, M. Albicker, L. Schneider, N. Cramer, *Org. Biomol. Chem.* **2010**, *8*, 1781–1784.
- [8] S. L. Rössler, B. S. Schreib, M. Ginterseder, J. Y. Hamilton, E. M. Carreira, *Org. Lett.* **2017**, *19*, 5533–5536.
- [9] D. E. Kim, Y. Zhu, T. R. Newhouse, *Org. Biomol. Chem.* **2019**, *17*, 1796–1799.
- [10] T. Imamoto, Y. Sugiura, N. Takiyama, *Tetrahedron Lett.* **1984**, *25*, 4233–4236.
- [11] D. D. Dixon, J. W. Lockner, Q. Zhou, P. S. Baran, *J. Am. Chem. Soc.* **2012**, *134*, 8432–8435.
- [12] S. Roth, C. B. W. Stark, *Angew. Chem. Int. Ed.* **2006**, *45*, 6218–6221.
- [13] J. Cvengroš, S. Neufeind, A. Becker, H.-G. Schmalz, *Synlett* **2008**, *13*, 1993–1998.
- [14] W.-H. Jiao, G.-H. Shi, T.-T. Xu, G.-D. Chen, B.-B. Gu, Z. Wang, S. Peng, S.-P. Wang, J. Li, B.-N. Han, W. Zhang, H.-W. Lin, *J. Nat. Prod.* **2016**, *79*, 406–411.
